# Supplementary material for: Chest pain in the ambulance; prevalence, causes and outcome - a retrospective cohort study
Source: Springer Nature journal article supplement (doi:10.1186/s13049-019-0659-6), 2019-08-29

# Patient flowchart

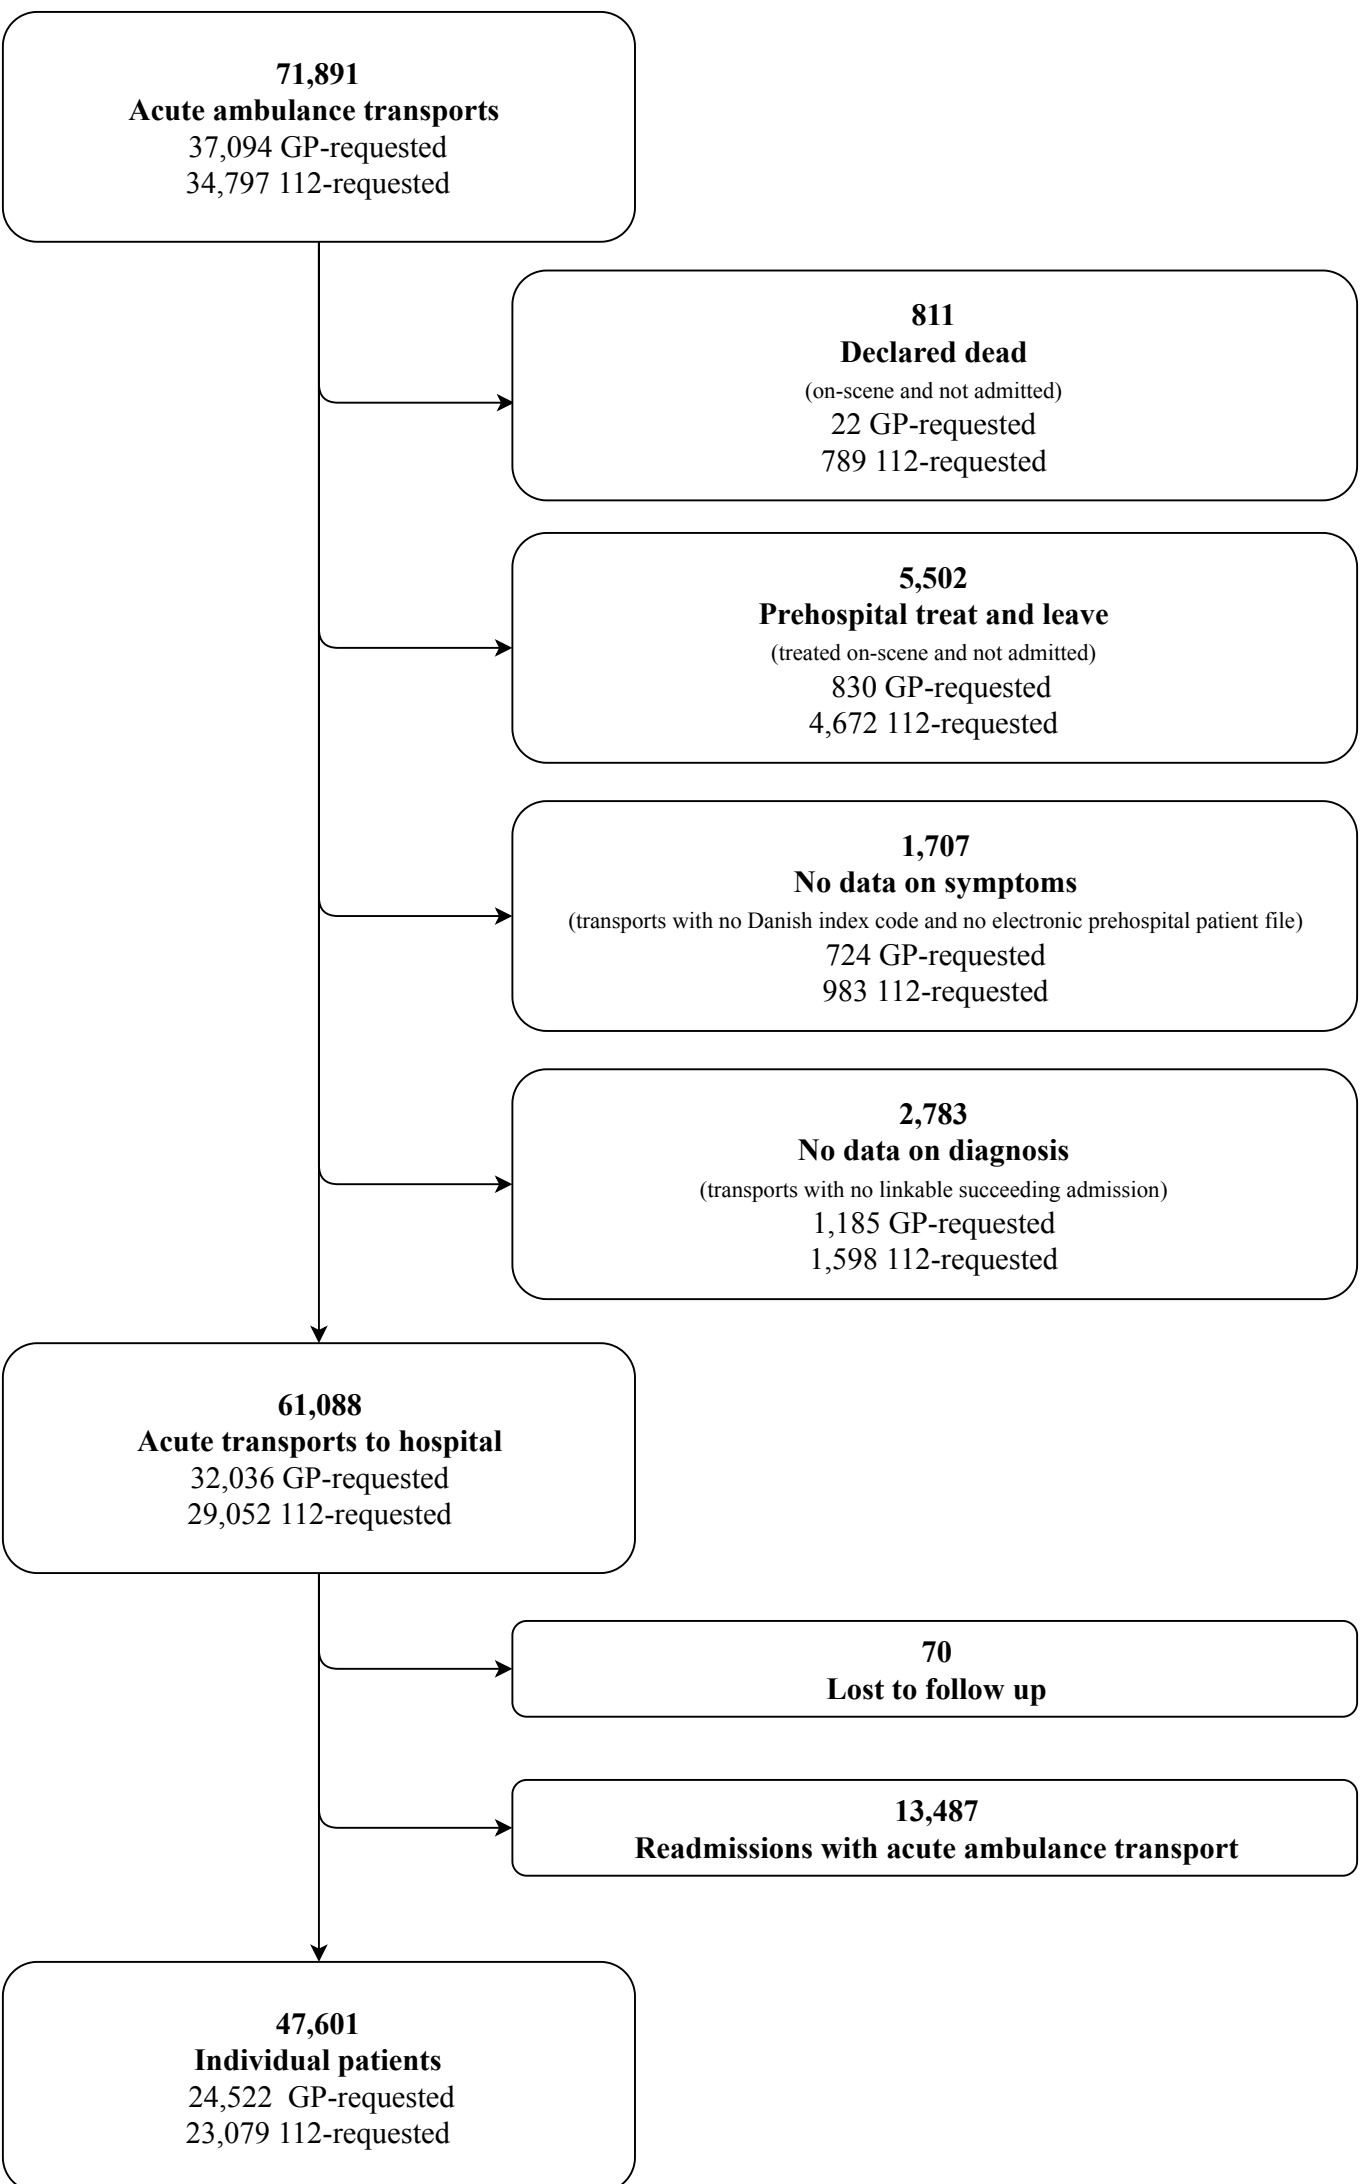

Supplement: MOESM1 [file 17117104]
