# Supplementary material for: Chest pain in the ambulance; prevalence, causes and outcome - a retrospective cohort study
Source: Springer Nature journal article supplement (doi:10.1186/s13049-019-0659-6), 2019-08-29
Supplement: MOESM2 [file 17117104]

## Additional file 2: Prehospitally terminated transports and transports missing symptoms or final diagnosis

Prehospitally terminated transports include transports of patients treated on-scene and left at home and patients declared dead and not transported to the morgue.

In the transports missing information on symptoms, we expect the information to be missing at random, as no association between chest pain and prehospital registration of symptoms are likely.

Transports with missing linkage between transport and admission (and thereby final diagnosis), includes transports of persons dying during ambulance transport and persons found dead and transported to hospital for legal or logistic reasons. Excluding these deceased patients, we expect the diagnoses to be missing at random or if non-random, to be less likely in patients receiving a diagnosis of disease, rather than in patients with “No final diagnosis” (ICD-10 diagnosis of “Rxx.x”, “Z03.x” or “Z04.x”).

| Characteristics, symptoms and diagnoses in transports terminated prehospitally, missing either symptoms or final diagnosis |     |                                   |              |                 |
|----------------------------------------------------------------------------------------------------------------------------|-----|-----------------------------------|--------------|-----------------|
|                                                                                                                            |     | Prehospital terminated transports | LPR missing  | Symptom missing |
| Acute ambulance transports, n(%)                                                                                           |     | 6,313                             | 2,783        | 1,707           |
| Way of ambulance request, n(%)                                                                                             | GP  | 852 (13.5%)                       | 1185 (42.6%) | 724 (42.4%)     |
|                                                                                                                            | 112 | 5461 (86.5%)                      | 1598 (57.4%) | 983 (57.6%)     |
| Pre-hospital triage, n(%)                                                                                                  | A   | 4205 (66.7%)                      | 1531 (55.5%) | 877 (54.5%)     |
|                                                                                                                            | B   | 2047 (32.5%)                      | 971 (35.2%)  | 337 (20.9%)     |
|                                                                                                                            | C   | 50 (0.8%)                         | 259 (9.4%)   | 396 (24.6%)     |
| Male gender, n(%)                                                                                                          |     | 3534 (56.0%)                      | 1449 (52.1%) | 859 (50.3%)     |
| Age, median (IQR)                                                                                                          |     | 55 (34, 72)                       | 56 (35, 74)  | 62 (38, 76)     |
| Diabetes, n(%)                                                                                                             |     | 1025 (19.2%)                      | 270 (10.3%)  | 184 (10.8%)     |
| Prior AMI, n(%)                                                                                                            |     | 277 (5.2%)                        | 122 (4.7%)   | 92 (5.4%)       |
| Charlson comorbidity index, n(%)                                                                                           | 0   | 1414 (26.5%)                      | 804 (30.7%)  | 513 (30.1%)     |
|                                                                                                                            | 1-2 | 1267 (23.7%)                      | 632 (24.1%)  | 334 (19.6%)     |
|                                                                                                                            | 3-4 | 1152 (21.6%)                      | 565 (21.5%)  | 344 (20.2%)     |
|                                                                                                                            | >=5 | 1507 (28.2%)                      | 621 (23.7%)  | 516 (30.2%)     |
| 30-day mortality                                                                                                           |     | 988 (15.7%)                       | 188 (6.8%)   | 106 (6.2%)      |
| 1-day mortality                                                                                                            |     | 878 (13.9%)                       | 111 (4.0%)   | 19 (1.1%)       |
| Chest pain                                                                                                                 |     | 620 (%)                           | 232 (8.7%)   |                 |
| Serious cardiac conditions                                                                                                 |     |                                   |              | 33 (1.9%)       |
| AMI                                                                                                                        |     |                                   |              | 13 (0.8%)       |
| STEMI                                                                                                                      |     |                                   |              | 8 (0.5%)        |
| NSTEMI                                                                                                                     |     |                                   |              | 5 (0.3%)        |
| Other serious cardiovascular conditions:                                                                                   |     |                                   |              | 18 (1.1%)       |
| UAP                                                                                                                        |     |                                   |              | 2 (0.1%)        |
| Cardiac arrest                                                                                                             |     |                                   |              | 9 (0.5%)        |
| Aortic dissection                                                                                                          |     |                                   |              | 2 (0.1%)        |
| Pulmonary Embolism                                                                                                         |     |                                   |              | 7 (0.4%)        |
| Other conditions:                                                                                                          |     |                                   |              | 1,308 (76.6%)   |
| Certain infectious and parasitic diseases                                                                                  |     |                                   |              | 41 (2.4%)       |
| Neoplasms                                                                                                                  |     |                                   |              | 15 (0.9%)       |
| Endocrine, nutritional and metabolic diseases                                                                              |     |                                   |              | 39 (2.3%)       |
| Mental and behavioral disorders                                                                                            |     |                                   |              | 68 (4.0%)       |
| Diseases of the nervous system                                                                                             |     |                                   |              | 54 (3.2%)       |
| Diseases of the circulatory system                                                                                         |     |                                   |              | 124 (7.3%)      |
| Diseases of the respiratory system                                                                                         |     |                                   |              | 190 (11.1%)     |
| Diseases of the digestive system                                                                                           |     |                                   |              | 90 (5.3%)       |
| Diseases of the musculoskeletal system and connective tissue                                                               |     |                                   |              | 43 (2.5%)       |
| Diseases of the genitourinary system                                                                                       |     |                                   |              | 41 (2.4%)       |
| Injury, poisoning and certain other consequences of external causes                                                        |     |                                   |              | 487 (28.5%)     |
| Other diagnoses                                                                                                            |     |                                   |              | 116 (6.8%)      |
| No final diagnosis:                                                                                                        |     |                                   |              | 366 (21.4%)     |
| Symptoms, signs and abnormal clinical and laboratory findings                                                              |     |                                   |              | 193 (11.3%)     |
| Medical observation and evaluation for suspected diseases and conditions or other reasons                                  |     |                                   |              | 173 (10.1%)     |
