# Supplementary material for: Chest pain in the ambulance; prevalence, causes and outcome - a retrospective cohort study
Source: Springer Nature journal article supplement (doi:10.1186/s13049-019-0659-6), 2019-08-29
Supplement: MOESM3 [file 17117104]

# Additional file 3: Identification of chest pain

## **Chest pain/ Chest discomfort were identified from prehospital patient records and from “Danish Index for Emergency Care” codes:**

From full-text searches the prehospital patient record notes written by the paramedics:

if the notes included any variety of the terms: “chest pain” or “chest discomfort” and without any terms rejecting chest pain or chest discomfort.

### Danish terms searched:

“ knugen (midt/centralt) (hen)over/(for/i) (venstre/højre side af) bryst(et)/thorax/brystkasse(n)”,  
“ smerte(r) (midt/centralt) (hen)over/for/i) (venstre/højre side af) bryst(et)/thorax/brystkasse(n)”,  
“ ubehag (midt/centralt) (hen)over/for/i) (venstre/højre side af) bryst(et)/thorax/brystkasse(n)”,  
“ ondt (midt/centralt) (hen)over/for/i) (venstre/højre side af) bryst(et)/thorax/brystkasse(n)”,  
“ tryk(ken) (midt/centralt) (hen)over/for/i) (venstre/højre side af) bryst(et)/thorax/brystkasse(n)”,  
“retrosternal(e) smerte(r)”,  
“bryst( )smerte(r)”,  
“angina”,

The text search included several spellings and abbreviations of each word.

We excluded any terms describing rejection of chest pain/chest discomfort symptoms.

### Validation:

To refine and validate the text search algorithm, we performed manual validation in > 5% of the cohort:

- 1) manual validation of 500 prehospital patient records by 1 author to develop the text search algorithm
- 2) manual validation of 2000 prehospital patient records by 6 doctors experienced in evaluating chest pain patients, to refine the text search algorithm
- 3) manual validation of 1000 prehospital patient records by 3 doctors experienced in evaluating chest pain patients, for final validation.

### Result of validation:

|       | A   | B   | Total |
|-------|-----|-----|-------|
| A     | 490 | 10  | 500   |
| B     | 15  | 485 | 500   |
| Total | 505 | 495 | 1000  |

Number of observed agreements: 975 ( 97.5%)

Number of agreements expected by chance: 500 ( 50.5%)

Kappa= 0.95 (=Very good agreement)

Most common reason for misclassification was mis-spellings or abnormal descriptions of chest pain/discomfort.

2) Danish Index for Emergency Care (DIEC) codes, reflecting chest pain and accompanying symptoms:

- assigned by the emergency medical dispatcher at the time of call

| DIEC-code | English term                                                                                                                                | Danish term                                                                                                      | Accompanying symptom                  |
|-----------|---------------------------------------------------------------------------------------------------------------------------------------------|------------------------------------------------------------------------------------------------------------------|---------------------------------------|
| A.10.01   | Non-responsive to speech or pain stimuli.                                                                                                   | Reagerer ikke på tilråb eller smertestimuli.                                                                     | 1- Non-responsive                     |
| A.10.02   | Chest pain and fainting.                                                                                                                    | Ondt i brystet og er ved at besvime.                                                                             | 5- Other                              |
| A.10.03   | Severe pain in center of the chest for more than 5 min.                                                                                     | Stærke smerter midt i brystet i mere end 5 min.                                                                  | 3-Radiation/severe pain>5min          |
| A.10.04   | - difficulty breathing                                                                                                                      | - vejrtrækningsbesvær                                                                                            | 2- Dyspnea                            |
| A.10.05   | - Uncomfortable, nausea                                                                                                                     | - utilpas, kvalme                                                                                                | 4 - clammy skin /Uncomfortable/nausea |
| A.10.06   | - pale, clammy skin                                                                                                                         | - bleg, klam hud                                                                                                 | 4 - clammy skin /Uncomfortable/nausea |
| A.10.07   | - radiation of pain to the jaw / shoulder / arm / back                                                                                      | - udstråling af smerterne til kæbe/skulder/arm/ryg                                                               | 3-Radiation/severe pain>5min          |
| A.10.08   | - suddenly feeble in arms                                                                                                                   | - pludselig kraftsløs i armene                                                                                   | 5- Other                              |
| A.10.09   | - ECG showing myocardial infarction (STEMI)                                                                                                 | - EKG som viser hjerteinfarkt (STEMI)                                                                            | 5- Other                              |
| A.10.10   | - transient effect of nitroglycerin.                                                                                                        | - kun forbigående virkning af nitroglycerin.                                                                     | 5- Other                              |
| A.10.11   | Possible serious heart condition, presenting with atypical symptoms, including palpitations, accompanied by severe constitutional symptoms. | Mulig alvorlig hjerteproblem med atypiske symptomer, herunder hjertebanken ledsaget af alvorlige almensymptomer. | 5- Other                              |
| A.10.14   | Chest pain - otherwise unaffected.                                                                                                          | Smerter i brystet - ellers upåvirket.                                                                            | 5- Other                              |
| C.10.01   | The pain is not particularly severe, patient is feeling OK.                                                                                 | Smerterne er ikke specielt stærke og pt. føler sig OK.                                                           | 5- Other                              |
| C.10.02   | Persistent effect of 1-4 nitroglycerin tablets / sprays.                                                                                    | Vedvarende god virkning af 1-4 nitroglycerintabletter/spraydoser.                                                | 5- Other                              |
| C.10.03   | The pain/discomfort is located superficially, in the lateral part of the chest.                                                             | Smerterne/ubehaget sidder overfladisk i siden af brystkassen.                                                    | 5- Other                              |
| E.10.01   | Pain only in association with deep inhalation or movement                                                                                   | Smerter kun ved dyb indånding eller ved bevægelse                                                                | 5- Other                              |
| A.28.03   | Chest pain and breathing difficulties.                                                                                                      | Brystsmerter og vejrtrækningsproblemer.                                                                          | 2- Dyspnea                            |
