# Supplementary material for: Chest pain in the ambulance; prevalence, causes and outcome - a retrospective cohort study
Source: Springer Nature journal article supplement (doi:10.1186/s13049-019-0659-6), 2019-08-29
Supplement: MOESM4 [file 17117104]

# Additional file 4: ICD-10 codes

---

## **Categorization of final diagnosis (ICD-10,version 2016):**

### **Serious cardiac conditions**

AMI: I21.x  
STEMI: I21.0, I21.1, I21.3  
NSTEMI: AMI, but not STEMI  
UAP: I20.0  
Cardiac arrest: I46.x  
Atrioventricular block: I44.1, I44.2  
Ventricular Tachycardia: I47.0, I47.2, I47.2, I47.2  
Aortic dissection: I71.0, I71.1, I71.3, I71.5, I71.8  
Pulmonary Embolism: I26.x  
Pneumothorax: J93.x

### **Other diagnoses according to ICD-10 chapters (expected to above mentioned)**

I Certain infectious and parasitic diseases  
A00-A09, A15-A28, A30-A89, A92-A99, B00-B09, B15-B83, B85-B99

II Neoplasms  
C00-C97, D00-D48

III Diseases of the blood and blood-forming organs and certain disorders involving the immune mechanism  
D50-D53, D55-D77, D80-D89

IV Endocrine, nutritional and metabolic diseases  
E00-E07, E10-E16, E20-E35, E40-E46, E50-E68, E70-E90

V Mental and behavioral disorders  
F00-F48, F50-F99

VI Diseases of the nervous system  
G00-G14, G20-G26, G30-G32, G35-G37, G40-G47, G50-G64, G70-G73, G80-G83, G90-G99

VII Diseases of the eye and adnexa  
H00-H06, H10-H13, H15-H22, H25-H28, H30-H36, H40-H59

VIII Diseases of the ear and mastoid process  
H60-, H65-H75, H80-H83, H90-H95

IX Diseases of the circulatory system  
I00-I02, I05-I15, I20-I25, I26-I28, I30-I52, I60-I89, I95-I99

X Diseases of the respiratory system  
J00-J06, J09-J18, J20-J22, J30-J47, J60-J70, J80-J86, J90-J99

XI Diseases of the digestive system  
K00-K14, K20-K31, K35-K38, K40-K46, K50-K52, K55-K67, K70-K77, K80-K87, K90-K93

XII Diseases of the skin and subcutaneous tissue  
L00-L08, L10-L14, L20-L30, L40-L45, L50-L75, L80-L99

XIII Diseases of the musculoskeletal system and connective tissue  
M00-M25, M30-M36, M40-M54, M60-M99

XIV Diseases of the genitourinary system  
N00-N08, N10-N23, N25-N51, N60-N64, N70-N77, N80-N99

XV Pregnancy, childbirth and the puerperium  
O00-O08, O10-O16, O20-O48, O60-O75, O80-O92, O94-O99

XVI Certain conditions originating in the perinatal period  
P00-P08, P10-P15, P20-P29, P35-P39, P50-P61, P70-P78, P80-P83, P90-P96

XVII Congenital malformations, deformations and chromosomal abnormalities  
Q00-Q07, Q10-Q18, Q20-Q28, Q30-Q45, Q50-Q56, Q60-Q99

XIX Injury, poisoning and certain other consequences of external causes  
S00-S99, T0-T88, T90-T98

XX External causes of morbidity and mortality  
V01-X59, X60-X84, X85-Y36, Y40-Y98

XVIII Symptoms, signs and abnormal clinical and laboratory findings, not elsewhere classified  
DR252A, DR258A, DR252B, DR40, DR47, DR55, DR57, DR99, DR100A

XXI Factors influencing health status and contact with health services  
Z00-Z13, Z20-Z65, Z70-Z76, Z80-Z99 (other than Z03 & Z04)

### **No final diagnosis**

XVIII Symptoms, signs and abnormal clinical and laboratory findings, not elsewhere classified  
R00-R23, R25-R29-R99 (other than DR252A, DR258A, DR252B, DR40, DR47, DR55, DR57, DR99, DR100AXXI)

XXI Factors influencing health status and contact with health services  
Z03 -Z04

## **ICD-10 diagnoses used for calculation of Charlson comorbidity index:**

Acute Myocardial Infarction  
I21, I22, I23

Congestive Heart Failure  
I50, I11.0, I13.0, I13.2

Peripheral Vascular Disease  
I70, I71, I72, I73, I74, I77

Cerebrovascular Disease  
G45, G46, I60, I61, I62, I63, I64, I65, I66, I67, I68, I69

Dementia  
F00, F01, F02, F03, G30, F051

Chronic Pulmonary Disease  
J40, J41, J42, J43, J44, J45, J46, J47, J60, J61, J62, J63, J64, J65, J66, J67, J68.4, J70.1, J70.3, J84.1, J92.0, J96.1, J98.2, J98.3

Rheumatologic Disease (Connective Tissue Disease)  
M05, M06, M08, M09, M30, M31, M32, M33, M34, M35, M36, 86

Peptic Ulcer Disease (Ulcer disease)  
K25, K26, K27, K28, K22.1

Mild Liver Disease  
B18, K71, K73, K74, K70.0, K70.1, K70.2, K70.3, K70.9, K76.0

Diabetes I and II  
E10.0, E10.1, E10.9, E11.0, E11.1, E11.9

Hemiplegia  
G81, G82

Moderate to severe renal disease  
I12, I13, N00, N01, N02, N03, N04, N05, N07, N11, N14, N17, N18, N19, Q61

Diabetes with end organ  
E10.2, E10.3, E10.4, E10.5, E10.7, E10.8, E11.2, E11.3, E11.4, E11.5, E11.6, E11.7, E11.8

Any tumor  
C00, C01, C02, C03, C04, C05, C06, C08, C09, C10, C11, C12, C13, C14, C15, C16, C17, C18, C19, C07, C20, C21, C22, C23, C24, C25, C26, C30, C31, C32, C33, C34, C37, C38, C39, C40, C41, C43, C44, C45, C46, C47, C48, C49, C50, C51, C52, C53, C54, C56, C57, C58, C60, C61, C62, C63, C64, C65, C66, C67, C68, C69, C55, C70, C71, C72, C73, C74, C75

Leukemia  
C91, C92, C93, C94, C95

Lymphoma  
C81, C82, C83, C84, C85, C88, C90, C96

Moderate to severe liver disease  
B15.0, B16.0, B16.2, B19.0, K70.4, K76.6, K72, I85

Metastatic solid tumor  
C76, C77, C78, C79, C80

AIDS  
B21, B22, B23, B24
