# Supplementary material for: Chest pain in the ambulance; prevalence, causes and outcome - a retrospective cohort study
Source: Scand J Trauma Resusc Emerg Med. 2019 Aug 29;27:84. doi: 10.1186/s13049-019-0659-6 (PMC6716930; doi:10.1186/s13049-019-0659-6)
Supplement: Supplementary file 5 — Data for Fig. 1. Raw values and categories (Fig. 1a) and time-to-event-or-censoring and censor status per patient (Fig. 1b) (XLS 7940 kb) [file 13049_2019_659_MOESM5_ESM.xls]

## Sheet: Mortality
Patient_number	Time_to_event_or_censoring_days	Censoring_status	Chest_pain	Diagnosis_category
1	31	End of follow-up	No chest pain	Serious cardiac diagnoses
2	33	End of follow-up	No chest pain	Serious cardiac diagnoses
3	35	End of follow-up	No chest pain	Serious cardiac diagnoses
4	35	End of follow-up	No chest pain	Serious cardiac diagnoses
5	36	End of follow-up	No chest pain	Serious cardiac diagnoses
6	41	End of follow-up	No chest pain	Serious cardiac diagnoses
7	45	End of follow-up	No chest pain	Serious cardiac diagnoses
8	46	End of follow-up	No chest pain	Serious cardiac diagnoses
9	48	End of follow-up	No chest pain	Serious cardiac diagnoses
10	56	End of follow-up	No chest pain	Serious cardiac diagnoses
11	56	End of follow-up	No chest pain	Serious cardiac diagnoses
12	57	End of follow-up	No chest pain	Serious cardiac diagnoses
13	60	End of follow-up	No chest pain	Serious cardiac diagnoses
14	65	End of follow-up	No chest pain	Serious cardiac diagnoses
15	66	End of follow-up	No chest pain	Serious cardiac diagnoses
16	66	End of follow-up	No chest pain	Serious cardiac diagnoses
17	66	End of follow-up	No chest pain	Serious cardiac diagnoses
18	72	End of follow-up	No chest pain	Serious cardiac diagnoses
19	77	End of follow-up	No chest pain	Serious cardiac diagnoses
20	78	End of follow-up	No chest pain	Serious cardiac diagnoses
21	81	End of follow-up	No chest pain	Serious cardiac diagnoses
22	82	End of follow-up	No chest pain	Serious cardiac diagnoses
23	85	End of follow-up	No chest pain	Serious cardiac diagnoses
24	86	End of follow-up	No chest pain	Serious cardiac diagnoses
25	86	End of follow-up	No chest pain	Serious cardiac diagnoses
26	95	End of follow-up	No chest pain	Serious cardiac diagnoses
27	95	End of follow-up	No chest pain	Serious cardiac diagnoses
28	96	End of follow-up	No chest pain	Serious cardiac diagnoses
29	99	End of follow-up	No chest pain	Serious cardiac diagnoses
30	103	End of follow-up	No chest pain	Serious cardiac diagnoses
31	112	End of follow-up	No chest pain	Serious cardiac diagnoses
32	117	End of follow-up	No chest pain	Serious cardiac diagnoses
33	120	End of follow-up	No chest pain	Serious cardiac diagnoses
34	125	End of follow-up	No chest pain	Serious cardiac diagnoses
35	132	End of follow-up	No chest pain	Serious cardiac diagnoses
36	133	End of follow-up	No chest pain	Serious cardiac diagnoses
37	136	End of follow-up	No chest pain	Serious cardiac diagnoses
38	139	End of follow-up	No chest pain	Serious cardiac diagnoses
39	140	End of follow-up	No chest pain	Serious cardiac diagnoses
40	140	End of follow-up	No chest pain	Serious cardiac diagnoses
41	150	End of follow-up	No chest pain	Serious cardiac diagnoses
42	151	End of follow-up	No chest pain	Serious cardiac diagnoses
43	158	End of follow-up	No chest pain	Serious cardiac diagnoses
44	159	End of follow-up	No chest pain	Serious cardiac diagnoses
45	163	End of follow-up	No chest pain	Serious cardiac diagnoses
46	166	End of follow-up	No chest pain	Serious cardiac diagnoses
47	170	End of follow-up	No chest pain	Serious cardiac diagnoses
48	173	End of follow-up	No chest pain	Serious cardiac diagnoses
49	194	End of follow-up	No chest pain	Serious cardiac diagnoses
50	198	End of follow-up	No chest pain	Serious cardiac diagnoses
51	199	End of follow-up	No chest pain	Serious cardiac diagnoses
52	200	End of follow-up	No chest pain	Serious cardiac diagnoses
53	200	End of follow-up	No chest pain	Serious cardiac diagnoses
54	200	End of follow-up	No chest pain	Serious cardiac diagnoses
55	200	End of follow-up	No chest pain	Serious cardiac diagnoses
56	201	End of follow-up	No chest pain	Serious cardiac diagnoses
57	202	End of follow-up	No chest pain	Serious cardiac diagnoses
58	202	End of follow-up	No chest pain	Serious cardiac diagnoses
59	202	End of follow-up	No chest pain	Serious cardiac diagnoses
60	202	End of follow-up	No chest pain	Serious cardiac diagnoses
61	203	End of follow-up	No chest pain	Serious cardiac diagnoses
62	203	End of follow-up	No chest pain	Serious cardiac diagnoses
63	203	End of follow-up	No chest pain	Serious cardiac diagnoses
64	204	End of follow-up	No chest pain	Serious cardiac diagnoses
65	204	End of follow-up	No chest pain	Serious cardiac diagnoses
66	207	End of follow-up	No chest pain	Serious cardiac diagnoses
67	208	End of follow-up	No chest pain	Serious cardiac diagnoses
68	208	End of follow-up	No chest pain	Serious cardiac diagnoses
69	209	End of follow-up	No chest pain	Serious cardiac diagnoses
70	210	End of follow-up	No chest pain	Serious cardiac diagnoses
71	210	End of follow-up	No chest pain	Serious cardiac diagnoses
72	211	End of follow-up	No chest pain	Serious cardiac diagnoses
73	211	End of follow-up	No chest pain	Serious cardiac diagnoses
74	211	End of follow-up	No chest pain	Serious cardiac diagnoses
75	211	End of follow-up	No chest pain	Serious cardiac diagnoses
76	211	End of follow-up	No chest pain	Serious cardiac diagnoses
77	212	End of follow-up	No chest pain	Serious cardiac diagnoses
78	213	End of follow-up	No chest pain	Serious cardiac diagnoses
79	214	End of follow-up	No chest pain	Serious cardiac diagnoses
80	215	End of follow-up	No chest pain	Serious cardiac diagnoses
81	215	End of follow-up	No chest pain	Serious cardiac diagnoses
82	216	End of follow-up	No chest pain	Serious cardiac diagnoses
83	217	End of follow-up	No chest pain	Serious cardiac diagnoses
84	217	End of follow-up	No chest pain	Serious cardiac diagnoses
85	217	End of follow-up	No chest pain	Serious cardiac diagnoses
86	218	End of follow-up	No chest pain	Serious cardiac diagnoses
87	219	End of follow-up	No chest pain	Serious cardiac diagnoses
88	220	End of follow-up	No chest pain	Serious cardiac diagnoses
89	220	End of follow-up	No chest pain	Serious cardiac diagnoses
90	221	End of follow-up	No chest pain	Serious cardiac diagnoses
91	222	End of follow-up	No chest pain	Serious cardiac diagnoses
92	223	End of follow-up	No chest pain	Serious cardiac diagnoses
93	223	End of follow-up	No chest pain	Serious cardiac diagnoses
94	223	End of follow-up	No chest pain	Serious cardiac diagnoses
95	224	End of follow-up	No chest pain	Serious cardiac diagnoses
96	224	End of follow-up	No chest pain	Serious cardiac diagnoses
97	225	End of follow-up	No chest pain	Serious cardiac diagnoses
98	225	End of follow-up	No chest pain	Serious cardiac diagnoses
99	227	End of follow-up	No chest pain	Serious cardiac diagnoses
100	227	End of follow-up	No chest pain	Serious cardiac diagnoses
101	227	End of follow-up	No chest pain	Serious cardiac diagnoses
102	227	End of follow-up	No chest pain	Serious cardiac diagnoses
103	228	End of follow-up	No chest pain	Serious cardiac diagnoses
104	228	End of follow-up	No chest pain	Serious cardiac diagnoses
105	228	End of follow-up	No chest pain	Serious cardiac diagnoses
106	229	End of follow-up	No chest pain	Serious cardiac diagnoses
107	229	End of follow-up	No chest pain	Serious cardiac diagnoses
108	230	End of follow-up	No chest pain	Serious cardiac diagnoses
109	230	End of follow-up	No chest pain	Serious cardiac diagnoses
110	231	End of follow-up	No chest pain	Serious cardiac diagnoses
111	232	End of follow-up	No chest pain	Serious cardiac diagnoses
112	232	End of follow-up	No chest pain	Serious cardiac diagnoses
113	233	End of follow-up	No chest pain	Serious cardiac diagnoses
114	233	End of follow-up	No chest pain	Serious cardiac diagnoses
115	234	End of follow-up	No chest pain	Serious cardiac diagnoses
116	235	End of follow-up	No chest pain	Serious cardiac diagnoses
117	235	End of follow-up	No chest pain	Serious cardiac diagnoses
118	235	End of follow-up	No chest pain	Serious cardiac diagnoses
119	236	End of follow-up	No chest pain	Serious cardiac diagnoses
120	236	End of follow-up	No chest pain	Serious cardiac diagnoses
121	237	End of follow-up	No chest pain	Serious cardiac diagnoses
122	238	End of follow-up	No chest pain	Serious cardiac diagnoses
123	238	End of follow-up	No chest pain	Serious cardiac diagnoses
124	238	End of follow-up	No chest pain	Serious cardiac diagnoses
125	241	End of follow-up	No chest pain	Serious cardiac diagnoses
126	241	End of follow-up	No chest pain	Serious cardiac diagnoses
127	241	End of follow-up	No chest pain	Serious cardiac diagnoses
128	241	End of follow-up	No chest pain	Serious cardiac diagnoses
129	242	End of follow-up	No chest pain	Serious cardiac diagnoses
130	243	End of follow-up	No chest pain	Serious cardiac diagnoses
131	243	End of follow-up	No chest pain	Serious cardiac diagnoses
132	245	End of follow-up	No chest pain	Serious cardiac diagnoses
133	245	End of follow-up	No chest pain	Serious cardiac diagnoses
134	245	End of follow-up	No chest pain	Serious cardiac diagnoses
135	245	End of follow-up	No chest pain	Serious cardiac diagnoses
136	246	End of follow-up	No chest pain	Serious cardiac diagnoses
137	247	End of follow-up	No chest pain	Serious cardiac diagnoses
138	248	End of follow-up	No chest pain	Serious cardiac diagnoses
139	249	End of follow-up	No chest pain	Serious cardiac diagnoses
140	249	End of follow-up	No chest pain	Serious cardiac diagnoses
141	250	End of follow-up	No chest pain	Serious cardiac diagnoses
142	250	End of follow-up	No chest pain	Serious cardiac diagnoses
143	251	End of follow-up	No chest pain	Serious cardiac diagnoses
144	252	End of follow-up	No chest pain	Serious cardiac diagnoses
145	253	End of follow-up	No chest pain	Serious cardiac diagnoses
146	254	End of follow-up	No chest pain	Serious cardiac diagnoses
147	255	End of follow-up	No chest pain	Serious cardiac diagnoses
148	255	End of follow-up	No chest pain	Serious cardiac diagnoses
149	255	End of follow-up	No chest pain	Serious cardiac diagnoses
150	255	End of follow-up	No chest pain	Serious cardiac diagnoses
151	256	End of follow-up	No chest pain	Serious cardiac diagnoses
152	257	End of follow-up	No chest pain	Serious cardiac diagnoses
153	257	End of follow-up	No chest pain	Serious cardiac diagnoses
154	257	End of follow-up	No chest pain	Serious cardiac diagnoses
155	258	End of follow-up	No chest pain	Serious cardiac diagnoses
156	259	End of follow-up	No chest pain	Serious cardiac diagnoses
157	259	End of follow-up	No chest pain	Serious cardiac diagnoses
158	260	End of follow-up	No chest pain	Serious cardiac diagnoses
159	261	End of follow-up	No chest pain	Serious cardiac diagnoses
160	261	End of follow-up	No chest pain	Serious cardiac diagnoses
161	262	End of follow-up	No chest pain	Serious cardiac diagnoses
162	262	End of follow-up	No chest pain	Serious cardiac diagnoses
163	262	End of follow-up	No chest pain	Serious cardiac diagnoses
164	262	End of follow-up	No chest pain	Serious cardiac diagnoses
165	262	End of follow-up	No chest pain	Serious cardiac diagnoses
166	264	End of follow-up	No chest pain	Serious cardiac diagnoses
167	266	End of follow-up	No chest pain	Serious cardiac diagnoses
168	266	End of follow-up	No chest pain	Serious cardiac diagnoses
169	266	End of follow-up	No chest pain	Serious cardiac diagnoses
170	266	End of follow-up	No chest pain	Serious cardiac diagnoses
171	268	End of follow-up	No chest pain	Serious cardiac diagnoses
172	269	End of follow-up	No chest pain	Serious cardiac diagnoses
173	270	End of follow-up	No chest pain	Serious cardiac diagnoses
174	271	End of follow-up	No chest pain	Serious cardiac diagnoses
175	271	End of follow-up	No chest pain	Serious cardiac diagnoses
176	271	End of follow-up	No chest pain	Serious cardiac diagnoses
177	272	End of follow-up	No chest pain	Serious cardiac diagnoses
178	272	End of follow-up	No chest pain	Serious cardiac diagnoses
179	272	End of follow-up	No chest pain	Serious cardiac diagnoses
180	273	End of follow-up	No chest pain	Serious cardiac diagnoses
181	273	End of follow-up	No chest pain	Serious cardiac diagnoses
182	274	End of follow-up	No chest pain	Serious cardiac diagnoses
183	276	End of follow-up	No chest pain	Serious cardiac diagnoses
184	276	End of follow-up	No chest pain	Serious cardiac diagnoses
185	276	End of follow-up	No chest pain	Serious cardiac diagnoses
186	277	End of follow-up	No chest pain	Serious cardiac diagnoses
187	277	End of follow-up	No chest pain	Serious cardiac diagnoses
188	277	End of follow-up	No chest pain	Serious cardiac diagnoses
189	278	End of follow-up	No chest pain	Serious cardiac diagnoses
190	279	End of follow-up	No chest pain	Serious cardiac diagnoses
191	279	End of follow-up	No chest pain	Serious cardiac diagnoses
192	281	End of follow-up	No chest pain	Serious cardiac diagnoses
193	281	End of follow-up	No chest pain	Serious cardiac diagnoses
194	282	End of follow-up	No chest pain	Serious cardiac diagnoses
195	282	End of follow-up	No chest pain	Serious cardiac diagnoses
196	282	End of follow-up	No chest pain	Serious cardiac diagnoses
197	282	End of follow-up	No chest pain	Serious cardiac diagnoses
198	283	End of follow-up	No chest pain	Serious cardiac diagnoses
199	284	End of follow-up	No chest pain	Serious cardiac diagnoses
200	284	End of follow-up	No chest pain	Serious cardiac diagnoses
201	285	End of follow-up	No chest pain	Serious cardiac diagnoses
202	285	End of follow-up	No chest pain	Serious cardiac diagnoses
203	285	End of follow-up	No chest pain	Serious cardiac diagnoses
204	286	End of follow-up	No chest pain	Serious cardiac diagnoses
205	286	End of follow-up	No chest pain	Serious cardiac diagnoses
206	286	End of follow-up	No chest pain	Serious cardiac diagnoses
207	287	End of follow-up	No chest pain	Serious cardiac diagnoses
208	287	End of follow-up	No chest pain	Serious cardiac diagnoses
209	287	End of follow-up	No chest pain	Serious cardiac diagnoses
210	287	End of follow-up	No chest pain	Serious cardiac diagnoses
211	287	End of follow-up	No chest pain	Serious cardiac diagnoses
212	288	End of follow-up	No chest pain	Serious cardiac diagnoses
213	288	End of follow-up	No chest pain	Serious cardiac diagnoses
214	288	End of follow-up	No chest pain	Serious cardiac diagnoses
215	290	End of follow-up	No chest pain	Serious cardiac diagnoses
216	290	End of follow-up	No chest pain	Serious cardiac diagnoses
217	291	End of follow-up	No chest pain	Serious cardiac diagnoses
218	292	End of follow-up	No chest pain	Serious cardiac diagnoses
219	292	End of follow-up	No chest pain	Serious cardiac diagnoses
220	292	End of follow-up	No chest pain	Serious cardiac diagnoses
221	293	End of follow-up	No chest pain	Serious cardiac diagnoses
222	294	End of follow-up	No chest pain	Serious cardiac diagnoses
223	294	End of follow-up	No chest pain	Serious cardiac diagnoses
224	294	End of follow-up	No chest pain	Serious cardiac diagnoses
225	295	End of follow-up	No chest pain	Serious cardiac diagnoses
226	297	End of follow-up	No chest pain	Serious cardiac diagnoses
227	297	End of follow-up	No chest pain	Serious cardiac diagnoses
228	297	End of follow-up	No chest pain	Serious cardiac diagnoses
229	298	End of follow-up	No chest pain	Serious cardiac diagnoses
230	298	End of follow-up	No chest pain	Serious cardiac diagnoses
231	299	End of follow-up	No chest pain	Serious cardiac diagnoses
232	299	End of follow-up	No chest pain	Serious cardiac diagnoses
233	300	End of follow-up	No chest pain	Serious cardiac diagnoses
234	300	End of follow-up	No chest pain	Serious cardiac diagnoses
235	300	End of follow-up	No chest pain	Serious cardiac diagnoses
236	301	End of follow-up	No chest pain	Serious cardiac diagnoses
237	301	End of follow-up	No chest pain	Serious cardiac diagnoses
238	303	End of follow-up	No chest pain	Serious cardiac diagnoses
239	303	End of follow-up	No chest pain	Serious cardiac diagnoses
240	304	End of follow-up	No chest pain	Serious cardiac diagnoses
241	305	End of follow-up	No chest pain	Serious cardiac diagnoses
242	305	End of follow-up	No chest pain	Serious cardiac diagnoses
243	305	End of follow-up	No chest pain	Serious cardiac diagnoses
244	305	End of follow-up	No chest pain	Serious cardiac diagnoses
245	305	End of follow-up	No chest pain	Serious cardiac diagnoses
246	306	End of follow-up	No chest pain	Serious cardiac diagnoses
247	306	End of follow-up	No chest pain	Serious cardiac diagnoses
248	306	End of follow-up	No chest pain	Serious cardiac diagnoses
249	307	End of follow-up	No chest pain	Serious cardiac diagnoses
250	307	End of follow-up	No chest pain	Serious cardiac diagnoses
251	307	End of follow-up	No chest pain	Serious cardiac diagnoses
252	307	End of follow-up	No chest pain	Serious cardiac diagnoses
253	307	End of follow-up	No chest pain	Serious cardiac diagnoses
254	307	End of follow-up	No chest pain	Serious cardiac diagnoses
255	307	End of follow-up	No chest pain	Serious cardiac diagnoses
256	308	End of follow-up	No chest pain	Serious cardiac diagnoses
257	309	End of follow-up	No chest pain	Serious cardiac diagnoses
258	310	End of follow-up	No chest pain	Serious cardiac diagnoses
259	310	End of follow-up	No chest pain	Serious cardiac diagnoses
260	311	End of follow-up	No chest pain	Serious cardiac diagnoses
261	311	End of follow-up	No chest pain	Serious cardiac diagnoses
262	311	End of follow-up	No chest pain	Serious cardiac diagnoses
263	311	End of follow-up	No chest pain	Serious cardiac diagnoses
264	311	End of follow-up	No chest pain	Serious cardiac diagnoses
265	312	End of follow-up	No chest pain	Serious cardiac diagnoses
266	312	End of follow-up	No chest pain	Serious cardiac diagnoses
267	313	End of follow-up	No chest pain	Serious cardiac diagnoses
268	313	End of follow-up	No chest pain	Serious cardiac diagnoses
269	313	End of follow-up	No chest pain	Serious cardiac diagnoses
270	314	End of follow-up	No chest pain	Serious cardiac diagnoses
271	315	End of follow-up	No chest pain	Serious cardiac diagnoses
272	315	End of follow-up	No chest pain	Serious cardiac diagnoses
273	315	End of follow-up	No chest pain	Serious cardiac diagnoses
274	316	End of follow-up	No chest pain	Serious cardiac diagnoses
275	316	End of follow-up	No chest pain	Serious cardiac diagnoses
276	317	End of follow-up	No chest pain	Serious cardiac diagnoses
277	317	End of follow-up	No chest pain	Serious cardiac diagnoses
278	318	End of follow-up	No chest pain	Serious cardiac diagnoses
279	319	End of follow-up	No chest pain	Serious cardiac diagnoses
280	321	End of follow-up	No chest pain	Serious cardiac diagnoses
281	321	End of follow-up	No chest pain	Serious cardiac diagnoses
282	321	End of follow-up	No chest pain	Serious cardiac diagnoses
283	321	End of follow-up	No chest pain	Serious cardiac diagnoses
284	323	End of follow-up	No chest pain	Serious cardiac diagnoses
285	324	End of follow-up	No chest pain	Serious cardiac diagnoses
286	325	End of follow-up	No chest pain	Serious cardiac diagnoses
287	325	End of follow-up	No chest pain	Serious cardiac diagnoses
288	326	End of follow-up	No chest pain	Serious cardiac diagnoses
289	326	End of follow-up	No chest pain	Serious cardiac diagnoses
290	326	End of follow-up	No chest pain	Serious cardiac diagnoses
291	327	End of follow-up	No chest pain	Serious cardiac diagnoses
292	328	End of follow-up	No chest pain	Serious cardiac diagnoses
293	328	End of follow-up	No chest pain	Serious cardiac diagnoses
294	328	End of follow-up	No chest pain	Serious cardiac diagnoses
295	329	End of follow-up	No chest pain	Serious cardiac diagnoses
296	331	End of follow-up	No chest pain	Serious cardiac diagnoses
297	332	End of follow-up	No chest pain	Serious cardiac diagnoses
298	332	End of follow-up	No chest pain	Serious cardiac diagnoses
299	335	End of follow-up	No chest pain	Serious cardiac diagnoses
300	335	End of follow-up	No chest pain	Serious cardiac diagnoses
301	337	End of follow-up	No chest pain	Serious cardiac diagnoses
302	338	End of follow-up	No chest pain	Serious cardiac diagnoses
303	338	End of follow-up	No chest pain	Serious cardiac diagnoses
304	338	End of follow-up	No chest pain	Serious cardiac diagnoses
305	338	End of follow-up	No chest pain	Serious cardiac diagnoses
306	340	End of follow-up	No chest pain	Serious cardiac diagnoses
307	341	End of follow-up	No chest pain	Serious cardiac diagnoses
308	342	End of follow-up	No chest pain	Serious cardiac diagnoses
309	342	End of follow-up	No chest pain	Serious cardiac diagnoses
310	343	End of follow-up	No chest pain	Serious cardiac diagnoses
311	343	End of follow-up	No chest pain	Serious cardiac diagnoses
312	343	End of follow-up	No chest pain	Serious cardiac diagnoses
313	344	End of follow-up	No chest pain	Serious cardiac diagnoses
314	345	End of follow-up	No chest pain	Serious cardiac diagnoses
315	347	End of follow-up	No chest pain	Serious cardiac diagnoses
316	347	End of follow-up	No chest pain	Serious cardiac diagnoses
317	348	End of follow-up	No chest pain	Serious cardiac diagnoses
318	349	End of follow-up	No chest pain	Serious cardiac diagnoses
319	350	End of follow-up	No chest pain	Serious cardiac diagnoses
320	350	End of follow-up	No chest pain	Serious cardiac diagnoses
321	350	End of follow-up	No chest pain	Serious cardiac diagnoses
322	350	End of follow-up	No chest pain	Serious cardiac diagnoses
323	350	End of follow-up	No chest pain	Serious cardiac diagnoses
324	350	End of follow-up	No chest pain	Serious cardiac diagnoses
325	351	End of follow-up	No chest pain	Serious cardiac diagnoses
326	351	End of follow-up	No chest pain	Serious cardiac diagnoses
327	354	End of follow-up	No chest pain	Serious cardiac diagnoses
328	356	End of follow-up	No chest pain	Serious cardiac diagnoses
329	356	End of follow-up	No chest pain	Serious cardiac diagnoses
330	358	End of follow-up	No chest pain	Serious cardiac diagnoses
331	359	End of follow-up	No chest pain	Serious cardiac diagnoses
332	359	End of follow-up	No chest pain	Serious cardiac diagnoses
333	359	End of follow-up	No chest pain	Serious cardiac diagnoses
334	360	End of follow-up	No chest pain	Serious cardiac diagnoses
335	361	End of follow-up	No chest pain	Serious cardiac diagnoses
336	361	End of follow-up	No chest pain	Serious cardiac diagnoses
337	362	End of follow-up	No chest pain	Serious cardiac diagnoses
338	362	End of follow-up	No chest pain	Serious cardiac diagnoses
339	363	End of follow-up	No chest pain	Serious cardiac diagnoses
340	363	End of follow-up	No chest pain	Serious cardiac diagnoses
341	364	End of follow-up	No chest pain	Serious cardiac diagnoses
342	364	End of follow-up	No chest pain	Serious cardiac diagnoses
343	364	End of follow-up	No chest pain	Serious cardiac diagnoses
344	366	End of follow-up	No chest pain	Serious cardiac diagnoses
345	367	End of follow-up	No chest pain	Serious cardiac diagnoses
346	369	End of follow-up	No chest pain	Serious cardiac diagnoses
347	369	End of follow-up	No chest pain	Serious cardiac diagnoses
348	369	End of follow-up	No chest pain	Serious cardiac diagnoses
349	371	End of follow-up	No chest pain	Serious cardiac diagnoses
350	371	End of follow-up	No chest pain	Serious cardiac diagnoses
351	371	End of follow-up	No chest pain	Serious cardiac diagnoses
352	372	End of follow-up	No chest pain	Serious cardiac diagnoses
353	374	End of follow-up	No chest pain	Serious cardiac diagnoses
354	376	End of follow-up	No chest pain	Serious cardiac diagnoses
355	376	End of follow-up	No chest pain	Serious cardiac diagnoses
356	377	End of follow-up	No chest pain	Serious cardiac diagnoses
357	377	End of follow-up	No chest pain	Serious cardiac diagnoses
358	377	End of follow-up	No chest pain	Serious cardiac diagnoses
359	378	End of follow-up	No chest pain	Serious cardiac diagnoses
360	378	End of follow-up	No chest pain	Serious cardiac diagnoses
361	378	End of follow-up	No chest pain	Serious cardiac diagnoses
362	378	End of follow-up	No chest pain	Serious cardiac diagnoses
363	378	End of follow-up	No chest pain	Serious cardiac diagnoses
364	378	End of follow-up	No chest pain	Serious cardiac diagnoses
365	379	End of follow-up	No chest pain	Serious cardiac diagnoses
366	379	End of follow-up	No chest pain	Serious cardiac diagnoses
367	379	End of follow-up	No chest pain	Serious cardiac diagnoses
368	380	End of follow-up	No chest pain	Serious cardiac diagnoses
369	381	End of follow-up	No chest pain	Serious cardiac diagnoses
370	382	End of follow-up	No chest pain	Serious cardiac diagnoses
371	382	End of follow-up	No chest pain	Serious cardiac diagnoses
372	382	End of follow-up	No chest pain	Serious cardiac diagnoses
373	383	End of follow-up	No chest pain	Serious cardiac diagnoses
374	383	End of follow-up	No chest pain	Serious cardiac diagnoses
375	385	End of follow-up	No chest pain	Serious cardiac diagnoses
376	386	End of follow-up	No chest pain	Serious cardiac diagnoses
377	386	End of follow-up	No chest pain	Serious cardiac diagnoses
378	386	End of follow-up	No chest pain	Serious cardiac diagnoses
379	386	End of follow-up	No chest pain	Serious cardiac diagnoses
380	387	End of follow-up	No chest pain	Serious cardiac diagnoses
381	387	End of follow-up	No chest pain	Serious cardiac diagnoses
382	388	End of follow-up	No chest pain	Serious cardiac diagnoses
383	389	End of follow-up	No chest pain	Serious cardiac diagnoses
384	390	End of follow-up	No chest pain	Serious cardiac diagnoses
385	390	End of follow-up	No chest pain	Serious cardiac diagnoses
386	391	End of follow-up	No chest pain	Serious cardiac diagnoses
387	392	End of follow-up	No chest pain	Serious cardiac diagnoses
388	393	End of follow-up	No chest pain	Serious cardiac diagnoses
389	394	End of follow-up	No chest pain	Serious cardiac diagnoses
390	395	End of follow-up	No chest pain	Serious cardiac diagnoses
391	395	End of follow-up	No chest pain	Serious cardiac diagnoses
392	396	End of follow-up	No chest pain	Serious cardiac diagnoses
393	396	End of follow-up	No chest pain	Serious cardiac diagnoses
394	396	End of follow-up	No chest pain	Serious cardiac diagnoses
395	397	End of follow-up	No chest pain	Serious cardiac diagnoses
396	397	End of follow-up	No chest pain	Serious cardiac diagnoses
397	397	End of follow-up	No chest pain	Serious cardiac diagnoses
398	398	End of follow-up	No chest pain	Serious cardiac diagnoses
399	398	End of follow-up	No chest pain	Serious cardiac diagnoses
400	400	End of follow-up	No chest pain	Serious cardiac diagnoses
401	401	End of follow-up	No chest pain	Serious cardiac diagnoses
402	401	End of follow-up	No chest pain	Serious cardiac diagnoses
403	403	End of follow-up	No chest pain	Serious cardiac diagnoses
404	404	End of follow-up	No chest pain	Serious cardiac diagnoses
405	404	End of follow-up	No chest pain	Serious cardiac diagnoses
406	404	End of follow-up	No chest pain	Serious cardiac diagnoses
407	404	End of follow-up	No chest pain	Serious cardiac diagnoses
408	404	End of follow-up	No chest pain	Serious cardiac diagnoses
409	406	End of follow-up	No chest pain	Serious cardiac diagnoses
410	406	End of follow-up	No chest pain	Serious cardiac diagnoses
411	406	End of follow-up	No chest pain	Serious cardiac diagnoses
412	407	End of follow-up	No chest pain	Serious cardiac diagnoses
413	407	End of follow-up	No chest pain	Serious cardiac diagnoses
414	409	End of follow-up	No chest pain	Serious cardiac diagnoses
415	409	End of follow-up	No chest pain	Serious cardiac diagnoses
416	409	End of follow-up	No chest pain	Serious cardiac diagnoses
417	410	End of follow-up	No chest pain	Serious cardiac diagnoses
418	411	End of follow-up	No chest pain	Serious cardiac diagnoses
419	411	End of follow-up	No chest pain	Serious cardiac diagnoses
420	411	End of follow-up	No chest pain	Serious cardiac diagnoses
421	412	End of follow-up	No chest pain	Serious cardiac diagnoses
422	412	End of follow-up	No chest pain	Serious cardiac diagnoses
423	412	End of follow-up	No chest pain	Serious cardiac diagnoses
424	414	End of follow-up	No chest pain	Serious cardiac diagnoses
425	414	End of follow-up	No chest pain	Serious cardiac diagnoses
426	415	End of follow-up	No chest pain	Serious cardiac diagnoses
427	416	End of follow-up	No chest pain	Serious cardiac diagnoses
428	416	End of follow-up	No chest pain	Serious cardiac diagnoses
429	418	End of follow-up	No chest pain	Serious cardiac diagnoses
430	418	End of follow-up	No chest pain	Serious cardiac diagnoses
431	419	End of follow-up	No chest pain	Serious cardiac diagnoses
432	419	End of follow-up	No chest pain	Serious cardiac diagnoses
433	420	End of follow-up	No chest pain	Serious cardiac diagnoses
434	421	End of follow-up	No chest pain	Serious cardiac diagnoses
435	422	End of follow-up	No chest pain	Serious cardiac diagnoses
436	423	End of follow-up	No chest pain	Serious cardiac diagnoses
437	424	End of follow-up	No chest pain	Serious cardiac diagnoses
438	427	End of follow-up	No chest pain	Serious cardiac diagnoses
439	428	End of follow-up	No chest pain	Serious cardiac diagnoses
440	431	End of follow-up	No chest pain	Serious cardiac diagnoses
441	432	End of follow-up	No chest pain	Serious cardiac diagnoses
442	432	End of follow-up	No chest pain	Serious cardiac diagnoses
443	433	End of follow-up	No chest pain	Serious cardiac diagnoses
444	434	End of follow-up	No chest pain	Serious cardiac diagnoses
445	434	End of follow-up	No chest pain	Serious cardiac diagnoses
446	434	End of follow-up	No chest pain	Serious cardiac diagnoses
447	435	End of follow-up	No chest pain	Serious cardiac diagnoses
448	436	End of follow-up	No chest pain	Serious cardiac diagnoses
449	436	End of follow-up	No chest pain	Serious cardiac diagnoses
450	437	End of follow-up	No chest pain	Serious cardiac diagnoses
451	438	End of follow-up	No chest pain	Serious cardiac diagnoses
452	438	End of follow-up	No chest pain	Serious cardiac diagnoses
453	439	End of follow-up	No chest pain	Serious cardiac diagnoses
454	439	End of follow-up	No chest pain	Serious cardiac diagnoses
455	439	End of follow-up	No chest pain	Serious cardiac diagnoses
456	440	End of follow-up	No chest pain	Serious cardiac diagnoses
457	442	End of follow-up	No chest pain	Serious cardiac diagnoses
458	442	End of follow-up	No chest pain	Serious cardiac diagnoses
459	444	End of follow-up	No chest pain	Serious cardiac diagnoses
460	445	End of follow-up	No chest pain	Serious cardiac diagnoses
461	446	End of follow-up	No chest pain	Serious cardiac diagnoses
462	446	End of follow-up	No chest pain	Serious cardiac diagnoses
463	446	End of follow-up	No chest pain	Serious cardiac diagnoses
464	448	End of follow-up	No chest pain	Serious cardiac diagnoses
465	449	End of follow-up	No chest pain	Serious cardiac diagnoses
466	450	End of follow-up	No chest pain	Serious cardiac diagnoses
467	450	End of follow-up	No chest pain	Serious cardiac diagnoses
468	450	End of follow-up	No chest pain	Serious cardiac diagnoses
469	452	End of follow-up	No chest pain	Serious cardiac diagnoses
470	452	End of follow-up	No chest pain	Serious cardiac diagnoses
471	453	End of follow-up	No chest pain	Serious cardiac diagnoses
472	454	End of follow-up	No chest pain	Serious cardiac diagnoses
473	456	End of follow-up	No chest pain	Serious cardiac diagnoses
474	457	End of follow-up	No chest pain	Serious cardiac diagnoses
475	458	End of follow-up	No chest pain	Serious cardiac diagnoses
476	458	End of follow-up	No chest pain	Serious cardiac diagnoses
477	459	End of follow-up	No chest pain	Serious cardiac diagnoses
478	461	End of follow-up	No chest pain	Serious cardiac diagnoses
479	462	End of follow-up	No chest pain	Serious cardiac diagnoses
480	462	End of follow-up	No chest pain	Serious cardiac diagnoses
481	464	End of follow-up	No chest pain	Serious cardiac diagnoses
482	464	End of follow-up	No chest pain	Serious cardiac diagnoses
483	465	End of follow-up	No chest pain	Serious cardiac diagnoses
484	465	End of follow-up	No chest pain	Serious cardiac diagnoses
485	465	End of follow-up	No chest pain	Serious cardiac diagnoses
486	467	End of follow-up	No chest pain	Serious cardiac diagnoses
487	468	End of follow-up	No chest pain	Serious cardiac diagnoses
488	469	End of follow-up	No chest pain	Serious cardiac diagnoses
489	470	End of follow-up	No chest pain	Serious cardiac diagnoses
490	470	End of follow-up	No chest pain	Serious cardiac diagnoses
491	473	End of follow-up	No chest pain	Serious cardiac diagnoses
492	475	End of follow-up	No chest pain	Serious cardiac diagnoses
493	476	End of follow-up	No chest pain	Serious cardiac diagnoses
494	476	End of follow-up	No chest pain	Serious cardiac diagnoses
495	477	End of follow-up	No chest pain	Serious cardiac diagnoses
496	477	End of follow-up	No chest pain	Serious cardiac diagnoses
497	477	End of follow-up	No chest pain	Serious cardiac diagnoses
498	478	End of follow-up	No chest pain	Serious cardiac diagnoses
499	479	End of follow-up	No chest pain	Serious cardiac diagnoses
500	480	End of follow-up	No chest pain	Serious cardiac diagnoses
501	481	End of follow-up	No chest pain	Serious cardiac diagnoses
502	481	End of follow-up	No chest pain	Serious cardiac diagnoses
503	481	End of follow-up	No chest pain	Serious cardiac diagnoses
504	481	End of follow-up	No chest pain	Serious cardiac diagnoses
505	481	End of follow-up	No chest pain	Serious cardiac diagnoses
506	482	End of follow-up	No chest pain	Serious cardiac diagnoses
507	483	End of follow-up	No chest pain	Serious cardiac diagnoses
508	483	End of follow-up	No chest pain	Serious cardiac diagnoses
509	484	End of follow-up	No chest pain	Serious cardiac diagnoses
510	484	End of follow-up	No chest pain	Serious cardiac diagnoses
511	486	End of follow-up	No chest pain	Serious cardiac diagnoses
512	487	End of follow-up	No chest pain	Serious cardiac diagnoses
513	488	End of follow-up	No chest pain	Serious cardiac diagnoses
514	488	End of follow-up	No chest pain	Serious cardiac diagnoses
515	490	End of follow-up	No chest pain	Serious cardiac diagnoses
516	491	End of follow-up	No chest pain	Serious cardiac diagnoses
517	492	End of follow-up	No chest pain	Serious cardiac diagnoses
518	493	End of follow-up	No chest pain	Serious cardiac diagnoses
519	494	End of follow-up	No chest pain	Serious cardiac diagnoses
520	496	End of follow-up	No chest pain	Serious cardiac diagnoses
521	497	End of follow-up	No chest pain	Serious cardiac diagnoses
522	497	End of follow-up	No chest pain	Serious cardiac diagnoses
523	497	End of follow-up	No chest pain	Serious cardiac diagnoses
524	498	End of follow-up	No chest pain	Serious cardiac diagnoses
525	498	End of follow-up	No chest pain	Serious cardiac diagnoses
526	499	End of follow-up	No chest pain	Serious cardiac diagnoses
527	501	End of follow-up	No chest pain	Serious cardiac diagnoses
528	502	End of follow-up	No chest pain	Serious cardiac diagnoses
529	503	End of follow-up	No chest pain	Serious cardiac diagnoses
530	504	End of follow-up	No chest pain	Serious cardiac diagnoses
531	504	End of follow-up	No chest pain	Serious cardiac diagnoses
532	504	End of follow-up	No chest pain	Serious cardiac diagnoses
533	505	End of follow-up	No chest pain	Serious cardiac diagnoses
534	507	End of follow-up	No chest pain	Serious cardiac diagnoses
535	508	End of follow-up	No chest pain	Serious cardiac diagnoses
536	509	End of follow-up	No chest pain	Serious cardiac diagnoses
537	510	End of follow-up	No chest pain	Serious cardiac diagnoses
538	512	End of follow-up	No chest pain	Serious cardiac diagnoses
539	514	End of follow-up	No chest pain	Serious cardiac diagnoses
540	514	End of follow-up	No chest pain	Serious cardiac diagnoses
541	515	End of follow-up	No chest pain	Serious cardiac diagnoses
542	515	End of follow-up	No chest pain	Serious cardiac diagnoses
543	515	End of follow-up	No chest pain	Serious cardiac diagnoses
544	518	End of follow-up	No chest pain	Serious cardiac diagnoses
545	518	End of follow-up	No chest pain	Serious cardiac diagnoses
546	518	End of follow-up	No chest pain	Serious cardiac diagnoses
547	520	End of follow-up	No chest pain	Serious cardiac diagnoses
548	520	End of follow-up	No chest pain	Serious cardiac diagnoses
549	521	End of follow-up	No chest pain	Serious cardiac diagnoses
550	521	End of follow-up	No chest pain	Serious cardiac diagnoses
551	522	End of follow-up	No chest pain	Serious cardiac diagnoses
552	522	End of follow-up	No chest pain	Serious cardiac diagnoses
553	523	End of follow-up	No chest pain	Serious cardiac diagnoses
554	523	End of follow-up	No chest pain	Serious cardiac diagnoses
555	523	End of follow-up	No chest pain	Serious cardiac diagnoses
556	524	End of follow-up	No chest pain	Serious cardiac diagnoses
557	524	End of follow-up	No chest pain	Serious cardiac diagnoses
558	524	End of follow-up	No chest pain	Serious cardiac diagnoses
559	525	End of follow-up	No chest pain	Serious cardiac diagnoses
560	525	End of follow-up	No chest pain	Serious cardiac diagnoses
561	526	End of follow-up	No chest pain	Serious cardiac diagnoses
562	527	End of follow-up	No chest pain	Serious cardiac diagnoses
563	528	End of follow-up	No chest pain	Serious cardiac diagnoses
564	528	End of follow-up	No chest pain	Serious cardiac diagnoses
565	529	End of follow-up	No chest pain	Serious cardiac diagnoses
566	529	End of follow-up	No chest pain	Serious cardiac diagnoses
567	529	End of follow-up	No chest pain	Serious cardiac diagnoses
568	530	End of follow-up	No chest pain	Serious cardiac diagnoses
569	530	End of follow-up	No chest pain	Serious cardiac diagnoses
570	531	End of follow-up	No chest pain	Serious cardiac diagnoses
571	531	End of follow-up	No chest pain	Serious cardiac diagnoses
572	532	End of follow-up	No chest pain	Serious cardiac diagnoses
573	532	End of follow-up	No chest pain	Serious cardiac diagnoses
574	532	End of follow-up	No chest pain	Serious cardiac diagnoses
575	532	End of follow-up	No chest pain	Serious cardiac diagnoses
576	533	End of follow-up	No chest pain	Serious cardiac diagnoses
577	533	End of follow-up	No chest pain	Serious cardiac diagnoses
578	534	End of follow-up	No chest pain	Serious cardiac diagnoses
579	534	End of follow-up	No chest pain	Serious cardiac diagnoses
580	534	End of follow-up	No chest pain	Serious cardiac diagnoses
581	535	End of follow-up	No chest pain	Serious cardiac diagnoses
582	536	End of follow-up	No chest pain	Serious cardiac diagnoses
583	536	End of follow-up	No chest pain	Serious cardiac diagnoses
584	538	End of follow-up	No chest pain	Serious cardiac diagnoses
585	538	End of follow-up	No chest pain	Serious cardiac diagnoses
586	538	End of follow-up	No chest pain	Serious cardiac diagnoses
587	538	End of follow-up	No chest pain	Serious cardiac diagnoses
588	538	End of follow-up	No chest pain	Serious cardiac diagnoses
589	540	End of follow-up	No chest pain	Serious cardiac diagnoses
590	541	End of follow-up	No chest pain	Serious cardiac diagnoses
591	542	End of follow-up	No chest pain	Serious cardiac diagnoses
592	543	End of follow-up	No chest pain	Serious cardiac diagnoses
593	543	End of follow-up	No chest pain	Serious cardiac diagnoses
594	544	End of follow-up	No chest pain	Serious cardiac diagnoses
595	544	End of follow-up	No chest pain	Serious cardiac diagnoses
596	544	End of follow-up	No chest pain	Serious cardiac diagnoses
597	545	End of follow-up	No chest pain	Serious cardiac diagnoses
598	545	End of follow-up	No chest pain	Serious cardiac diagnoses
599	545	End of follow-up	No chest pain	Serious cardiac diagnoses
600	546	End of follow-up	No chest pain	Serious cardiac diagnoses
601	546	End of follow-up	No chest pain	Serious cardiac diagnoses
602	546	End of follow-up	No chest pain	Serious cardiac diagnoses
603	547	End of follow-up	No chest pain	Serious cardiac diagnoses
604	548	End of follow-up	No chest pain	Serious cardiac diagnoses
605	548	End of follow-up	No chest pain	Serious cardiac diagnoses
606	548	End of follow-up	No chest pain	Serious cardiac diagnoses
607	548	End of follow-up	No chest pain	Serious cardiac diagnoses
608	548	End of follow-up	No chest pain	Serious cardiac diagnoses
609	549	End of follow-up	No chest pain	Serious cardiac diagnoses
610	550	End of follow-up	No chest pain	Serious cardiac diagnoses
611	550	End of follow-up	No chest pain	Serious cardiac diagnoses
612	550	End of follow-up	No chest pain	Serious cardiac diagnoses
613	551	End of follow-up	No chest pain	Serious cardiac diagnoses
614	552	End of follow-up	No chest pain	Serious cardiac diagnoses
615	552	End of follow-up	No chest pain	Serious cardiac diagnoses
616	552	End of follow-up	No chest pain	Serious cardiac diagnoses
617	552	End of follow-up	No chest pain	Serious cardiac diagnoses
618	553	End of follow-up	No chest pain	Serious cardiac diagnoses
619	553	End of follow-up	No chest pain	Serious cardiac diagnoses
620	553	End of follow-up	No chest pain	Serious cardiac diagnoses
621	553	End of follow-up	No chest pain	Serious cardiac diagnoses
622	553	End of follow-up	No chest pain	Serious cardiac diagnoses
623	554	End of follow-up	No chest pain	Serious cardiac diagnoses
624	555	End of follow-up	No chest pain	Serious cardiac diagnoses
625	555	End of follow-up	No chest pain	Serious cardiac diagnoses
626	556	End of follow-up	No chest pain	Serious cardiac diagnoses
627	556	End of follow-up	No chest pain	Serious cardiac diagnoses
628	556	End of follow-up	No chest pain	Serious cardiac diagnoses
629	556	End of follow-up	No chest pain	Serious cardiac diagnoses
630	557	End of follow-up	No chest pain	Serious cardiac diagnoses
631	557	End of follow-up	No chest pain	Serious cardiac diagnoses
632	557	End of follow-up	No chest pain	Serious cardiac diagnoses
633	558	End of follow-up	No chest pain	Serious cardiac diagnoses
634	558	End of follow-up	No chest pain	Serious cardiac diagnoses
635	558	End of follow-up	No chest pain	Serious cardiac diagnoses
636	559	End of follow-up	No chest pain	Serious cardiac diagnoses
637	559	End of follow-up	No chest pain	Serious cardiac diagnoses
638	559	End of follow-up	No chest pain	Serious cardiac diagnoses
639	559	End of follow-up	No chest pain	Serious cardiac diagnoses
640	559	End of follow-up	No chest pain	Serious cardiac diagnoses
641	560	End of follow-up	No chest pain	Serious cardiac diagnoses
642	560	End of follow-up	No chest pain	Serious cardiac diagnoses
643	560	End of follow-up	No chest pain	Serious cardiac diagnoses
644	560	End of follow-up	No chest pain	Serious cardiac diagnoses
645	561	End of follow-up	No chest pain	Serious cardiac diagnoses
646	561	End of follow-up	No chest pain	Serious cardiac diagnoses
647	561	End of follow-up	No chest pain	Serious cardiac diagnoses
648	561	End of follow-up	No chest pain	Serious cardiac diagnoses
649	562	End of follow-up	No chest pain	Serious cardiac diagnoses
650	562	End of follow-up	No chest pain	Serious cardiac diagnoses
651	562	End of follow-up	No chest pain	Serious cardiac diagnoses
652	563	End of follow-up	No chest pain	Serious cardiac diagnoses
653	563	End of follow-up	No chest pain	Serious cardiac diagnoses
654	563	End of follow-up	No chest pain	Serious cardiac diagnoses
655	563	End of follow-up	No chest pain	Serious cardiac diagnoses
656	563	End of follow-up	No chest pain	Serious cardiac diagnoses
657	0	Dead	No chest pain	Serious cardiac diagnoses
658	0	Dead	No chest pain	Serious cardiac diagnoses
659	0	Dead	No chest pain	Serious cardiac diagnoses
660	0	Dead	No chest pain	Serious cardiac diagnoses
661	0	Dead	No chest pain	Serious cardiac diagnoses
662	0	Dead	No chest pain	Serious cardiac diagnoses
663	0	Dead	No chest pain	Serious cardiac diagnoses
664	0	Dead	No chest pain	Serious cardiac diagnoses
665	0	Dead	No chest pain	Serious cardiac diagnoses
666	0	Dead	No chest pain	Serious cardiac diagnoses
667	0	Dead	No chest pain	Serious cardiac diagnoses
668	0	Dead	No chest pain	Serious cardiac diagnoses
669	0	Dead	No chest pain	Serious cardiac diagnoses
670	0	Dead	No chest pain	Serious cardiac diagnoses
671	0	Dead	No chest pain	Serious cardiac diagnoses
672	0	Dead	No chest pain	Serious cardiac diagnoses
673	0	Dead	No chest pain	Serious cardiac diagnoses
674	0	Dead	No chest pain	Serious cardiac diagnoses
675	0	Dead	No chest pain	Serious cardiac diagnoses
676	0	Dead	No chest pain	Serious cardiac diagnoses
677	0	Dead	No chest pain	Serious cardiac diagnoses
678	0	Dead	No chest pain	Serious cardiac diagnoses
679	0	Dead	No chest pain	Serious cardiac diagnoses
680	0	Dead	No chest pain	Serious cardiac diagnoses
681	0	Dead	No chest pain	Serious cardiac diagnoses
682	0	Dead	No chest pain	Serious cardiac diagnoses
683	0	Dead	No chest pain	Serious cardiac diagnoses
684	0	Dead	No chest pain	Serious cardiac diagnoses
685	0	Dead	No chest pain	Serious cardiac diagnoses
686	0	Dead	No chest pain	Serious cardiac diagnoses
687	0	Dead	No chest pain	Serious cardiac diagnoses
688	0	Dead	No chest pain	Serious cardiac diagnoses
689	0	Dead	No chest pain	Serious cardiac diagnoses
690	0	Dead	No chest pain	Serious cardiac diagnoses
691	0	Dead	No chest pain	Serious cardiac diagnoses
692	0	Dead	No chest pain	Serious cardiac diagnoses
693	0	Dead	No chest pain	Serious cardiac diagnoses
694	0	Dead	No chest pain	Serious cardiac diagnoses
695	0	Dead	No chest pain	Serious cardiac diagnoses
696	0	Dead	No chest pain	Serious cardiac diagnoses
697	0	Dead	No chest pain	Serious cardiac diagnoses
698	0	Dead	No chest pain	Serious cardiac diagnoses
699	0	Dead	No chest pain	Serious cardiac diagnoses
700	0	Dead	No chest pain	Serious cardiac diagnoses
701	0	Dead	No chest pain	Serious cardiac diagnoses
702	0	Dead	No chest pain	Serious cardiac diagnoses
703	0	Dead	No chest pain	Serious cardiac diagnoses
704	0	Dead	No chest pain	Serious cardiac diagnoses
705	0	Dead	No chest pain	Serious cardiac diagnoses
706	0	Dead	No chest pain	Serious cardiac diagnoses
707	0	Dead	No chest pain	Serious cardiac diagnoses
708	0	Dead	No chest pain	Serious cardiac diagnoses
709	0	Dead	No chest pain	Serious cardiac diagnoses
710	0	Dead	No chest pain	Serious cardiac diagnoses
711	0	Dead	No chest pain	Serious cardiac diagnoses
712	0	Dead	No chest pain	Serious cardiac diagnoses
713	0	Dead	No chest pain	Serious cardiac diagnoses
714	0	Dead	No chest pain	Serious cardiac diagnoses
715	0	Dead	No chest pain	Serious cardiac diagnoses
716	0	Dead	No chest pain	Serious cardiac diagnoses
717	0	Dead	No chest pain	Serious cardiac diagnoses
718	0	Dead	No chest pain	Serious cardiac diagnoses
719	0	Dead	No chest pain	Serious cardiac diagnoses
720	0	Dead	No chest pain	Serious cardiac diagnoses
721	0	Dead	No chest pain	Serious cardiac diagnoses
722	0	Dead	No chest pain	Serious cardiac diagnoses
723	0	Dead	No chest pain	Serious cardiac diagnoses
724	0	Dead	No chest pain	Serious cardiac diagnoses
725	0	Dead	No chest pain	Serious cardiac diagnoses
726	0	Dead	No chest pain	Serious cardiac diagnoses
727	0	Dead	No chest pain	Serious cardiac diagnoses
728	0	Dead	No chest pain	Serious cardiac diagnoses
729	0	Dead	No chest pain	Serious cardiac diagnoses
730	0	Dead	No chest pain	Serious cardiac diagnoses
731	0	Dead	No chest pain	Serious cardiac diagnoses
732	0	Dead	No chest pain	Serious cardiac diagnoses
733	0	Dead	No chest pain	Serious cardiac diagnoses
734	0	Dead	No chest pain	Serious cardiac diagnoses
735	0	Dead	No chest pain	Serious cardiac diagnoses
736	1	Dead	No chest pain	Serious cardiac diagnoses
737	1	Dead	No chest pain	Serious cardiac diagnoses
738	1	Dead	No chest pain	Serious cardiac diagnoses
739	1	Dead	No chest pain	Serious cardiac diagnoses
740	1	Dead	No chest pain	Serious cardiac diagnoses
741	1	Dead	No chest pain	Serious cardiac diagnoses
742	1	Dead	No chest pain	Serious cardiac diagnoses
743	1	Dead	No chest pain	Serious cardiac diagnoses
744	1	Dead	No chest pain	Serious cardiac diagnoses
745	1	Dead	No chest pain	Serious cardiac diagnoses
746	1	Dead	No chest pain	Serious cardiac diagnoses
747	1	Dead	No chest pain	Serious cardiac diagnoses
748	1	Dead	No chest pain	Serious cardiac diagnoses
749	1	Dead	No chest pain	Serious cardiac diagnoses
750	1	Dead	No chest pain	Serious cardiac diagnoses
751	1	Dead	No chest pain	Serious cardiac diagnoses
752	1	Dead	No chest pain	Serious cardiac diagnoses
753	1	Dead	No chest pain	Serious cardiac diagnoses
754	1	Dead	No chest pain	Serious cardiac diagnoses
755	1	Dead	No chest pain	Serious cardiac diagnoses
756	1	Dead	No chest pain	Serious cardiac diagnoses
757	1	Dead	No chest pain	Serious cardiac diagnoses
758	1	Dead	No chest pain	Serious cardiac diagnoses
759	1	Dead	No chest pain	Serious cardiac diagnoses
760	1	Dead	No chest pain	Serious cardiac diagnoses
761	1	Dead	No chest pain	Serious cardiac diagnoses
762	1	Dead	No chest pain	Serious cardiac diagnoses
763	1	Dead	No chest pain	Serious cardiac diagnoses
764	1	Dead	No chest pain	Serious cardiac diagnoses
765	1	Dead	No chest pain	Serious cardiac diagnoses
766	1	Dead	No chest pain	Serious cardiac diagnoses
767	1	Dead	No chest pain	Serious cardiac diagnoses
768	1	Dead	No chest pain	Serious cardiac diagnoses
769	1	Dead	No chest pain	Serious cardiac diagnoses
770	1	Dead	No chest pain	Serious cardiac diagnoses
771	2	Dead	No chest pain	Serious cardiac diagnoses
772	2	Dead	No chest pain	Serious cardiac diagnoses
773	2	Dead	No chest pain	Serious cardiac diagnoses
774	2	Dead	No chest pain	Serious cardiac diagnoses
775	2	Dead	No chest pain	Serious cardiac diagnoses
776	2	Dead	No chest pain	Serious cardiac diagnoses
777	2	Dead	No chest pain	Serious cardiac diagnoses
778	2	Dead	No chest pain	Serious cardiac diagnoses
779	2	Dead	No chest pain	Serious cardiac diagnoses
780	2	Dead	No chest pain	Serious cardiac diagnoses
781	2	Dead	No chest pain	Serious cardiac diagnoses
782	2	Dead	No chest pain	Serious cardiac diagnoses
783	2	Dead	No chest pain	Serious cardiac diagnoses
784	2	Dead	No chest pain	Serious cardiac diagnoses
785	2	Dead	No chest pain	Serious cardiac diagnoses
786	2	Dead	No chest pain	Serious cardiac diagnoses
787	2	Dead	No chest pain	Serious cardiac diagnoses
788	2	Dead	No chest pain	Serious cardiac diagnoses
789	2	Dead	No chest pain	Serious cardiac diagnoses
790	2	Dead	No chest pain	Serious cardiac diagnoses
791	3	Dead	No chest pain	Serious cardiac diagnoses
792	3	Dead	No chest pain	Serious cardiac diagnoses
793	3	Dead	No chest pain	Serious cardiac diagnoses
794	3	Dead	No chest pain	Serious cardiac diagnoses
795	3	Dead	No chest pain	Serious cardiac diagnoses
796	3	Dead	No chest pain	Serious cardiac diagnoses
797	3	Dead	No chest pain	Serious cardiac diagnoses
798	3	Dead	No chest pain	Serious cardiac diagnoses
799	3	Dead	No chest pain	Serious cardiac diagnoses
800	3	Dead	No chest pain	Serious cardiac diagnoses
801	3	Dead	No chest pain	Serious cardiac diagnoses
802	3	Dead	No chest pain	Serious cardiac diagnoses
803	3	Dead	No chest pain	Serious cardiac diagnoses
804	3	Dead	No chest pain	Serious cardiac diagnoses
805	3	Dead	No chest pain	Serious cardiac diagnoses
806	3	Dead	No chest pain	Serious cardiac diagnoses
807	3	Dead	No chest pain	Serious cardiac diagnoses
808	3	Dead	No chest pain	Serious cardiac diagnoses
809	3	Dead	No chest pain	Serious cardiac diagnoses
810	4	Dead	No chest pain	Serious cardiac diagnoses
811	4	Dead	No chest pain	Serious cardiac diagnoses
812	4	Dead	No chest pain	Serious cardiac diagnoses
813	4	Dead	No chest pain	Serious cardiac diagnoses
814	4	Dead	No chest pain	Serious cardiac diagnoses
815	4	Dead	No chest pain	Serious cardiac diagnoses
816	5	Dead	No chest pain	Serious cardiac diagnoses
817	5	Dead	No chest pain	Serious cardiac diagnoses
818	5	Dead	No chest pain	Serious cardiac diagnoses
819	5	Dead	No chest pain	Serious cardiac diagnoses
820	5	Dead	No chest pain	Serious cardiac diagnoses
821	5	Dead	No chest pain	Serious cardiac diagnoses
822	5	Dead	No chest pain	Serious cardiac diagnoses
823	6	Dead	No chest pain	Serious cardiac diagnoses
824	6	Dead	No chest pain	Serious cardiac diagnoses
825	7	Dead	No chest pain	Serious cardiac diagnoses
826	7	Dead	No chest pain	Serious cardiac diagnoses
827	7	Dead	No chest pain	Serious cardiac diagnoses
828	7	Dead	No chest pain	Serious cardiac diagnoses
829	7	Dead	No chest pain	Serious cardiac diagnoses
830	7	Dead	No chest pain	Serious cardiac diagnoses
831	7	Dead	No chest pain	Serious cardiac diagnoses
832	7	Dead	No chest pain	Serious cardiac diagnoses
833	8	Dead	No chest pain	Serious cardiac diagnoses
834	8	Dead	No chest pain	Serious cardiac diagnoses
835	8	Dead	No chest pain	Serious cardiac diagnoses
836	8	Dead	No chest pain	Serious cardiac diagnoses
837	8	Dead	No chest pain	Serious cardiac diagnoses
838	8	Dead	No chest pain	Serious cardiac diagnoses
839	8	Dead	No chest pain	Serious cardiac diagnoses
840	8	Dead	No chest pain	Serious cardiac diagnoses
841	9	Dead	No chest pain	Serious cardiac diagnoses
842	9	Dead	No chest pain	Serious cardiac diagnoses
843	9	Dead	No chest pain	Serious cardiac diagnoses
844	9	Dead	No chest pain	Serious cardiac diagnoses
845	10	Dead	No chest pain	Serious cardiac diagnoses
846	10	Dead	No chest pain	Serious cardiac diagnoses
847	11	Dead	No chest pain	Serious cardiac diagnoses
848	11	Dead	No chest pain	Serious cardiac diagnoses
849	11	Dead	No chest pain	Serious cardiac diagnoses
850	11	Dead	No chest pain	Serious cardiac diagnoses
851	11	Dead	No chest pain	Serious cardiac diagnoses
852	11	Dead	No chest pain	Serious cardiac diagnoses
853	12	Dead	No chest pain	Serious cardiac diagnoses
854	12	Dead	No chest pain	Serious cardiac diagnoses
855	12	Dead	No chest pain	Serious cardiac diagnoses
856	13	Dead	No chest pain	Serious cardiac diagnoses
857	13	Dead	No chest pain	Serious cardiac diagnoses
858	14	Dead	No chest pain	Serious cardiac diagnoses
859	14	Dead	No chest pain	Serious cardiac diagnoses
860	14	Dead	No chest pain	Serious cardiac diagnoses
861	15	Dead	No chest pain	Serious cardiac diagnoses
862	15	Dead	No chest pain	Serious cardiac diagnoses
863	17	Dead	No chest pain	Serious cardiac diagnoses
864	17	Dead	No chest pain	Serious cardiac diagnoses
865	17	Dead	No chest pain	Serious cardiac diagnoses
866	20	Dead	No chest pain	Serious cardiac diagnoses
867	22	Dead	No chest pain	Serious cardiac diagnoses
868	23	Dead	No chest pain	Serious cardiac diagnoses
869	24	Dead	No chest pain	Serious cardiac diagnoses
870	26	Dead	No chest pain	Serious cardiac diagnoses
871	26	Dead	No chest pain	Serious cardiac diagnoses
872	29	Dead	No chest pain	Serious cardiac diagnoses
873	31	End of follow-up	No chest pain	Other diagnoses
874	31	End of follow-up	No chest pain	Other diagnoses
875	31	End of follow-up	No chest pain	Other diagnoses
876	31	End of follow-up	No chest pain	Other diagnoses
877	31	End of follow-up	No chest pain	Other diagnoses
878	31	End of follow-up	No chest pain	Other diagnoses
879	31	End of follow-up	No chest pain	Other diagnoses
880	31	End of follow-up	No chest pain	Other diagnoses
881	31	End of follow-up	No chest pain	Other diagnoses
882	31	End of follow-up	No chest pain	Other diagnoses
883	31	End of follow-up	No chest pain	Other diagnoses
884	31	End of follow-up	No chest pain	Other diagnoses
885	31	End of follow-up	No chest pain	Other diagnoses
886	31	End of follow-up	No chest pain	Other diagnoses
887	31	End of follow-up	No chest pain	Other diagnoses
888	31	End of follow-up	No chest pain	Other diagnoses
889	32	End of follow-up	No chest pain	Other diagnoses
890	32	End of follow-up	No chest pain	Other diagnoses
891	32	End of follow-up	No chest pain	Other diagnoses
892	32	End of follow-up	No chest pain	Other diagnoses
893	32	End of follow-up	No chest pain	Other diagnoses
894	32	End of follow-up	No chest pain	Other diagnoses
895	32	End of follow-up	No chest pain	Other diagnoses
896	32	End of follow-up	No chest pain	Other diagnoses
897	32	End of follow-up	No chest pain	Other diagnoses
898	32	End of follow-up	No chest pain	Other diagnoses
899	32	End of follow-up	No chest pain	Other diagnoses
900	32	End of follow-up	No chest pain	Other diagnoses
901	32	End of follow-up	No chest pain	Other diagnoses
902	32	End of follow-up	No chest pain	Other diagnoses
903	32	End of follow-up	No chest pain	Other diagnoses
904	32	End of follow-up	No chest pain	Other diagnoses
905	32	End of follow-up	No chest pain	Other diagnoses
906	32	End of follow-up	No chest pain	Other diagnoses
907	32	End of follow-up	No chest pain	Other diagnoses
908	32	End of follow-up	No chest pain	Other diagnoses
909	32	End of follow-up	No chest pain	Other diagnoses
910	32	End of follow-up	No chest pain	Other diagnoses
911	32	End of follow-up	No chest pain	Other diagnoses
912	32	End of follow-up	No chest pain	Other diagnoses
913	32	End of follow-up	No chest pain	Other diagnoses
914	32	End of follow-up	No chest pain	Other diagnoses
915	32	End of follow-up	No chest pain	Other diagnoses
916	32	End of follow-up	No chest pain	Other diagnoses
917	32	End of follow-up	No chest pain	Other diagnoses
918	32	End of follow-up	No chest pain	Other diagnoses
919	33	End of follow-up	No chest pain	Other diagnoses
920	33	End of follow-up	No chest pain	Other diagnoses
921	33	End of follow-up	No chest pain	Other diagnoses
922	33	End of follow-up	No chest pain	Other diagnoses
923	33	End of follow-up	No chest pain	Other diagnoses
924	33	End of follow-up	No chest pain	Other diagnoses
925	33	End of follow-up	No chest pain	Other diagnoses
926	33	End of follow-up	No chest pain	Other diagnoses
927	33	End of follow-up	No chest pain	Other diagnoses
928	33	End of follow-up	No chest pain	Other diagnoses
929	33	End of follow-up	No chest pain	Other diagnoses
930	33	End of follow-up	No chest pain	Other diagnoses
931	33	End of follow-up	No chest pain	Other diagnoses
932	33	End of follow-up	No chest pain	Other diagnoses
933	33	End of follow-up	No chest pain	Other diagnoses
934	33	End of follow-up	No chest pain	Other diagnoses
935	33	End of follow-up	No chest pain	Other diagnoses
936	33	End of follow-up	No chest pain	Other diagnoses
937	34	End of follow-up	No chest pain	Other diagnoses
938	34	End of follow-up	No chest pain	Other diagnoses
939	34	End of follow-up	No chest pain	Other diagnoses
940	34	End of follow-up	No chest pain	Other diagnoses
941	34	End of follow-up	No chest pain	Other diagnoses
942	34	End of follow-up	No chest pain	Other diagnoses
943	34	End of follow-up	No chest pain	Other diagnoses
944	34	End of follow-up	No chest pain	Other diagnoses
945	34	End of follow-up	No chest pain	Other diagnoses
946	34	End of follow-up	No chest pain	Other diagnoses
947	34	End of follow-up	No chest pain	Other diagnoses
948	34	End of follow-up	No chest pain	Other diagnoses
949	34	End of follow-up	No chest pain	Other diagnoses
950	34	End of follow-up	No chest pain	Other diagnoses
951	34	End of follow-up	No chest pain	Other diagnoses
952	34	End of follow-up	No chest pain	Other diagnoses
953	34	End of follow-up	No chest pain	Other diagnoses
954	34	End of follow-up	No chest pain	Other diagnoses
955	34	End of follow-up	No chest pain	Other diagnoses
956	34	End of follow-up	No chest pain	Other diagnoses
957	34	End of follow-up	No chest pain	Other diagnoses
958	34	End of follow-up	No chest pain	Other diagnoses
959	34	End of follow-up	No chest pain	Other diagnoses
960	34	End of follow-up	No chest pain	Other diagnoses
961	35	End of follow-up	No chest pain	Other diagnoses
962	35	End of follow-up	No chest pain	Other diagnoses
963	35	End of follow-up	No chest pain	Other diagnoses
964	35	End of follow-up	No chest pain	Other diagnoses
965	35	End of follow-up	No chest pain	Other diagnoses
966	35	End of follow-up	No chest pain	Other diagnoses
967	35	End of follow-up	No chest pain	Other diagnoses
968	35	End of follow-up	No chest pain	Other diagnoses
969	35	End of follow-up	No chest pain	Other diagnoses
970	35	End of follow-up	No chest pain	Other diagnoses
971	35	End of follow-up	No chest pain	Other diagnoses
972	35	End of follow-up	No chest pain	Other diagnoses
973	35	End of follow-up	No chest pain	Other diagnoses
974	35	End of follow-up	No chest pain	Other diagnoses
975	35	End of follow-up	No chest pain	Other diagnoses
976	35	End of follow-up	No chest pain	Other diagnoses
977	35	End of follow-up	No chest pain	Other diagnoses
978	35	End of follow-up	No chest pain	Other diagnoses
979	35	End of follow-up	No chest pain	Other diagnoses
980	35	End of follow-up	No chest pain	Other diagnoses
981	35	End of follow-up	No chest pain	Other diagnoses
982	36	End of follow-up	No chest pain	Other diagnoses
983	36	End of follow-up	No chest pain	Other diagnoses
984	36	End of follow-up	No chest pain	Other diagnoses
985	36	End of follow-up	No chest pain	Other diagnoses
986	36	End of follow-up	No chest pain	Other diagnoses
987	36	End of follow-up	No chest pain	Other diagnoses
988	36	End of follow-up	No chest pain	Other diagnoses
989	36	End of follow-up	No chest pain	Other diagnoses
990	36	End of follow-up	No chest pain	Other diagnoses
991	36	End of follow-up	No chest pain	Other diagnoses
992	36	End of follow-up	No chest pain	Other diagnoses
993	36	End of follow-up	No chest pain	Other diagnoses
994	36	End of follow-up	No chest pain	Other diagnoses
995	36	End of follow-up	No chest pain	Other diagnoses
996	36	End of follow-up	No chest pain	Other diagnoses
997	36	End of follow-up	No chest pain	Other diagnoses
998	36	End of follow-up	No chest pain	Other diagnoses
999	36	End of follow-up	No chest pain	Other diagnoses
1000	36	End of follow-up	No chest pain	Other diagnoses
1001	36	End of follow-up	No chest pain	Other diagnoses
1002	36	End of follow-up	No chest pain	Other diagnoses
1003	37	End of follow-up	No chest pain	Other diagnoses
1004	37	End of follow-up	No chest pain	Other diagnoses
1005	37	End of follow-up	No chest pain	Other diagnoses
1006	37	End of follow-up	No chest pain	Other diagnoses
1007	37	End of follow-up	No chest pain	Other diagnoses
1008	37	End of follow-up	No chest pain	Other diagnoses
1009	37	End of follow-up	No chest pain	Other diagnoses
1010	37	End of follow-up	No chest pain	Other diagnoses
1011	37	End of follow-up	No chest pain	Other diagnoses
1012	37	End of follow-up	No chest pain	Other diagnoses
1013	37	End of follow-up	No chest pain	Other diagnoses
1014	37	End of follow-up	No chest pain	Other diagnoses
1015	37	End of follow-up	No chest pain	Other diagnoses
1016	37	End of follow-up	No chest pain	Other diagnoses
1017	37	End of follow-up	No chest pain	Other diagnoses
1018	37	End of follow-up	No chest pain	Other diagnoses
1019	37	End of follow-up	No chest pain	Other diagnoses
1020	37	End of follow-up	No chest pain	Other diagnoses
1021	37	End of follow-up	No chest pain	Other diagnoses
1022	37	End of follow-up	No chest pain	Other diagnoses
1023	37	End of follow-up	No chest pain	Other diagnoses
1024	37	End of follow-up	No chest pain	Other diagnoses
1025	37	End of follow-up	No chest pain	Other diagnoses
1026	37	End of follow-up	No chest pain	Other diagnoses
1027	37	End of follow-up	No chest pain	Other diagnoses
1028	38	End of follow-up	No chest pain	Other diagnoses
1029	38	End of follow-up	No chest pain	Other diagnoses
1030	38	End of follow-up	No chest pain	Other diagnoses
1031	38	End of follow-up	No chest pain	Other diagnoses
1032	38	End of follow-up	No chest pain	Other diagnoses
1033	38	End of follow-up	No chest pain	Other diagnoses
1034	38	End of follow-up	No chest pain	Other diagnoses
1035	38	End of follow-up	No chest pain	Other diagnoses
1036	38	End of follow-up	No chest pain	Other diagnoses
1037	38	End of follow-up	No chest pain	Other diagnoses
1038	38	End of follow-up	No chest pain	Other diagnoses
1039	38	End of follow-up	No chest pain	Other diagnoses
1040	38	End of follow-up	No chest pain	Other diagnoses
1041	38	End of follow-up	No chest pain	Other diagnoses
1042	38	End of follow-up	No chest pain	Other diagnoses
1043	38	End of follow-up	No chest pain	Other diagnoses
1044	38	End of follow-up	No chest pain	Other diagnoses
1045	38	End of follow-up	No chest pain	Other diagnoses
1046	38	End of follow-up	No chest pain	Other diagnoses
1047	39	End of follow-up	No chest pain	Other diagnoses
1048	39	End of follow-up	No chest pain	Other diagnoses
1049	39	End of follow-up	No chest pain	Other diagnoses
1050	39	End of follow-up	No chest pain	Other diagnoses
1051	39	End of follow-up	No chest pain	Other diagnoses
1052	39	End of follow-up	No chest pain	Other diagnoses
1053	39	End of follow-up	No chest pain	Other diagnoses
1054	39	End of follow-up	No chest pain	Other diagnoses
1055	39	End of follow-up	No chest pain	Other diagnoses
1056	40	End of follow-up	No chest pain	Other diagnoses
1057	40	End of follow-up	No chest pain	Other diagnoses
1058	40	End of follow-up	No chest pain	Other diagnoses
1059	40	End of follow-up	No chest pain	Other diagnoses
1060	40	End of follow-up	No chest pain	Other diagnoses
1061	40	End of follow-up	No chest pain	Other diagnoses
1062	40	End of follow-up	No chest pain	Other diagnoses
1063	40	End of follow-up	No chest pain	Other diagnoses
1064	40	End of follow-up	No chest pain	Other diagnoses
1065	40	End of follow-up	No chest pain	Other diagnoses
1066	40	End of follow-up	No chest pain	Other diagnoses
1067	40	End of follow-up	No chest pain	Other diagnoses
1068	40	End of follow-up	No chest pain	Other diagnoses
1069	40	End of follow-up	No chest pain	Other diagnoses
1070	40	End of follow-up	No chest pain	Other diagnoses
1071	40	End of follow-up	No chest pain	Other diagnoses
1072	41	End of follow-up	No chest pain	Other diagnoses
1073	41	End of follow-up	No chest pain	Other diagnoses
1074	41	End of follow-up	No chest pain	Other diagnoses
1075	41	End of follow-up	No chest pain	Other diagnoses
1076	41	End of follow-up	No chest pain	Other diagnoses
1077	41	End of follow-up	No chest pain	Other diagnoses
1078	41	End of follow-up	No chest pain	Other diagnoses
1079	41	End of follow-up	No chest pain	Other diagnoses
1080	41	End of follow-up	No chest pain	Other diagnoses
1081	41	End of follow-up	No chest pain	Other diagnoses
1082	41	End of follow-up	No chest pain	Other diagnoses
1083	41	End of follow-up	No chest pain	Other diagnoses
1084	41	End of follow-up	No chest pain	Other diagnoses
1085	41	End of follow-up	No chest pain	Other diagnoses
1086	41	End of follow-up	No chest pain	Other diagnoses
1087	41	End of follow-up	No chest pain	Other diagnoses
1088	41	End of follow-up	No chest pain	Other diagnoses
1089	41	End of follow-up	No chest pain	Other diagnoses
1090	41	End of follow-up	No chest pain	Other diagnoses
1091	42	End of follow-up	No chest pain	Other diagnoses
1092	42	End of follow-up	No chest pain	Other diagnoses
1093	42	End of follow-up	No chest pain	Other diagnoses
1094	42	End of follow-up	No chest pain	Other diagnoses
1095	42	End of follow-up	No chest pain	Other diagnoses
1096	42	End of follow-up	No chest pain	Other diagnoses
1097	42	End of follow-up	No chest pain	Other diagnoses
1098	42	End of follow-up	No chest pain	Other diagnoses
1099	42	End of follow-up	No chest pain	Other diagnoses
1100	42	End of follow-up	No chest pain	Other diagnoses
1101	42	End of follow-up	No chest pain	Other diagnoses
1102	42	End of follow-up	No chest pain	Other diagnoses
1103	42	End of follow-up	No chest pain	Other diagnoses
1104	42	End of follow-up	No chest pain	Other diagnoses
1105	42	End of follow-up	No chest pain	Other diagnoses
1106	42	End of follow-up	No chest pain	Other diagnoses
1107	42	End of follow-up	No chest pain	Other diagnoses
1108	42	End of follow-up	No chest pain	Other diagnoses
1109	42	End of follow-up	No chest pain	Other diagnoses
1110	42	End of follow-up	No chest pain	Other diagnoses
1111	42	End of follow-up	No chest pain	Other diagnoses
1112	42	End of follow-up	No chest pain	Other diagnoses
1113	42	End of follow-up	No chest pain	Other diagnoses
1114	42	End of follow-up	No chest pain	Other diagnoses
1115	42	End of follow-up	No chest pain	Other diagnoses
1116	42	End of follow-up	No chest pain	Other diagnoses
1117	42	End of follow-up	No chest pain	Other diagnoses
1118	42	End of follow-up	No chest pain	Other diagnoses
1119	42	End of follow-up	No chest pain	Other diagnoses
1120	42	End of follow-up	No chest pain	Other diagnoses
1121	43	End of follow-up	No chest pain	Other diagnoses
1122	43	End of follow-up	No chest pain	Other diagnoses
1123	43	End of follow-up	No chest pain	Other diagnoses
1124	43	End of follow-up	No chest pain	Other diagnoses
1125	43	End of follow-up	No chest pain	Other diagnoses
1126	43	End of follow-up	No chest pain	Other diagnoses
1127	43	End of follow-up	No chest pain	Other diagnoses
1128	43	End of follow-up	No chest pain	Other diagnoses
1129	43	End of follow-up	No chest pain	Other diagnoses
1130	43	End of follow-up	No chest pain	Other diagnoses
1131	43	End of follow-up	No chest pain	Other diagnoses
1132	43	End of follow-up	No chest pain	Other diagnoses
1133	43	End of follow-up	No chest pain	Other diagnoses
1134	43	End of follow-up	No chest pain	Other diagnoses
1135	43	End of follow-up	No chest pain	Other diagnoses
1136	44	End of follow-up	No chest pain	Other diagnoses
1137	44	End of follow-up	No chest pain	Other diagnoses
1138	44	End of follow-up	No chest pain	Other diagnoses
1139	44	End of follow-up	No chest pain	Other diagnoses
1140	44	End of follow-up	No chest pain	Other diagnoses
1141	44	End of follow-up	No chest pain	Other diagnoses
1142	44	End of follow-up	No chest pain	Other diagnoses
1143	44	End of follow-up	No chest pain	Other diagnoses
1144	44	End of follow-up	No chest pain	Other diagnoses
1145	44	End of follow-up	No chest pain	Other diagnoses
1146	44	End of follow-up	No chest pain	Other diagnoses
1147	44	End of follow-up	No chest pain	Other diagnoses
1148	44	End of follow-up	No chest pain	Other diagnoses
1149	44	End of follow-up	No chest pain	Other diagnoses
1150	44	End of follow-up	No chest pain	Other diagnoses
1151	44	End of follow-up	No chest pain	Other diagnoses
1152	44	End of follow-up	No chest pain	Other diagnoses
1153	44	End of follow-up	No chest pain	Other diagnoses
1154	44	End of follow-up	No chest pain	Other diagnoses
1155	44	End of follow-up	No chest pain	Other diagnoses
1156	44	End of follow-up	No chest pain	Other diagnoses
1157	44	End of follow-up	No chest pain	Other diagnoses
1158	44	End of follow-up	No chest pain	Other diagnoses
1159	44	End of follow-up	No chest pain	Other diagnoses
1160	44	End of follow-up	No chest pain	Other diagnoses
1161	45	End of follow-up	No chest pain	Other diagnoses
1162	45	End of follow-up	No chest pain	Other diagnoses
1163	45	End of follow-up	No chest pain	Other diagnoses
1164	45	End of follow-up	No chest pain	Other diagnoses
1165	45	End of follow-up	No chest pain	Other diagnoses
1166	45	End of follow-up	No chest pain	Other diagnoses
1167	45	End of follow-up	No chest pain	Other diagnoses
1168	45	End of follow-up	No chest pain	Other diagnoses
1169	45	End of follow-up	No chest pain	Other diagnoses
1170	45	End of follow-up	No chest pain	Other diagnoses
1171	45	End of follow-up	No chest pain	Other diagnoses
1172	45	End of follow-up	No chest pain	Other diagnoses
1173	45	End of follow-up	No chest pain	Other diagnoses
1174	45	End of follow-up	No chest pain	Other diagnoses
1175	45	End of follow-up	No chest pain	Other diagnoses
1176	45	End of follow-up	No chest pain	Other diagnoses
1177	45	End of follow-up	No chest pain	Other diagnoses
1178	45	End of follow-up	No chest pain	Other diagnoses
1179	45	End of follow-up	No chest pain	Other diagnoses
1180	45	End of follow-up	No chest pain	Other diagnoses
1181	45	End of follow-up	No chest pain	Other diagnoses
1182	45	End of follow-up	No chest pain	Other diagnoses
1183	46	End of follow-up	No chest pain	Other diagnoses
1184	46	End of follow-up	No chest pain	Other diagnoses
1185	46	End of follow-up	No chest pain	Other diagnoses
1186	46	End of follow-up	No chest pain	Other diagnoses
1187	46	End of follow-up	No chest pain	Other diagnoses
1188	46	End of follow-up	No chest pain	Other diagnoses
1189	46	End of follow-up	No chest pain	Other diagnoses
1190	46	End of follow-up	No chest pain	Other diagnoses
1191	46	End of follow-up	No chest pain	Other diagnoses
1192	46	End of follow-up	No chest pain	Other diagnoses
1193	46	End of follow-up	No chest pain	Other diagnoses
1194	46	End of follow-up	No chest pain	Other diagnoses
1195	46	End of follow-up	No chest pain	Other diagnoses
1196	46	End of follow-up	No chest pain	Other diagnoses
1197	46	End of follow-up	No chest pain	Other diagnoses
1198	47	End of follow-up	No chest pain	Other diagnoses
1199	47	End of follow-up	No chest pain	Other diagnoses
1200	47	End of follow-up	No chest pain	Other diagnoses
1201	47	End of follow-up	No chest pain	Other diagnoses
1202	47	End of follow-up	No chest pain	Other diagnoses
1203	47	End of follow-up	No chest pain	Other diagnoses
1204	47	End of follow-up	No chest pain	Other diagnoses
1205	47	End of follow-up	No chest pain	Other diagnoses
1206	47	End of follow-up	No chest pain	Other diagnoses
1207	47	End of follow-up	No chest pain	Other diagnoses
1208	47	End of follow-up	No chest pain	Other diagnoses
1209	47	End of follow-up	No chest pain	Other diagnoses
1210	47	End of follow-up	No chest pain	Other diagnoses
1211	47	End of follow-up	No chest pain	Other diagnoses
1212	47	End of follow-up	No chest pain	Other diagnoses
1213	47	End of follow-up	No chest pain	Other diagnoses
1214	47	End of follow-up	No chest pain	Other diagnoses
1215	47	End of follow-up	No chest pain	Other diagnoses
1216	47	End of follow-up	No chest pain	Other diagnoses
1217	47	End of follow-up	No chest pain	Other diagnoses
1218	47	End of follow-up	No chest pain	Other diagnoses
1219	48	End of follow-up	No chest pain	Other diagnoses
1220	48	End of follow-up	No chest pain	Other diagnoses
1221	48	End of follow-up	No chest pain	Other diagnoses
1222	48	End of follow-up	No chest pain	Other diagnoses
1223	48	End of follow-up	No chest pain	Other diagnoses
1224	48	End of follow-up	No chest pain	Other diagnoses
1225	48	End of follow-up	No chest pain	Other diagnoses
1226	48	End of follow-up	No chest pain	Other diagnoses
1227	48	End of follow-up	No chest pain	Other diagnoses
1228	48	End of follow-up	No chest pain	Other diagnoses
1229	48	End of follow-up	No chest pain	Other diagnoses
1230	48	End of follow-up	No chest pain	Other diagnoses
1231	48	End of follow-up	No chest pain	Other diagnoses
1232	49	End of follow-up	No chest pain	Other diagnoses
1233	49	End of follow-up	No chest pain	Other diagnoses
1234	49	End of follow-up	No chest pain	Other diagnoses
1235	49	End of follow-up	No chest pain	Other diagnoses
1236	49	End of follow-up	No chest pain	Other diagnoses
1237	49	End of follow-up	No chest pain	Other diagnoses
1238	49	End of follow-up	No chest pain	Other diagnoses
1239	49	End of follow-up	No chest pain	Other diagnoses
1240	49	End of follow-up	No chest pain	Other diagnoses
1241	49	End of follow-up	No chest pain	Other diagnoses
1242	49	End of follow-up	No chest pain	Other diagnoses
1243	49	End of follow-up	No chest pain	Other diagnoses
1244	49	End of follow-up	No chest pain	Other diagnoses
1245	49	End of follow-up	No chest pain	Other diagnoses
1246	49	End of follow-up	No chest pain	Other diagnoses
1247	49	End of follow-up	No chest pain	Other diagnoses
1248	49	End of follow-up	No chest pain	Other diagnoses
1249	49	End of follow-up	No chest pain	Other diagnoses
1250	49	End of follow-up	No chest pain	Other diagnoses
1251	49	End of follow-up	No chest pain	Other diagnoses
1252	49	End of follow-up	No chest pain	Other diagnoses
1253	50	End of follow-up	No chest pain	Other diagnoses
1254	50	End of follow-up	No chest pain	Other diagnoses
1255	50	End of follow-up	No chest pain	Other diagnoses
1256	50	End of follow-up	No chest pain	Other diagnoses
1257	50	End of follow-up	No chest pain	Other diagnoses
1258	50	End of follow-up	No chest pain	Other diagnoses
1259	50	End of follow-up	No chest pain	Other diagnoses
1260	50	End of follow-up	No chest pain	Other diagnoses
1261	50	End of follow-up	No chest pain	Other diagnoses
1262	50	End of follow-up	No chest pain	Other diagnoses
1263	50	End of follow-up	No chest pain	Other diagnoses
1264	50	End of follow-up	No chest pain	Other diagnoses
1265	50	End of follow-up	No chest pain	Other diagnoses
1266	50	End of follow-up	No chest pain	Other diagnoses
1267	50	End of follow-up	No chest pain	Other diagnoses
1268	50	End of follow-up	No chest pain	Other diagnoses
1269	50	End of follow-up	No chest pain	Other diagnoses
1270	51	End of follow-up	No chest pain	Other diagnoses
1271	51	End of follow-up	No chest pain	Other diagnoses
1272	51	End of follow-up	No chest pain	Other diagnoses
1273	51	End of follow-up	No chest pain	Other diagnoses
1274	51	End of follow-up	No chest pain	Other diagnoses
1275	51	End of follow-up	No chest pain	Other diagnoses
1276	51	End of follow-up	No chest pain	Other diagnoses
1277	51	End of follow-up	No chest pain	Other diagnoses
1278	51	End of follow-up	No chest pain	Other diagnoses
1279	51	End of follow-up	No chest pain	Other diagnoses
1280	51	End of follow-up	No chest pain	Other diagnoses
1281	51	End of follow-up	No chest pain	Other diagnoses
1282	51	End of follow-up	No chest pain	Other diagnoses
1283	51	End of follow-up	No chest pain	Other diagnoses
1284	51	End of follow-up	No chest pain	Other diagnoses
1285	51	End of follow-up	No chest pain	Other diagnoses
1286	51	End of follow-up	No chest pain	Other diagnoses
1287	51	End of follow-up	No chest pain	Other diagnoses
1288	51	End of follow-up	No chest pain	Other diagnoses
1289	52	End of follow-up	No chest pain	Other diagnoses
1290	52	End of follow-up	No chest pain	Other diagnoses
1291	52	End of follow-up	No chest pain	Other diagnoses
1292	52	End of follow-up	No chest pain	Other diagnoses
1293	52	End of follow-up	No chest pain	Other diagnoses
1294	52	End of follow-up	No chest pain	Other diagnoses
1295	52	End of follow-up	No chest pain	Other diagnoses
1296	52	End of follow-up	No chest pain	Other diagnoses
1297	52	End of follow-up	No chest pain	Other diagnoses
1298	52	End of follow-up	No chest pain	Other diagnoses
1299	52	End of follow-up	No chest pain	Other diagnoses
1300	52	End of follow-up	No chest pain	Other diagnoses
1301	52	End of follow-up	No chest pain	Other diagnoses
1302	52	End of follow-up	No chest pain	Other diagnoses
1303	52	End of follow-up	No chest pain	Other diagnoses
1304	52	End of follow-up	No chest pain	Other diagnoses
1305	52	End of follow-up	No chest pain	Other diagnoses
1306	52	End of follow-up	No chest pain	Other diagnoses
1307	52	End of follow-up	No chest pain	Other diagnoses
1308	52	End of follow-up	No chest pain	Other diagnoses
1309	52	End of follow-up	No chest pain	Other diagnoses
1310	52	End of follow-up	No chest pain	Other diagnoses
1311	52	End of follow-up	No chest pain	Other diagnoses
1312	53	End of follow-up	No chest pain	Other diagnoses
1313	53	End of follow-up	No chest pain	Other diagnoses
1314	53	End of follow-up	No chest pain	Other diagnoses
1315	53	End of follow-up	No chest pain	Other diagnoses
1316	53	End of follow-up	No chest pain	Other diagnoses
1317	53	End of follow-up	No chest pain	Other diagnoses
1318	53	End of follow-up	No chest pain	Other diagnoses
1319	53	End of follow-up	No chest pain	Other diagnoses
1320	53	End of follow-up	No chest pain	Other diagnoses
1321	53	End of follow-up	No chest pain	Other diagnoses
1322	53	End of follow-up	No chest pain	Other diagnoses
1323	53	End of follow-up	No chest pain	Other diagnoses
1324	53	End of follow-up	No chest pain	Other diagnoses
1325	53	End of follow-up	No chest pain	Other diagnoses
1326	53	End of follow-up	No chest pain	Other diagnoses
1327	53	End of follow-up	No chest pain	Other diagnoses
1328	54	End of follow-up	No chest pain	Other diagnoses
1329	54	End of follow-up	No chest pain	Other diagnoses
1330	54	End of follow-up	No chest pain	Other diagnoses
1331	54	End of follow-up	No chest pain	Other diagnoses
1332	54	End of follow-up	No chest pain	Other diagnoses
1333	54	End of follow-up	No chest pain	Other diagnoses
1334	54	End of follow-up	No chest pain	Other diagnoses
1335	54	End of follow-up	No chest pain	Other diagnoses
1336	54	End of follow-up	No chest pain	Other diagnoses
1337	54	End of follow-up	No chest pain	Other diagnoses
1338	54	End of follow-up	No chest pain	Other diagnoses
1339	54	End of follow-up	No chest pain	Other diagnoses
1340	54	End of follow-up	No chest pain	Other diagnoses
1341	54	End of follow-up	No chest pain	Other diagnoses
1342	54	End of follow-up	No chest pain	Other diagnoses
1343	54	End of follow-up	No chest pain	Other diagnoses
1344	54	End of follow-up	No chest pain	Other diagnoses
1345	54	End of follow-up	No chest pain	Other diagnoses
1346	54	End of follow-up	No chest pain	Other diagnoses
1347	55	End of follow-up	No chest pain	Other diagnoses
1348	55	End of follow-up	No chest pain	Other diagnoses
1349	55	End of follow-up	No chest pain	Other diagnoses
1350	55	End of follow-up	No chest pain	Other diagnoses
1351	55	End of follow-up	No chest pain	Other diagnoses
1352	55	End of follow-up	No chest pain	Other diagnoses
1353	55	End of follow-up	No chest pain	Other diagnoses
1354	55	End of follow-up	No chest pain	Other diagnoses
1355	55	End of follow-up	No chest pain	Other diagnoses
1356	55	End of follow-up	No chest pain	Other diagnoses
1357	55	End of follow-up	No chest pain	Other diagnoses
1358	55	End of follow-up	No chest pain	Other diagnoses
1359	55	End of follow-up	No chest pain	Other diagnoses
1360	55	End of follow-up	No chest pain	Other diagnoses
1361	55	End of follow-up	No chest pain	Other diagnoses
1362	55	End of follow-up	No chest pain	Other diagnoses
1363	56	End of follow-up	No chest pain	Other diagnoses
1364	56	End of follow-up	No chest pain	Other diagnoses
1365	56	End of follow-up	No chest pain	Other diagnoses
1366	56	End of follow-up	No chest pain	Other diagnoses
1367	56	End of follow-up	No chest pain	Other diagnoses
1368	56	End of follow-up	No chest pain	Other diagnoses
1369	56	End of follow-up	No chest pain	Other diagnoses
1370	56	End of follow-up	No chest pain	Other diagnoses
1371	56	End of follow-up	No chest pain	Other diagnoses
1372	56	End of follow-up	No chest pain	Other diagnoses
1373	56	End of follow-up	No chest pain	Other diagnoses
1374	56	End of follow-up	No chest pain	Other diagnoses
1375	56	End of follow-up	No chest pain	Other diagnoses
1376	56	End of follow-up	No chest pain	Other diagnoses
1377	56	End of follow-up	No chest pain	Other diagnoses
1378	56	End of follow-up	No chest pain	Other diagnoses
1379	56	End of follow-up	No chest pain	Other diagnoses
1380	56	End of follow-up	No chest pain	Other diagnoses
1381	56	End of follow-up	No chest pain	Other diagnoses
1382	56	End of follow-up	No chest pain	Other diagnoses
1383	56	End of follow-up	No chest pain	Other diagnoses
1384	57	End of follow-up	No chest pain	Other diagnoses
1385	57	End of follow-up	No chest pain	Other diagnoses
1386	57	End of follow-up	No chest pain	Other diagnoses
1387	57	End of follow-up	No chest pain	Other diagnoses
1388	57	End of follow-up	No chest pain	Other diagnoses
1389	57	End of follow-up	No chest pain	Other diagnoses
1390	57	End of follow-up	No chest pain	Other diagnoses
1391	57	End of follow-up	No chest pain	Other diagnoses
1392	57	End of follow-up	No chest pain	Other diagnoses
1393	57	End of follow-up	No chest pain	Other diagnoses
1394	57	End of follow-up	No chest pain	Other diagnoses
1395	57	End of follow-up	No chest pain	Other diagnoses
1396	57	End of follow-up	No chest pain	Other diagnoses
1397	57	End of follow-up	No chest pain	Other diagnoses
1398	57	End of follow-up	No chest pain	Other diagnoses
1399	57	End of follow-up	No chest pain	Other diagnoses
1400	57	End of follow-up	No chest pain	Other diagnoses
1401	57	End of follow-up	No chest pain	Other diagnoses
1402	57	End of follow-up	No chest pain	Other diagnoses
1403	57	End of follow-up	No chest pain	Other diagnoses
1404	57	End of follow-up	No chest pain	Other diagnoses
1405	58	End of follow-up	No chest pain	Other diagnoses
1406	58	End of follow-up	No chest pain	Other diagnoses
1407	58	End of follow-up	No chest pain	Other diagnoses
1408	58	End of follow-up	No chest pain	Other diagnoses
1409	58	End of follow-up	No chest pain	Other diagnoses
1410	58	End of follow-up	No chest pain	Other diagnoses
1411	58	End of follow-up	No chest pain	Other diagnoses
1412	58	End of follow-up	No chest pain	Other diagnoses
1413	58	End of follow-up	No chest pain	Other diagnoses
1414	58	End of follow-up	No chest pain	Other diagnoses
1415	58	End of follow-up	No chest pain	Other diagnoses
1416	58	End of follow-up	No chest pain	Other diagnoses
1417	58	End of follow-up	No chest pain	Other diagnoses
1418	58	End of follow-up	No chest pain	Other diagnoses
1419	58	End of follow-up	No chest pain	Other diagnoses
1420	58	End of follow-up	No chest pain	Other diagnoses
1421	58	End of follow-up	No chest pain	Other diagnoses
1422	58	End of follow-up	No chest pain	Other diagnoses
1423	58	End of follow-up	No chest pain	Other diagnoses
1424	58	End of follow-up	No chest pain	Other diagnoses
1425	58	End of follow-up	No chest pain	Other diagnoses
1426	59	End of follow-up	No chest pain	Other diagnoses
1427	59	End of follow-up	No chest pain	Other diagnoses
1428	59	End of follow-up	No chest pain	Other diagnoses
1429	59	End of follow-up	No chest pain	Other diagnoses
1430	59	End of follow-up	No chest pain	Other diagnoses
1431	59	End of follow-up	No chest pain	Other diagnoses
1432	59	End of follow-up	No chest pain	Other diagnoses
1433	59	End of follow-up	No chest pain	Other diagnoses
1434	59	End of follow-up	No chest pain	Other diagnoses
1435	59	End of follow-up	No chest pain	Other diagnoses
1436	59	End of follow-up	No chest pain	Other diagnoses
1437	59	End of follow-up	No chest pain	Other diagnoses
1438	59	End of follow-up	No chest pain	Other diagnoses
1439	59	End of follow-up	No chest pain	Other diagnoses
1440	59	End of follow-up	No chest pain	Other diagnoses
1441	60	End of follow-up	No chest pain	Other diagnoses
1442	60	End of follow-up	No chest pain	Other diagnoses
1443	60	End of follow-up	No chest pain	Other diagnoses
1444	60	End of follow-up	No chest pain	Other diagnoses
1445	60	End of follow-up	No chest pain	Other diagnoses
1446	60	End of follow-up	No chest pain	Other diagnoses
1447	60	End of follow-up	No chest pain	Other diagnoses
1448	60	End of follow-up	No chest pain	Other diagnoses
1449	60	End of follow-up	No chest pain	Other diagnoses
1450	60	End of follow-up	No chest pain	Other diagnoses
1451	60	End of follow-up	No chest pain	Other diagnoses
1452	60	End of follow-up	No chest pain	Other diagnoses
1453	60	End of follow-up	No chest pain	Other diagnoses
1454	60	End of follow-up	No chest pain	Other diagnoses
1455	60	End of follow-up	No chest pain	Other diagnoses
1456	60	End of follow-up	No chest pain	Other diagnoses
1457	60	End of follow-up	No chest pain	Other diagnoses
1458	60	End of follow-up	No chest pain	Other diagnoses
1459	61	End of follow-up	No chest pain	Other diagnoses
1460	61	End of follow-up	No chest pain	Other diagnoses
1461	61	End of follow-up	No chest pain	Other diagnoses
1462	61	End of follow-up	No chest pain	Other diagnoses
1463	61	End of follow-up	No chest pain	Other diagnoses
1464	61	End of follow-up	No chest pain	Other diagnoses
1465	61	End of follow-up	No chest pain	Other diagnoses
1466	61	End of follow-up	No chest pain	Other diagnoses
1467	61	End of follow-up	No chest pain	Other diagnoses
1468	61	End of follow-up	No chest pain	Other diagnoses
1469	61	End of follow-up	No chest pain	Other diagnoses
1470	61	End of follow-up	No chest pain	Other diagnoses
1471	61	End of follow-up	No chest pain	Other diagnoses
1472	61	End of follow-up	No chest pain	Other diagnoses
1473	61	End of follow-up	No chest pain	Other diagnoses
1474	61	End of follow-up	No chest pain	Other diagnoses
1475	62	End of follow-up	No chest pain	Other diagnoses
1476	62	End of follow-up	No chest pain	Other diagnoses
1477	62	End of follow-up	No chest pain	Other diagnoses
1478	62	End of follow-up	No chest pain	Other diagnoses
1479	62	End of follow-up	No chest pain	Other diagnoses
1480	62	End of follow-up	No chest pain	Other diagnoses
1481	62	End of follow-up	No chest pain	Other diagnoses
1482	62	End of follow-up	No chest pain	Other diagnoses
1483	62	End of follow-up	No chest pain	Other diagnoses
1484	62	End of follow-up	No chest pain	Other diagnoses
1485	62	End of follow-up	No chest pain	Other diagnoses
1486	62	End of follow-up	No chest pain	Other diagnoses
1487	63	End of follow-up	No chest pain	Other diagnoses
1488	63	End of follow-up	No chest pain	Other diagnoses
1489	63	End of follow-up	No chest pain	Other diagnoses
1490	63	End of follow-up	No chest pain	Other diagnoses
1491	63	End of follow-up	No chest pain	Other diagnoses
1492	63	End of follow-up	No chest pain	Other diagnoses
1493	63	End of follow-up	No chest pain	Other diagnoses
1494	63	End of follow-up	No chest pain	Other diagnoses
1495	63	End of follow-up	No chest pain	Other diagnoses
1496	63	End of follow-up	No chest pain	Other diagnoses
1497	64	End of follow-up	No chest pain	Other diagnoses
1498	64	End of follow-up	No chest pain	Other diagnoses
1499	64	End of follow-up	No chest pain	Other diagnoses
1500	64	End of follow-up	No chest pain	Other diagnoses
1501	64	End of follow-up	No chest pain	Other diagnoses
1502	64	End of follow-up	No chest pain	Other diagnoses
1503	64	End of follow-up	No chest pain	Other diagnoses
1504	64	End of follow-up	No chest pain	Other diagnoses
1505	64	End of follow-up	No chest pain	Other diagnoses
1506	64	End of follow-up	No chest pain	Other diagnoses
1507	64	End of follow-up	No chest pain	Other diagnoses
1508	64	End of follow-up	No chest pain	Other diagnoses
1509	64	End of follow-up	No chest pain	Other diagnoses
1510	65	End of follow-up	No chest pain	Other diagnoses
1511	65	End of follow-up	No chest pain	Other diagnoses
1512	65	End of follow-up	No chest pain	Other diagnoses
1513	65	End of follow-up	No chest pain	Other diagnoses
1514	65	End of follow-up	No chest pain	Other diagnoses
1515	65	End of follow-up	No chest pain	Other diagnoses
1516	65	End of follow-up	No chest pain	Other diagnoses
1517	65	End of follow-up	No chest pain	Other diagnoses
1518	65	End of follow-up	No chest pain	Other diagnoses
1519	65	End of follow-up	No chest pain	Other diagnoses
1520	65	End of follow-up	No chest pain	Other diagnoses
1521	65	End of follow-up	No chest pain	Other diagnoses
1522	65	End of follow-up	No chest pain	Other diagnoses
1523	65	End of follow-up	No chest pain	Other diagnoses
1524	65	End of follow-up	No chest pain	Other diagnoses
1525	65	End of follow-up	No chest pain	Other diagnoses
1526	65	End of follow-up	No chest pain	Other diagnoses
1527	66	End of follow-up	No chest pain	Other diagnoses
1528	66	End of follow-up	No chest pain	Other diagnoses
1529	66	End of follow-up	No chest pain	Other diagnoses
1530	66	End of follow-up	No chest pain	Other diagnoses
1531	66	End of follow-up	No chest pain	Other diagnoses
1532	66	End of follow-up	No chest pain	Other diagnoses
1533	66	End of follow-up	No chest pain	Other diagnoses
1534	66	End of follow-up	No chest pain	Other diagnoses
1535	66	End of follow-up	No chest pain	Other diagnoses
1536	66	End of follow-up	No chest pain	Other diagnoses
1537	66	End of follow-up	No chest pain	Other diagnoses
1538	66	End of follow-up	No chest pain	Other diagnoses
1539	66	End of follow-up	No chest pain	Other diagnoses
1540	66	End of follow-up	No chest pain	Other diagnoses
1541	66	End of follow-up	No chest pain	Other diagnoses
1542	66	End of follow-up	No chest pain	Other diagnoses
1543	66	End of follow-up	No chest pain	Other diagnoses
1544	66	End of follow-up	No chest pain	Other diagnoses
1545	67	End of follow-up	No chest pain	Other diagnoses
1546	67	End of follow-up	No chest pain	Other diagnoses
1547	67	End of follow-up	No chest pain	Other diagnoses
1548	67	End of follow-up	No chest pain	Other diagnoses
1549	67	End of follow-up	No chest pain	Other diagnoses
1550	67	End of follow-up	No chest pain	Other diagnoses
1551	67	End of follow-up	No chest pain	Other diagnoses
1552	67	End of follow-up	No chest pain	Other diagnoses
1553	67	End of follow-up	No chest pain	Other diagnoses
1554	67	End of follow-up	No chest pain	Other diagnoses
1555	67	End of follow-up	No chest pain	Other diagnoses
1556	67	End of follow-up	No chest pain	Other diagnoses
1557	67	End of follow-up	No chest pain	Other diagnoses
1558	67	End of follow-up	No chest pain	Other diagnoses
1559	67	End of follow-up	No chest pain	Other diagnoses
1560	67	End of follow-up	No chest pain	Other diagnoses
1561	68	End of follow-up	No chest pain	Other diagnoses
1562	68	End of follow-up	No chest pain	Other diagnoses
1563	68	End of follow-up	No chest pain	Other diagnoses
1564	68	End of follow-up	No chest pain	Other diagnoses
1565	68	End of follow-up	No chest pain	Other diagnoses
1566	68	End of follow-up	No chest pain	Other diagnoses
1567	68	End of follow-up	No chest pain	Other diagnoses
1568	68	End of follow-up	No chest pain	Other diagnoses
1569	68	End of follow-up	No chest pain	Other diagnoses
1570	68	End of follow-up	No chest pain	Other diagnoses
1571	68	End of follow-up	No chest pain	Other diagnoses
1572	68	End of follow-up	No chest pain	Other diagnoses
1573	68	End of follow-up	No chest pain	Other diagnoses
1574	69	End of follow-up	No chest pain	Other diagnoses
1575	69	End of follow-up	No chest pain	Other diagnoses
1576	69	End of follow-up	No chest pain	Other diagnoses
1577	69	End of follow-up	No chest pain	Other diagnoses
1578	69	End of follow-up	No chest pain	Other diagnoses
1579	69	End of follow-up	No chest pain	Other diagnoses
1580	69	End of follow-up	No chest pain	Other diagnoses
1581	69	End of follow-up	No chest pain	Other diagnoses
1582	69	End of follow-up	No chest pain	Other diagnoses
1583	69	End of follow-up	No chest pain	Other diagnoses
1584	69	End of follow-up	No chest pain	Other diagnoses
1585	70	End of follow-up	No chest pain	Other diagnoses
1586	70	End of follow-up	No chest pain	Other diagnoses
1587	70	End of follow-up	No chest pain	Other diagnoses
1588	70	End of follow-up	No chest pain	Other diagnoses
1589	70	End of follow-up	No chest pain	Other diagnoses
1590	70	End of follow-up	No chest pain	Other diagnoses
1591	70	End of follow-up	No chest pain	Other diagnoses
1592	70	End of follow-up	No chest pain	Other diagnoses
1593	70	End of follow-up	No chest pain	Other diagnoses
1594	70	End of follow-up	No chest pain	Other diagnoses
1595	70	End of follow-up	No chest pain	Other diagnoses
1596	71	End of follow-up	No chest pain	Other diagnoses
1597	71	End of follow-up	No chest pain	Other diagnoses
1598	71	End of follow-up	No chest pain	Other diagnoses
1599	71	End of follow-up	No chest pain	Other diagnoses
1600	71	End of follow-up	No chest pain	Other diagnoses
1601	71	End of follow-up	No chest pain	Other diagnoses
1602	71	End of follow-up	No chest pain	Other diagnoses
1603	71	End of follow-up	No chest pain	Other diagnoses
1604	71	End of follow-up	No chest pain	Other diagnoses
1605	71	End of follow-up	No chest pain	Other diagnoses
1606	71	End of follow-up	No chest pain	Other diagnoses
1607	71	End of follow-up	No chest pain	Other diagnoses
1608	71	End of follow-up	No chest pain	Other diagnoses
1609	71	End of follow-up	No chest pain	Other diagnoses
1610	72	End of follow-up	No chest pain	Other diagnoses
1611	72	End of follow-up	No chest pain	Other diagnoses
1612	72	End of follow-up	No chest pain	Other diagnoses
1613	72	End of follow-up	No chest pain	Other diagnoses
1614	72	End of follow-up	No chest pain	Other diagnoses
1615	72	End of follow-up	No chest pain	Other diagnoses
1616	72	End of follow-up	No chest pain	Other diagnoses
1617	72	End of follow-up	No chest pain	Other diagnoses
1618	72	End of follow-up	No chest pain	Other diagnoses
1619	72	End of follow-up	No chest pain	Other diagnoses
1620	72	End of follow-up	No chest pain	Other diagnoses
1621	72	End of follow-up	No chest pain	Other diagnoses
1622	72	End of follow-up	No chest pain	Other diagnoses
1623	72	End of follow-up	No chest pain	Other diagnoses
1624	72	End of follow-up	No chest pain	Other diagnoses
1625	73	End of follow-up	No chest pain	Other diagnoses
1626	73	End of follow-up	No chest pain	Other diagnoses
1627	73	End of follow-up	No chest pain	Other diagnoses
1628	73	End of follow-up	No chest pain	Other diagnoses
1629	73	End of follow-up	No chest pain	Other diagnoses
1630	73	End of follow-up	No chest pain	Other diagnoses
1631	73	End of follow-up	No chest pain	Other diagnoses
1632	73	End of follow-up	No chest pain	Other diagnoses
1633	74	End of follow-up	No chest pain	Other diagnoses
1634	74	End of follow-up	No chest pain	Other diagnoses
1635	74	End of follow-up	No chest pain	Other diagnoses
1636	74	End of follow-up	No chest pain	Other diagnoses
1637	74	End of follow-up	No chest pain	Other diagnoses
1638	74	End of follow-up	No chest pain	Other diagnoses
1639	74	End of follow-up	No chest pain	Other diagnoses
1640	74	End of follow-up	No chest pain	Other diagnoses
1641	74	End of follow-up	No chest pain	Other diagnoses
1642	74	End of follow-up	No chest pain	Other diagnoses
1643	74	End of follow-up	No chest pain	Other diagnoses
1644	74	End of follow-up	No chest pain	Other diagnoses
1645	74	End of follow-up	No chest pain	Other diagnoses
1646	74	End of follow-up	No chest pain	Other diagnoses
1647	75	End of follow-up	No chest pain	Other diagnoses
1648	75	End of follow-up	No chest pain	Other diagnoses
1649	75	End of follow-up	No chest pain	Other diagnoses
1650	75	End of follow-up	No chest pain	Other diagnoses
1651	75	End of follow-up	No chest pain	Other diagnoses
1652	75	End of follow-up	No chest pain	Other diagnoses
1653	75	End of follow-up	No chest pain	Other diagnoses
1654	75	End of follow-up	No chest pain	Other diagnoses
1655	75	End of follow-up	No chest pain	Other diagnoses
1656	75	End of follow-up	No chest pain	Other diagnoses
1657	76	End of follow-up	No chest pain	Other diagnoses
1658	76	End of follow-up	No chest pain	Other diagnoses
1659	76	End of follow-up	No chest pain	Other diagnoses
1660	76	End of follow-up	No chest pain	Other diagnoses
1661	76	End of follow-up	No chest pain	Other diagnoses
1662	76	End of follow-up	No chest pain	Other diagnoses
1663	76	End of follow-up	No chest pain	Other diagnoses
1664	76	End of follow-up	No chest pain	Other diagnoses
1665	76	End of follow-up	No chest pain	Other diagnoses
1666	76	End of follow-up	No chest pain	Other diagnoses
1667	76	End of follow-up	No chest pain	Other diagnoses
1668	77	End of follow-up	No chest pain	Other diagnoses
1669	77	End of follow-up	No chest pain	Other diagnoses
1670	77	End of follow-up	No chest pain	Other diagnoses
1671	77	End of follow-up	No chest pain	Other diagnoses
1672	77	End of follow-up	No chest pain	Other diagnoses
1673	77	End of follow-up	No chest pain	Other diagnoses
1674	77	End of follow-up	No chest pain	Other diagnoses
1675	77	End of follow-up	No chest pain	Other diagnoses
1676	78	End of follow-up	No chest pain	Other diagnoses
1677	78	End of follow-up	No chest pain	Other diagnoses
1678	78	End of follow-up	No chest pain	Other diagnoses
1679	78	End of follow-up	No chest pain	Other diagnoses
1680	78	End of follow-up	No chest pain	Other diagnoses
1681	78	End of follow-up	No chest pain	Other diagnoses
1682	78	End of follow-up	No chest pain	Other diagnoses
1683	78	End of follow-up	No chest pain	Other diagnoses
1684	78	End of follow-up	No chest pain	Other diagnoses
1685	78	End of follow-up	No chest pain	Other diagnoses
1686	79	End of follow-up	No chest pain	Other diagnoses
1687	79	End of follow-up	No chest pain	Other diagnoses
1688	79	End of follow-up	No chest pain	Other diagnoses
1689	79	End of follow-up	No chest pain	Other diagnoses
1690	79	End of follow-up	No chest pain	Other diagnoses
1691	79	End of follow-up	No chest pain	Other diagnoses
1692	79	End of follow-up	No chest pain	Other diagnoses
1693	79	End of follow-up	No chest pain	Other diagnoses
1694	79	End of follow-up	No chest pain	Other diagnoses
1695	79	End of follow-up	No chest pain	Other diagnoses
1696	79	End of follow-up	No chest pain	Other diagnoses
1697	79	End of follow-up	No chest pain	Other diagnoses
1698	79	End of follow-up	No chest pain	Other diagnoses
1699	79	End of follow-up	No chest pain	Other diagnoses
1700	80	End of follow-up	No chest pain	Other diagnoses
1701	80	End of follow-up	No chest pain	Other diagnoses
1702	80	End of follow-up	No chest pain	Other diagnoses
1703	80	End of follow-up	No chest pain	Other diagnoses
1704	80	End of follow-up	No chest pain	Other diagnoses
1705	80	End of follow-up	No chest pain	Other diagnoses
1706	80	End of follow-up	No chest pain	Other diagnoses
1707	80	End of follow-up	No chest pain	Other diagnoses
1708	80	End of follow-up	No chest pain	Other diagnoses
1709	80	End of follow-up	No chest pain	Other diagnoses
1710	80	End of follow-up	No chest pain	Other diagnoses
1711	80	End of follow-up	No chest pain	Other diagnoses
1712	80	End of follow-up	No chest pain	Other diagnoses
1713	80	End of follow-up	No chest pain	Other diagnoses
1714	81	End of follow-up	No chest pain	Other diagnoses
1715	81	End of follow-up	No chest pain	Other diagnoses
1716	81	End of follow-up	No chest pain	Other diagnoses
1717	81	End of follow-up	No chest pain	Other diagnoses
1718	81	End of follow-up	No chest pain	Other diagnoses
1719	81	End of follow-up	No chest pain	Other diagnoses
1720	81	End of follow-up	No chest pain	Other diagnoses
1721	81	End of follow-up	No chest pain	Other diagnoses
1722	81	End of follow-up	No chest pain	Other diagnoses
1723	81	End of follow-up	No chest pain	Other diagnoses
1724	81	End of follow-up	No chest pain	Other diagnoses
1725	81	End of follow-up	No chest pain	Other diagnoses
1726	82	End of follow-up	No chest pain	Other diagnoses
1727	82	End of follow-up	No chest pain	Other diagnoses
1728	82	End of follow-up	No chest pain	Other diagnoses
1729	82	End of follow-up	No chest pain	Other diagnoses
1730	82	End of follow-up	No chest pain	Other diagnoses
1731	82	End of follow-up	No chest pain	Other diagnoses
1732	82	End of follow-up	No chest pain	Other diagnoses
1733	82	End of follow-up	No chest pain	Other diagnoses
1734	82	End of follow-up	No chest pain	Other diagnoses
1735	82	End of follow-up	No chest pain	Other diagnoses
1736	82	End of follow-up	No chest pain	Other diagnoses
1737	82	End of follow-up	No chest pain	Other diagnoses
1738	82	End of follow-up	No chest pain	Other diagnoses
1739	83	End of follow-up	No chest pain	Other diagnoses
1740	83	End of follow-up	No chest pain	Other diagnoses
1741	83	End of follow-up	No chest pain	Other diagnoses
1742	83	End of follow-up	No chest pain	Other diagnoses
1743	83	End of follow-up	No chest pain	Other diagnoses
1744	83	End of follow-up	No chest pain	Other diagnoses
1745	83	End of follow-up	No chest pain	Other diagnoses
1746	83	End of follow-up	No chest pain	Other diagnoses
1747	83	End of follow-up	No chest pain	Other diagnoses
1748	83	End of follow-up	No chest pain	Other diagnoses
1749	84	End of follow-up	No chest pain	Other diagnoses
1750	84	End of follow-up	No chest pain	Other diagnoses
1751	84	End of follow-up	No chest pain	Other diagnoses
1752	84	End of follow-up	No chest pain	Other diagnoses
1753	84	End of follow-up	No chest pain	Other diagnoses
1754	84	End of follow-up	No chest pain	Other diagnoses
1755	84	End of follow-up	No chest pain	Other diagnoses
1756	84	End of follow-up	No chest pain	Other diagnoses
1757	85	End of follow-up	No chest pain	Other diagnoses
1758	85	End of follow-up	No chest pain	Other diagnoses
1759	85	End of follow-up	No chest pain	Other diagnoses
1760	85	End of follow-up	No chest pain	Other diagnoses
1761	85	End of follow-up	No chest pain	Other diagnoses
1762	85	End of follow-up	No chest pain	Other diagnoses
1763	85	End of follow-up	No chest pain	Other diagnoses
1764	85	End of follow-up	No chest pain	Other diagnoses
1765	85	End of follow-up	No chest pain	Other diagnoses
1766	85	End of follow-up	No chest pain	Other diagnoses
1767	85	End of follow-up	No chest pain	Other diagnoses
1768	85	End of follow-up	No chest pain	Other diagnoses
1769	85	End of follow-up	No chest pain	Other diagnoses
1770	85	End of follow-up	No chest pain	Other diagnoses
1771	85	End of follow-up	No chest pain	Other diagnoses
1772	85	End of follow-up	No chest pain	Other diagnoses
1773	86	End of follow-up	No chest pain	Other diagnoses
1774	86	End of follow-up	No chest pain	Other diagnoses
1775	86	End of follow-up	No chest pain	Other diagnoses
1776	86	End of follow-up	No chest pain	Other diagnoses
1777	86	End of follow-up	No chest pain	Other diagnoses
1778	86	End of follow-up	No chest pain	Other diagnoses
1779	86	End of follow-up	No chest pain	Other diagnoses
1780	86	End of follow-up	No chest pain	Other diagnoses
1781	86	End of follow-up	No chest pain	Other diagnoses
1782	86	End of follow-up	No chest pain	Other diagnoses
1783	86	End of follow-up	No chest pain	Other diagnoses
1784	86	End of follow-up	No chest pain	Other diagnoses
1785	87	End of follow-up	No chest pain	Other diagnoses
1786	87	End of follow-up	No chest pain	Other diagnoses
1787	87	End of follow-up	No chest pain	Other diagnoses
1788	87	End of follow-up	No chest pain	Other diagnoses
1789	87	End of follow-up	No chest pain	Other diagnoses
1790	87	End of follow-up	No chest pain	Other diagnoses
1791	87	End of follow-up	No chest pain	Other diagnoses
1792	87	End of follow-up	No chest pain	Other diagnoses
1793	87	End of follow-up	No chest pain	Other diagnoses
1794	87	End of follow-up	No chest pain	Other diagnoses
1795	87	End of follow-up	No chest pain	Other diagnoses
1796	87	End of follow-up	No chest pain	Other diagnoses
1797	88	End of follow-up	No chest pain	Other diagnoses
1798	88	End of follow-up	No chest pain	Other diagnoses
1799	88	End of follow-up	No chest pain	Other diagnoses
1800	88	End of follow-up	No chest pain	Other diagnoses
1801	88	End of follow-up	No chest pain	Other diagnoses
1802	88	End of follow-up	No chest pain	Other diagnoses
1803	88	End of follow-up	No chest pain	Other diagnoses
1804	88	End of follow-up	No chest pain	Other diagnoses
1805	88	End of follow-up	No chest pain	Other diagnoses
1806	88	End of follow-up	No chest pain	Other diagnoses
1807	88	End of follow-up	No chest pain	Other diagnoses
1808	88	End of follow-up	No chest pain	Other diagnoses
1809	88	End of follow-up	No chest pain	Other diagnoses
1810	88	End of follow-up	No chest pain	Other diagnoses
1811	89	End of follow-up	No chest pain	Other diagnoses
1812	89	End of follow-up	No chest pain	Other diagnoses
1813	89	End of follow-up	No chest pain	Other diagnoses
1814	90	End of follow-up	No chest pain	Other diagnoses
1815	90	End of follow-up	No chest pain	Other diagnoses
1816	90	End of follow-up	No chest pain	Other diagnoses
1817	90	End of follow-up	No chest pain	Other diagnoses
1818	90	End of follow-up	No chest pain	Other diagnoses
1819	90	End of follow-up	No chest pain	Other diagnoses
1820	90	End of follow-up	No chest pain	Other diagnoses
1821	90	End of follow-up	No chest pain	Other diagnoses
1822	90	End of follow-up	No chest pain	Other diagnoses
1823	91	End of follow-up	No chest pain	Other diagnoses
1824	91	End of follow-up	No chest pain	Other diagnoses
1825	91	End of follow-up	No chest pain	Other diagnoses
1826	91	End of follow-up	No chest pain	Other diagnoses
1827	91	End of follow-up	No chest pain	Other diagnoses
1828	91	End of follow-up	No chest pain	Other diagnoses
1829	91	End of follow-up	No chest pain	Other diagnoses
1830	91	End of follow-up	No chest pain	Other diagnoses
1831	91	End of follow-up	No chest pain	Other diagnoses
1832	91	End of follow-up	No chest pain	Other diagnoses
1833	91	End of follow-up	No chest pain	Other diagnoses
1834	91	End of follow-up	No chest pain	Other diagnoses
1835	92	End of follow-up	No chest pain	Other diagnoses
1836	92	End of follow-up	No chest pain	Other diagnoses
1837	92	End of follow-up	No chest pain	Other diagnoses
1838	92	End of follow-up	No chest pain	Other diagnoses
1839	92	End of follow-up	No chest pain	Other diagnoses
1840	92	End of follow-up	No chest pain	Other diagnoses
1841	92	End of follow-up	No chest pain	Other diagnoses
1842	92	End of follow-up	No chest pain	Other diagnoses
1843	92	End of follow-up	No chest pain	Other diagnoses
1844	92	End of follow-up	No chest pain	Other diagnoses
1845	92	End of follow-up	No chest pain	Other diagnoses
1846	92	End of follow-up	No chest pain	Other diagnoses
1847	93	End of follow-up	No chest pain	Other diagnoses
1848	93	End of follow-up	No chest pain	Other diagnoses
1849	93	End of follow-up	No chest pain	Other diagnoses
1850	93	End of follow-up	No chest pain	Other diagnoses
1851	93	End of follow-up	No chest pain	Other diagnoses
1852	93	End of follow-up	No chest pain	Other diagnoses
1853	93	End of follow-up	No chest pain	Other diagnoses
1854	93	End of follow-up	No chest pain	Other diagnoses
1855	93	End of follow-up	No chest pain	Other diagnoses
1856	93	End of follow-up	No chest pain	Other diagnoses
1857	93	End of follow-up	No chest pain	Other diagnoses
1858	94	End of follow-up	No chest pain	Other diagnoses
1859	94	End of follow-up	No chest pain	Other diagnoses
1860	94	End of follow-up	No chest pain	Other diagnoses
1861	94	End of follow-up	No chest pain	Other diagnoses
1862	94	End of follow-up	No chest pain	Other diagnoses
1863	94	End of follow-up	No chest pain	Other diagnoses
1864	94	End of follow-up	No chest pain	Other diagnoses
1865	94	End of follow-up	No chest pain	Other diagnoses
1866	94	End of follow-up	No chest pain	Other diagnoses
1867	94	End of follow-up	No chest pain	Other diagnoses
1868	94	End of follow-up	No chest pain	Other diagnoses
1869	94	End of follow-up	No chest pain	Other diagnoses
1870	94	End of follow-up	No chest pain	Other diagnoses
1871	94	End of follow-up	No chest pain	Other diagnoses
1872	94	End of follow-up	No chest pain	Other diagnoses
1873	95	End of follow-up	No chest pain	Other diagnoses
1874	95	End of follow-up	No chest pain	Other diagnoses
1875	95	End of follow-up	No chest pain	Other diagnoses
1876	95	End of follow-up	No chest pain	Other diagnoses
1877	95	End of follow-up	No chest pain	Other diagnoses
1878	95	End of follow-up	No chest pain	Other diagnoses
1879	95	End of follow-up	No chest pain	Other diagnoses
1880	95	End of follow-up	No chest pain	Other diagnoses
1881	96	End of follow-up	No chest pain	Other diagnoses
1882	96	End of follow-up	No chest pain	Other diagnoses
1883	96	End of follow-up	No chest pain	Other diagnoses
1884	96	End of follow-up	No chest pain	Other diagnoses
1885	96	End of follow-up	No chest pain	Other diagnoses
1886	96	End of follow-up	No chest pain	Other diagnoses
1887	96	End of follow-up	No chest pain	Other diagnoses
1888	96	End of follow-up	No chest pain	Other diagnoses
1889	96	End of follow-up	No chest pain	Other diagnoses
1890	96	End of follow-up	No chest pain	Other diagnoses
1891	97	End of follow-up	No chest pain	Other diagnoses
1892	97	End of follow-up	No chest pain	Other diagnoses
1893	97	End of follow-up	No chest pain	Other diagnoses
1894	97	End of follow-up	No chest pain	Other diagnoses
1895	97	End of follow-up	No chest pain	Other diagnoses
1896	97	End of follow-up	No chest pain	Other diagnoses
1897	97	End of follow-up	No chest pain	Other diagnoses
1898	97	End of follow-up	No chest pain	Other diagnoses
1899	97	End of follow-up	No chest pain	Other diagnoses
1900	97	End of follow-up	No chest pain	Other diagnoses
1901	97	End of follow-up	No chest pain	Other diagnoses
1902	97	End of follow-up	No chest pain	Other diagnoses
1903	97	End of follow-up	No chest pain	Other diagnoses
1904	97	End of follow-up	No chest pain	Other diagnoses
1905	97	End of follow-up	No chest pain	Other diagnoses
1906	97	End of follow-up	No chest pain	Other diagnoses
1907	98	End of follow-up	No chest pain	Other diagnoses
1908	98	End of follow-up	No chest pain	Other diagnoses
1909	98	End of follow-up	No chest pain	Other diagnoses
1910	98	End of follow-up	No chest pain	Other diagnoses
1911	98	End of follow-up	No chest pain	Other diagnoses
1912	98	End of follow-up	No chest pain	Other diagnoses
1913	98	End of follow-up	No chest pain	Other diagnoses
1914	98	End of follow-up	No chest pain	Other diagnoses
1915	98	End of follow-up	No chest pain	Other diagnoses
1916	99	End of follow-up	No chest pain	Other diagnoses
1917	99	End of follow-up	No chest pain	Other diagnoses
1918	99	End of follow-up	No chest pain	Other diagnoses
1919	99	End of follow-up	No chest pain	Other diagnoses
1920	99	End of follow-up	No chest pain	Other diagnoses
1921	99	End of follow-up	No chest pain	Other diagnoses
1922	99	End of follow-up	No chest pain	Other diagnoses
1923	99	End of follow-up	No chest pain	Other diagnoses
1924	99	End of follow-up	No chest pain	Other diagnoses
1925	100	End of follow-up	No chest pain	Other diagnoses
1926	100	End of follow-up	No chest pain	Other diagnoses
1927	100	End of follow-up	No chest pain	Other diagnoses
1928	100	End of follow-up	No chest pain	Other diagnoses
1929	100	End of follow-up	No chest pain	Other diagnoses
1930	100	End of follow-up	No chest pain	Other diagnoses
1931	100	End of follow-up	No chest pain	Other diagnoses
1932	100	End of follow-up	No chest pain	Other diagnoses
1933	100	End of follow-up	No chest pain	Other diagnoses
1934	100	End of follow-up	No chest pain	Other diagnoses
1935	100	End of follow-up	No chest pain	Other diagnoses
1936	100	End of follow-up	No chest pain	Other diagnoses
1937	101	End of follow-up	No chest pain	Other diagnoses
1938	101	End of follow-up	No chest pain	Other diagnoses
1939	101	End of follow-up	No chest pain	Other diagnoses
1940	101	End of follow-up	No chest pain	Other diagnoses
1941	101	End of follow-up	No chest pain	Other diagnoses
1942	101	End of follow-up	No chest pain	Other diagnoses
1943	101	End of follow-up	No chest pain	Other diagnoses
1944	101	End of follow-up	No chest pain	Other diagnoses
1945	101	End of follow-up	No chest pain	Other diagnoses
1946	102	End of follow-up	No chest pain	Other diagnoses
1947	102	End of follow-up	No chest pain	Other diagnoses
1948	102	End of follow-up	No chest pain	Other diagnoses
1949	102	End of follow-up	No chest pain	Other diagnoses
1950	102	End of follow-up	No chest pain	Other diagnoses
1951	102	End of follow-up	No chest pain	Other diagnoses
1952	102	End of follow-up	No chest pain	Other diagnoses
1953	102	End of follow-up	No chest pain	Other diagnoses
1954	103	End of follow-up	No chest pain	Other diagnoses
1955	103	End of follow-up	No chest pain	Other diagnoses
1956	103	End of follow-up	No chest pain	Other diagnoses
1957	103	End of follow-up	No chest pain	Other diagnoses
1958	103	End of follow-up	No chest pain	Other diagnoses
1959	103	End of follow-up	No chest pain	Other diagnoses
1960	103	End of follow-up	No chest pain	Other diagnoses
1961	103	End of follow-up	No chest pain	Other diagnoses
1962	103	End of follow-up	No chest pain	Other diagnoses
1963	103	End of follow-up	No chest pain	Other diagnoses
1964	103	End of follow-up	No chest pain	Other diagnoses
1965	103	End of follow-up	No chest pain	Other diagnoses
1966	103	End of follow-up	No chest pain	Other diagnoses
1967	103	End of follow-up	No chest pain	Other diagnoses
1968	103	End of follow-up	No chest pain	Other diagnoses
1969	103	End of follow-up	No chest pain	Other diagnoses
1970	103	End of follow-up	No chest pain	Other diagnoses
1971	103	End of follow-up	No chest pain	Other diagnoses
1972	104	End of follow-up	No chest pain	Other diagnoses
1973	104	End of follow-up	No chest pain	Other diagnoses
1974	104	End of follow-up	No chest pain	Other diagnoses
1975	104	End of follow-up	No chest pain	Other diagnoses
1976	104	End of follow-up	No chest pain	Other diagnoses
1977	104	End of follow-up	No chest pain	Other diagnoses
1978	104	End of follow-up	No chest pain	Other diagnoses
1979	104	End of follow-up	No chest pain	Other diagnoses
1980	104	End of follow-up	No chest pain	Other diagnoses
1981	104	End of follow-up	No chest pain	Other diagnoses
1982	105	End of follow-up	No chest pain	Other diagnoses
1983	105	End of follow-up	No chest pain	Other diagnoses
1984	105	End of follow-up	No chest pain	Other diagnoses
1985	105	End of follow-up	No chest pain	Other diagnoses
1986	105	End of follow-up	No chest pain	Other diagnoses
1987	105	End of follow-up	No chest pain	Other diagnoses
1988	105	End of follow-up	No chest pain	Other diagnoses
1989	105	End of follow-up	No chest pain	Other diagnoses
1990	106	End of follow-up	No chest pain	Other diagnoses
1991	106	End of follow-up	No chest pain	Other diagnoses
1992	106	End of follow-up	No chest pain	Other diagnoses
1993	106	End of follow-up	No chest pain	Other diagnoses
1994	106	End of follow-up	No chest pain	Other diagnoses
1995	106	End of follow-up	No chest pain	Other diagnoses
1996	106	End of follow-up	No chest pain	Other diagnoses
1997	106	End of follow-up	No chest pain	Other diagnoses
1998	106	End of follow-up	No chest pain	Other diagnoses
1999	106	End of follow-up	No chest pain	Other diagnoses
[truncated: 45,602 more rows]

## Sheet: Symptoms_and_diagnosis
Patient_number	Chest_pain	Diagnosis_category
1	Chest pain	Acute cardiac diagnoses
2	Chest pain	Acute cardiac diagnoses
3	Chest pain	Acute cardiac diagnoses
4	Chest pain	Acute cardiac diagnoses
5	Chest pain	Acute cardiac diagnoses
6	Chest pain	Acute cardiac diagnoses
7	Chest pain	Acute cardiac diagnoses
8	Chest pain	Acute cardiac diagnoses
9	Chest pain	Acute cardiac diagnoses
10	Chest pain	Acute cardiac diagnoses
11	Chest pain	Acute cardiac diagnoses
12	Chest pain	Acute cardiac diagnoses
13	Chest pain	Acute cardiac diagnoses
14	Chest pain	Acute cardiac diagnoses
15	Chest pain	Acute cardiac diagnoses
16	Chest pain	Acute cardiac diagnoses
17	Chest pain	Acute cardiac diagnoses
18	Chest pain	Acute cardiac diagnoses
19	Chest pain	Acute cardiac diagnoses
20	Chest pain	Acute cardiac diagnoses
21	Chest pain	Acute cardiac diagnoses
22	Chest pain	Acute cardiac diagnoses
23	Chest pain	Acute cardiac diagnoses
24	Chest pain	Acute cardiac diagnoses
25	Chest pain	Acute cardiac diagnoses
26	Chest pain	Acute cardiac diagnoses
27	Chest pain	Acute cardiac diagnoses
28	Chest pain	Acute cardiac diagnoses
29	Chest pain	Acute cardiac diagnoses
30	Chest pain	Acute cardiac diagnoses
31	Chest pain	Acute cardiac diagnoses
32	Chest pain	Acute cardiac diagnoses
33	Chest pain	Acute cardiac diagnoses
34	Chest pain	Acute cardiac diagnoses
35	Chest pain	Acute cardiac diagnoses
36	Chest pain	Acute cardiac diagnoses
37	Chest pain	Acute cardiac diagnoses
38	Chest pain	Acute cardiac diagnoses
39	Chest pain	Acute cardiac diagnoses
40	Chest pain	Acute cardiac diagnoses
41	Chest pain	Acute cardiac diagnoses
42	Chest pain	Acute cardiac diagnoses
43	Chest pain	Acute cardiac diagnoses
44	Chest pain	Acute cardiac diagnoses
45	Chest pain	Acute cardiac diagnoses
46	Chest pain	Acute cardiac diagnoses
47	Chest pain	Acute cardiac diagnoses
48	Chest pain	Acute cardiac diagnoses
49	Chest pain	Acute cardiac diagnoses
50	Chest pain	Acute cardiac diagnoses
51	Chest pain	Acute cardiac diagnoses
52	Chest pain	Acute cardiac diagnoses
53	Chest pain	Acute cardiac diagnoses
54	Chest pain	Acute cardiac diagnoses
55	Chest pain	Acute cardiac diagnoses
56	Chest pain	Acute cardiac diagnoses
57	Chest pain	Acute cardiac diagnoses
58	Chest pain	Acute cardiac diagnoses
59	Chest pain	Acute cardiac diagnoses
60	Chest pain	Acute cardiac diagnoses
61	Chest pain	Acute cardiac diagnoses
62	Chest pain	Acute cardiac diagnoses
63	Chest pain	Acute cardiac diagnoses
64	Chest pain	Acute cardiac diagnoses
65	Chest pain	Acute cardiac diagnoses
66	Chest pain	Acute cardiac diagnoses
67	Chest pain	Acute cardiac diagnoses
68	Chest pain	Acute cardiac diagnoses
69	Chest pain	Acute cardiac diagnoses
70	Chest pain	Acute cardiac diagnoses
71	Chest pain	Acute cardiac diagnoses
72	Chest pain	Acute cardiac diagnoses
73	Chest pain	Acute cardiac diagnoses
74	Chest pain	Acute cardiac diagnoses
75	Chest pain	Acute cardiac diagnoses
76	Chest pain	Acute cardiac diagnoses
77	Chest pain	Acute cardiac diagnoses
78	Chest pain	Acute cardiac diagnoses
79	Chest pain	Acute cardiac diagnoses
80	Chest pain	Acute cardiac diagnoses
81	Chest pain	Acute cardiac diagnoses
82	Chest pain	Acute cardiac diagnoses
83	Chest pain	Acute cardiac diagnoses
84	Chest pain	Acute cardiac diagnoses
85	Chest pain	Acute cardiac diagnoses
86	Chest pain	Acute cardiac diagnoses
87	Chest pain	Acute cardiac diagnoses
88	Chest pain	Acute cardiac diagnoses
89	Chest pain	Acute cardiac diagnoses
90	Chest pain	Acute cardiac diagnoses
91	Chest pain	Acute cardiac diagnoses
92	Chest pain	Acute cardiac diagnoses
93	Chest pain	Acute cardiac diagnoses
94	Chest pain	Acute cardiac diagnoses
95	Chest pain	Acute cardiac diagnoses
96	Chest pain	Acute cardiac diagnoses
97	Chest pain	Acute cardiac diagnoses
98	Chest pain	Acute cardiac diagnoses
99	Chest pain	Acute cardiac diagnoses
100	Chest pain	Acute cardiac diagnoses
101	Chest pain	Acute cardiac diagnoses
102	Chest pain	Acute cardiac diagnoses
103	Chest pain	Acute cardiac diagnoses
104	Chest pain	Acute cardiac diagnoses
105	Chest pain	Acute cardiac diagnoses
106	Chest pain	Acute cardiac diagnoses
107	Chest pain	Acute cardiac diagnoses
108	Chest pain	Acute cardiac diagnoses
109	Chest pain	Acute cardiac diagnoses
110	Chest pain	Acute cardiac diagnoses
111	Chest pain	Acute cardiac diagnoses
112	Chest pain	Acute cardiac diagnoses
113	Chest pain	Acute cardiac diagnoses
114	Chest pain	Acute cardiac diagnoses
115	Chest pain	Acute cardiac diagnoses
116	Chest pain	Acute cardiac diagnoses
117	Chest pain	Acute cardiac diagnoses
118	Chest pain	Acute cardiac diagnoses
119	Chest pain	Acute cardiac diagnoses
120	Chest pain	Acute cardiac diagnoses
121	Chest pain	Acute cardiac diagnoses
122	Chest pain	Acute cardiac diagnoses
123	Chest pain	Acute cardiac diagnoses
124	Chest pain	Acute cardiac diagnoses
125	Chest pain	Acute cardiac diagnoses
126	Chest pain	Acute cardiac diagnoses
127	Chest pain	Acute cardiac diagnoses
128	Chest pain	Acute cardiac diagnoses
129	Chest pain	Acute cardiac diagnoses
130	Chest pain	Acute cardiac diagnoses
131	Chest pain	Acute cardiac diagnoses
132	Chest pain	Acute cardiac diagnoses
133	Chest pain	Acute cardiac diagnoses
134	Chest pain	Acute cardiac diagnoses
135	Chest pain	Acute cardiac diagnoses
136	Chest pain	Acute cardiac diagnoses
137	Chest pain	Acute cardiac diagnoses
138	Chest pain	Acute cardiac diagnoses
139	Chest pain	Acute cardiac diagnoses
140	Chest pain	Acute cardiac diagnoses
141	Chest pain	Acute cardiac diagnoses
142	Chest pain	Acute cardiac diagnoses
143	Chest pain	Acute cardiac diagnoses
144	Chest pain	Acute cardiac diagnoses
145	Chest pain	Acute cardiac diagnoses
146	Chest pain	Acute cardiac diagnoses
147	Chest pain	Acute cardiac diagnoses
148	Chest pain	Acute cardiac diagnoses
149	Chest pain	Acute cardiac diagnoses
150	Chest pain	Acute cardiac diagnoses
151	Chest pain	Acute cardiac diagnoses
152	Chest pain	Acute cardiac diagnoses
153	Chest pain	Acute cardiac diagnoses
154	Chest pain	Acute cardiac diagnoses
155	Chest pain	Acute cardiac diagnoses
156	Chest pain	Acute cardiac diagnoses
157	Chest pain	Acute cardiac diagnoses
158	Chest pain	Acute cardiac diagnoses
159	Chest pain	Acute cardiac diagnoses
160	Chest pain	Acute cardiac diagnoses
161	Chest pain	Acute cardiac diagnoses
162	Chest pain	Acute cardiac diagnoses
163	Chest pain	Acute cardiac diagnoses
164	Chest pain	Acute cardiac diagnoses
165	Chest pain	Acute cardiac diagnoses
166	Chest pain	Acute cardiac diagnoses
167	Chest pain	Acute cardiac diagnoses
168	Chest pain	Acute cardiac diagnoses
169	Chest pain	Acute cardiac diagnoses
170	Chest pain	Acute cardiac diagnoses
171	Chest pain	Acute cardiac diagnoses
172	Chest pain	Acute cardiac diagnoses
173	Chest pain	Acute cardiac diagnoses
174	Chest pain	Acute cardiac diagnoses
175	Chest pain	Acute cardiac diagnoses
176	Chest pain	Acute cardiac diagnoses
177	Chest pain	Acute cardiac diagnoses
178	Chest pain	Acute cardiac diagnoses
179	Chest pain	Acute cardiac diagnoses
180	Chest pain	Acute cardiac diagnoses
181	Chest pain	Acute cardiac diagnoses
182	Chest pain	Acute cardiac diagnoses
183	Chest pain	Acute cardiac diagnoses
184	Chest pain	Acute cardiac diagnoses
185	Chest pain	Acute cardiac diagnoses
186	Chest pain	Acute cardiac diagnoses
187	Chest pain	Acute cardiac diagnoses
188	Chest pain	Acute cardiac diagnoses
189	Chest pain	Acute cardiac diagnoses
190	Chest pain	Acute cardiac diagnoses
191	Chest pain	Acute cardiac diagnoses
192	Chest pain	Acute cardiac diagnoses
193	Chest pain	Acute cardiac diagnoses
194	Chest pain	Acute cardiac diagnoses
195	Chest pain	Acute cardiac diagnoses
196	Chest pain	Acute cardiac diagnoses
197	Chest pain	Acute cardiac diagnoses
198	Chest pain	Acute cardiac diagnoses
199	Chest pain	Acute cardiac diagnoses
200	Chest pain	Acute cardiac diagnoses
201	Chest pain	Acute cardiac diagnoses
202	Chest pain	Acute cardiac diagnoses
203	Chest pain	Acute cardiac diagnoses
204	Chest pain	Acute cardiac diagnoses
205	Chest pain	Acute cardiac diagnoses
206	Chest pain	Acute cardiac diagnoses
207	Chest pain	Acute cardiac diagnoses
208	Chest pain	Acute cardiac diagnoses
209	Chest pain	Acute cardiac diagnoses
210	Chest pain	Acute cardiac diagnoses
211	Chest pain	Acute cardiac diagnoses
212	Chest pain	Acute cardiac diagnoses
213	Chest pain	Acute cardiac diagnoses
214	Chest pain	Acute cardiac diagnoses
215	Chest pain	Acute cardiac diagnoses
216	Chest pain	Acute cardiac diagnoses
217	Chest pain	Acute cardiac diagnoses
218	Chest pain	Acute cardiac diagnoses
219	Chest pain	Acute cardiac diagnoses
220	Chest pain	Acute cardiac diagnoses
221	Chest pain	Acute cardiac diagnoses
222	Chest pain	Acute cardiac diagnoses
223	Chest pain	Acute cardiac diagnoses
224	Chest pain	Acute cardiac diagnoses
225	Chest pain	Acute cardiac diagnoses
226	Chest pain	Acute cardiac diagnoses
227	Chest pain	Acute cardiac diagnoses
228	Chest pain	Acute cardiac diagnoses
229	Chest pain	Acute cardiac diagnoses
230	Chest pain	Acute cardiac diagnoses
231	Chest pain	Acute cardiac diagnoses
232	Chest pain	Acute cardiac diagnoses
233	Chest pain	Acute cardiac diagnoses
234	Chest pain	Acute cardiac diagnoses
235	Chest pain	Acute cardiac diagnoses
236	Chest pain	Acute cardiac diagnoses
237	Chest pain	Acute cardiac diagnoses
238	Chest pain	Acute cardiac diagnoses
239	Chest pain	Acute cardiac diagnoses
240	Chest pain	Acute cardiac diagnoses
241	Chest pain	Acute cardiac diagnoses
242	Chest pain	Acute cardiac diagnoses
243	Chest pain	Acute cardiac diagnoses
244	Chest pain	Acute cardiac diagnoses
245	Chest pain	Acute cardiac diagnoses
246	Chest pain	Acute cardiac diagnoses
247	Chest pain	Acute cardiac diagnoses
248	Chest pain	Acute cardiac diagnoses
249	Chest pain	Acute cardiac diagnoses
250	Chest pain	Acute cardiac diagnoses
251	Chest pain	Acute cardiac diagnoses
252	Chest pain	Acute cardiac diagnoses
253	Chest pain	Acute cardiac diagnoses
254	Chest pain	Acute cardiac diagnoses
255	Chest pain	Acute cardiac diagnoses
256	Chest pain	Acute cardiac diagnoses
257	Chest pain	Acute cardiac diagnoses
258	Chest pain	Acute cardiac diagnoses
259	Chest pain	Acute cardiac diagnoses
260	Chest pain	Acute cardiac diagnoses
261	Chest pain	Acute cardiac diagnoses
262	Chest pain	Acute cardiac diagnoses
263	Chest pain	Acute cardiac diagnoses
264	Chest pain	Acute cardiac diagnoses
265	Chest pain	Acute cardiac diagnoses
266	Chest pain	Acute cardiac diagnoses
267	Chest pain	Acute cardiac diagnoses
268	Chest pain	Acute cardiac diagnoses
269	Chest pain	Acute cardiac diagnoses
270	Chest pain	Acute cardiac diagnoses
271	Chest pain	Acute cardiac diagnoses
272	Chest pain	Acute cardiac diagnoses
273	Chest pain	Acute cardiac diagnoses
274	Chest pain	Acute cardiac diagnoses
275	Chest pain	Acute cardiac diagnoses
276	Chest pain	Acute cardiac diagnoses
277	Chest pain	Acute cardiac diagnoses
278	Chest pain	Acute cardiac diagnoses
279	Chest pain	Acute cardiac diagnoses
280	Chest pain	Acute cardiac diagnoses
281	Chest pain	Acute cardiac diagnoses
282	Chest pain	Acute cardiac diagnoses
283	Chest pain	Acute cardiac diagnoses
284	Chest pain	Acute cardiac diagnoses
285	Chest pain	Acute cardiac diagnoses
286	Chest pain	Acute cardiac diagnoses
287	Chest pain	Acute cardiac diagnoses
288	Chest pain	Acute cardiac diagnoses
289	Chest pain	Acute cardiac diagnoses
290	Chest pain	Acute cardiac diagnoses
291	Chest pain	Acute cardiac diagnoses
292	Chest pain	Acute cardiac diagnoses
293	Chest pain	Acute cardiac diagnoses
294	Chest pain	Acute cardiac diagnoses
295	Chest pain	Acute cardiac diagnoses
296	Chest pain	Acute cardiac diagnoses
297	Chest pain	Acute cardiac diagnoses
298	Chest pain	Acute cardiac diagnoses
299	Chest pain	Acute cardiac diagnoses
300	Chest pain	Acute cardiac diagnoses
301	Chest pain	Acute cardiac diagnoses
302	Chest pain	Acute cardiac diagnoses
303	Chest pain	Acute cardiac diagnoses
304	Chest pain	Acute cardiac diagnoses
305	Chest pain	Acute cardiac diagnoses
306	Chest pain	Acute cardiac diagnoses
307	Chest pain	Acute cardiac diagnoses
308	Chest pain	Acute cardiac diagnoses
309	Chest pain	Acute cardiac diagnoses
310	Chest pain	Acute cardiac diagnoses
311	Chest pain	Acute cardiac diagnoses
312	Chest pain	Acute cardiac diagnoses
313	Chest pain	Acute cardiac diagnoses
314	Chest pain	Acute cardiac diagnoses
315	Chest pain	Acute cardiac diagnoses
316	Chest pain	Acute cardiac diagnoses
317	Chest pain	Acute cardiac diagnoses
318	Chest pain	Acute cardiac diagnoses
319	Chest pain	Acute cardiac diagnoses
320	Chest pain	Acute cardiac diagnoses
321	Chest pain	Acute cardiac diagnoses
322	Chest pain	Acute cardiac diagnoses
323	Chest pain	Acute cardiac diagnoses
324	Chest pain	Acute cardiac diagnoses
325	Chest pain	Acute cardiac diagnoses
326	Chest pain	Acute cardiac diagnoses
327	Chest pain	Acute cardiac diagnoses
328	Chest pain	Acute cardiac diagnoses
329	Chest pain	Acute cardiac diagnoses
330	Chest pain	Acute cardiac diagnoses
331	Chest pain	Acute cardiac diagnoses
332	Chest pain	Acute cardiac diagnoses
333	Chest pain	Acute cardiac diagnoses
334	Chest pain	Acute cardiac diagnoses
335	Chest pain	Acute cardiac diagnoses
336	Chest pain	Acute cardiac diagnoses
337	Chest pain	Acute cardiac diagnoses
338	Chest pain	Acute cardiac diagnoses
339	Chest pain	Acute cardiac diagnoses
340	Chest pain	Acute cardiac diagnoses
341	Chest pain	Acute cardiac diagnoses
342	Chest pain	Acute cardiac diagnoses
343	Chest pain	Acute cardiac diagnoses
344	Chest pain	Acute cardiac diagnoses
345	Chest pain	Acute cardiac diagnoses
346	Chest pain	Acute cardiac diagnoses
347	Chest pain	Acute cardiac diagnoses
348	Chest pain	Acute cardiac diagnoses
349	Chest pain	Acute cardiac diagnoses
350	Chest pain	Acute cardiac diagnoses
351	Chest pain	Acute cardiac diagnoses
352	Chest pain	Acute cardiac diagnoses
353	Chest pain	Acute cardiac diagnoses
354	Chest pain	Acute cardiac diagnoses
355	Chest pain	Acute cardiac diagnoses
356	Chest pain	Acute cardiac diagnoses
357	Chest pain	Acute cardiac diagnoses
358	Chest pain	Acute cardiac diagnoses
359	Chest pain	Acute cardiac diagnoses
360	Chest pain	Acute cardiac diagnoses
361	Chest pain	Acute cardiac diagnoses
362	Chest pain	Acute cardiac diagnoses
363	Chest pain	Acute cardiac diagnoses
364	Chest pain	Acute cardiac diagnoses
365	Chest pain	Acute cardiac diagnoses
366	Chest pain	Acute cardiac diagnoses
367	Chest pain	Acute cardiac diagnoses
368	Chest pain	Acute cardiac diagnoses
369	Chest pain	Acute cardiac diagnoses
370	Chest pain	Acute cardiac diagnoses
371	Chest pain	Acute cardiac diagnoses
372	Chest pain	Acute cardiac diagnoses
373	Chest pain	Acute cardiac diagnoses
374	Chest pain	Acute cardiac diagnoses
375	Chest pain	Acute cardiac diagnoses
376	Chest pain	Acute cardiac diagnoses
377	Chest pain	Acute cardiac diagnoses
378	Chest pain	Acute cardiac diagnoses
379	Chest pain	Acute cardiac diagnoses
380	Chest pain	Acute cardiac diagnoses
381	Chest pain	Acute cardiac diagnoses
382	Chest pain	Acute cardiac diagnoses
383	Chest pain	Acute cardiac diagnoses
384	Chest pain	Acute cardiac diagnoses
385	Chest pain	Acute cardiac diagnoses
386	Chest pain	Acute cardiac diagnoses
387	Chest pain	Acute cardiac diagnoses
388	Chest pain	Acute cardiac diagnoses
389	Chest pain	Acute cardiac diagnoses
390	Chest pain	Acute cardiac diagnoses
391	Chest pain	Acute cardiac diagnoses
392	Chest pain	Acute cardiac diagnoses
393	Chest pain	Acute cardiac diagnoses
394	Chest pain	Acute cardiac diagnoses
395	Chest pain	Acute cardiac diagnoses
396	Chest pain	Acute cardiac diagnoses
397	Chest pain	Acute cardiac diagnoses
398	Chest pain	Acute cardiac diagnoses
399	Chest pain	Acute cardiac diagnoses
400	Chest pain	Acute cardiac diagnoses
401	Chest pain	Acute cardiac diagnoses
402	Chest pain	Acute cardiac diagnoses
403	Chest pain	Acute cardiac diagnoses
404	Chest pain	Acute cardiac diagnoses
405	Chest pain	Acute cardiac diagnoses
406	Chest pain	Acute cardiac diagnoses
407	Chest pain	Acute cardiac diagnoses
408	Chest pain	Acute cardiac diagnoses
409	Chest pain	Acute cardiac diagnoses
410	Chest pain	Acute cardiac diagnoses
411	Chest pain	Acute cardiac diagnoses
412	Chest pain	Acute cardiac diagnoses
413	Chest pain	Acute cardiac diagnoses
414	Chest pain	Acute cardiac diagnoses
415	Chest pain	Acute cardiac diagnoses
416	Chest pain	Acute cardiac diagnoses
417	Chest pain	Acute cardiac diagnoses
418	Chest pain	Acute cardiac diagnoses
419	Chest pain	Acute cardiac diagnoses
420	Chest pain	Acute cardiac diagnoses
421	Chest pain	Acute cardiac diagnoses
422	Chest pain	Acute cardiac diagnoses
423	Chest pain	Acute cardiac diagnoses
424	Chest pain	Acute cardiac diagnoses
425	Chest pain	Acute cardiac diagnoses
426	Chest pain	Acute cardiac diagnoses
427	Chest pain	Acute cardiac diagnoses
428	Chest pain	Acute cardiac diagnoses
429	Chest pain	Acute cardiac diagnoses
430	Chest pain	Acute cardiac diagnoses
431	Chest pain	Acute cardiac diagnoses
432	Chest pain	Acute cardiac diagnoses
433	Chest pain	Acute cardiac diagnoses
434	Chest pain	Acute cardiac diagnoses
435	Chest pain	Acute cardiac diagnoses
436	Chest pain	Acute cardiac diagnoses
437	Chest pain	Acute cardiac diagnoses
438	Chest pain	Acute cardiac diagnoses
439	Chest pain	Acute cardiac diagnoses
440	Chest pain	Acute cardiac diagnoses
441	Chest pain	Acute cardiac diagnoses
442	Chest pain	Acute cardiac diagnoses
443	Chest pain	Acute cardiac diagnoses
444	Chest pain	Acute cardiac diagnoses
445	Chest pain	Acute cardiac diagnoses
446	Chest pain	Acute cardiac diagnoses
447	Chest pain	Acute cardiac diagnoses
448	Chest pain	Acute cardiac diagnoses
449	Chest pain	Acute cardiac diagnoses
450	Chest pain	Acute cardiac diagnoses
451	Chest pain	Acute cardiac diagnoses
452	Chest pain	Acute cardiac diagnoses
453	Chest pain	Acute cardiac diagnoses
454	Chest pain	Acute cardiac diagnoses
455	Chest pain	Acute cardiac diagnoses
456	Chest pain	Acute cardiac diagnoses
457	Chest pain	Acute cardiac diagnoses
458	Chest pain	Acute cardiac diagnoses
459	Chest pain	Acute cardiac diagnoses
460	Chest pain	Acute cardiac diagnoses
461	Chest pain	Acute cardiac diagnoses
462	Chest pain	Acute cardiac diagnoses
463	Chest pain	Acute cardiac diagnoses
464	Chest pain	Acute cardiac diagnoses
465	Chest pain	Acute cardiac diagnoses
466	Chest pain	Acute cardiac diagnoses
467	Chest pain	Acute cardiac diagnoses
468	Chest pain	Acute cardiac diagnoses
469	Chest pain	Acute cardiac diagnoses
470	Chest pain	Acute cardiac diagnoses
471	Chest pain	Acute cardiac diagnoses
472	Chest pain	Acute cardiac diagnoses
473	Chest pain	Acute cardiac diagnoses
474	Chest pain	Acute cardiac diagnoses
475	Chest pain	Acute cardiac diagnoses
476	Chest pain	Acute cardiac diagnoses
477	Chest pain	Acute cardiac diagnoses
478	Chest pain	Acute cardiac diagnoses
479	Chest pain	Acute cardiac diagnoses
480	Chest pain	Acute cardiac diagnoses
481	Chest pain	Acute cardiac diagnoses
482	Chest pain	Acute cardiac diagnoses
483	Chest pain	Acute cardiac diagnoses
484	Chest pain	Acute cardiac diagnoses
485	Chest pain	Acute cardiac diagnoses
486	Chest pain	Acute cardiac diagnoses
487	Chest pain	Acute cardiac diagnoses
488	Chest pain	Acute cardiac diagnoses
489	Chest pain	Acute cardiac diagnoses
490	Chest pain	Acute cardiac diagnoses
491	Chest pain	Acute cardiac diagnoses
492	Chest pain	Acute cardiac diagnoses
493	Chest pain	Acute cardiac diagnoses
494	Chest pain	Acute cardiac diagnoses
495	Chest pain	Acute cardiac diagnoses
496	Chest pain	Acute cardiac diagnoses
497	Chest pain	Acute cardiac diagnoses
498	Chest pain	Acute cardiac diagnoses
499	Chest pain	Acute cardiac diagnoses
500	Chest pain	Acute cardiac diagnoses
501	Chest pain	Acute cardiac diagnoses
502	Chest pain	Acute cardiac diagnoses
503	Chest pain	Acute cardiac diagnoses
504	Chest pain	Acute cardiac diagnoses
505	Chest pain	Acute cardiac diagnoses
506	Chest pain	Acute cardiac diagnoses
507	Chest pain	Acute cardiac diagnoses
508	Chest pain	Acute cardiac diagnoses
509	Chest pain	Acute cardiac diagnoses
510	Chest pain	Acute cardiac diagnoses
511	Chest pain	Acute cardiac diagnoses
512	Chest pain	Acute cardiac diagnoses
513	Chest pain	Acute cardiac diagnoses
514	Chest pain	Acute cardiac diagnoses
515	Chest pain	Acute cardiac diagnoses
516	Chest pain	Acute cardiac diagnoses
517	Chest pain	Acute cardiac diagnoses
518	Chest pain	Acute cardiac diagnoses
519	Chest pain	Acute cardiac diagnoses
520	Chest pain	Acute cardiac diagnoses
521	Chest pain	Acute cardiac diagnoses
522	Chest pain	Acute cardiac diagnoses
523	Chest pain	Acute cardiac diagnoses
524	Chest pain	Acute cardiac diagnoses
525	Chest pain	Acute cardiac diagnoses
526	Chest pain	Acute cardiac diagnoses
527	Chest pain	Acute cardiac diagnoses
528	Chest pain	Acute cardiac diagnoses
529	Chest pain	Acute cardiac diagnoses
530	Chest pain	Acute cardiac diagnoses
531	Chest pain	Acute cardiac diagnoses
532	Chest pain	Acute cardiac diagnoses
533	Chest pain	Acute cardiac diagnoses
534	Chest pain	Acute cardiac diagnoses
535	Chest pain	Acute cardiac diagnoses
536	Chest pain	Acute cardiac diagnoses
537	Chest pain	Acute cardiac diagnoses
538	Chest pain	Acute cardiac diagnoses
539	Chest pain	Acute cardiac diagnoses
540	Chest pain	Acute cardiac diagnoses
541	Chest pain	Acute cardiac diagnoses
542	Chest pain	Acute cardiac diagnoses
543	Chest pain	Acute cardiac diagnoses
544	Chest pain	Acute cardiac diagnoses
545	Chest pain	Acute cardiac diagnoses
546	Chest pain	Acute cardiac diagnoses
547	Chest pain	Acute cardiac diagnoses
548	Chest pain	Acute cardiac diagnoses
549	Chest pain	Acute cardiac diagnoses
550	Chest pain	Acute cardiac diagnoses
551	Chest pain	Acute cardiac diagnoses
552	Chest pain	Acute cardiac diagnoses
553	Chest pain	Acute cardiac diagnoses
554	Chest pain	Acute cardiac diagnoses
555	Chest pain	Acute cardiac diagnoses
556	Chest pain	Acute cardiac diagnoses
557	Chest pain	Acute cardiac diagnoses
558	Chest pain	Acute cardiac diagnoses
559	Chest pain	Acute cardiac diagnoses
560	Chest pain	Acute cardiac diagnoses
561	Chest pain	Acute cardiac diagnoses
562	Chest pain	Acute cardiac diagnoses
563	Chest pain	Acute cardiac diagnoses
564	Chest pain	Acute cardiac diagnoses
565	Chest pain	Acute cardiac diagnoses
566	Chest pain	Acute cardiac diagnoses
567	Chest pain	Acute cardiac diagnoses
568	Chest pain	Acute cardiac diagnoses
569	Chest pain	Acute cardiac diagnoses
570	Chest pain	Acute cardiac diagnoses
571	Chest pain	Acute cardiac diagnoses
572	Chest pain	Acute cardiac diagnoses
573	Chest pain	Acute cardiac diagnoses
574	Chest pain	Acute cardiac diagnoses
575	Chest pain	Acute cardiac diagnoses
576	Chest pain	Acute cardiac diagnoses
577	Chest pain	Acute cardiac diagnoses
578	Chest pain	Acute cardiac diagnoses
579	Chest pain	Acute cardiac diagnoses
580	Chest pain	Acute cardiac diagnoses
581	Chest pain	Acute cardiac diagnoses
582	Chest pain	Acute cardiac diagnoses
583	Chest pain	Acute cardiac diagnoses
584	Chest pain	Acute cardiac diagnoses
585	Chest pain	Acute cardiac diagnoses
586	Chest pain	Acute cardiac diagnoses
587	Chest pain	Acute cardiac diagnoses
588	Chest pain	Acute cardiac diagnoses
589	Chest pain	Acute cardiac diagnoses
590	Chest pain	Acute cardiac diagnoses
591	Chest pain	Acute cardiac diagnoses
592	Chest pain	Acute cardiac diagnoses
593	Chest pain	Acute cardiac diagnoses
594	Chest pain	Acute cardiac diagnoses
595	Chest pain	Acute cardiac diagnoses
596	Chest pain	Acute cardiac diagnoses
597	Chest pain	Acute cardiac diagnoses
598	Chest pain	Acute cardiac diagnoses
599	Chest pain	Acute cardiac diagnoses
600	Chest pain	Acute cardiac diagnoses
601	Chest pain	Acute cardiac diagnoses
602	Chest pain	Acute cardiac diagnoses
603	Chest pain	Acute cardiac diagnoses
604	Chest pain	Acute cardiac diagnoses
605	Chest pain	Acute cardiac diagnoses
606	Chest pain	Acute cardiac diagnoses
607	Chest pain	Acute cardiac diagnoses
608	Chest pain	Acute cardiac diagnoses
609	Chest pain	Acute cardiac diagnoses
610	Chest pain	Acute cardiac diagnoses
611	Chest pain	Acute cardiac diagnoses
612	Chest pain	Acute cardiac diagnoses
613	Chest pain	Acute cardiac diagnoses
614	Chest pain	Acute cardiac diagnoses
615	Chest pain	Acute cardiac diagnoses
616	Chest pain	Acute cardiac diagnoses
617	Chest pain	Acute cardiac diagnoses
618	Chest pain	Acute cardiac diagnoses
619	Chest pain	Acute cardiac diagnoses
620	Chest pain	Acute cardiac diagnoses
621	Chest pain	Acute cardiac diagnoses
622	Chest pain	Acute cardiac diagnoses
623	Chest pain	Acute cardiac diagnoses
624	Chest pain	Acute cardiac diagnoses
625	Chest pain	Acute cardiac diagnoses
626	Chest pain	Acute cardiac diagnoses
627	Chest pain	Acute cardiac diagnoses
628	Chest pain	Acute cardiac diagnoses
629	Chest pain	Acute cardiac diagnoses
630	Chest pain	Acute cardiac diagnoses
631	Chest pain	Acute cardiac diagnoses
632	Chest pain	Acute cardiac diagnoses
633	Chest pain	Acute cardiac diagnoses
634	Chest pain	Acute cardiac diagnoses
635	Chest pain	Acute cardiac diagnoses
636	Chest pain	Acute cardiac diagnoses
637	Chest pain	Acute cardiac diagnoses
638	Chest pain	Acute cardiac diagnoses
639	Chest pain	Acute cardiac diagnoses
640	Chest pain	Acute cardiac diagnoses
641	Chest pain	Acute cardiac diagnoses
642	Chest pain	Acute cardiac diagnoses
643	Chest pain	Acute cardiac diagnoses
644	Chest pain	Acute cardiac diagnoses
645	Chest pain	Acute cardiac diagnoses
646	Chest pain	Acute cardiac diagnoses
647	Chest pain	Acute cardiac diagnoses
648	Chest pain	Acute cardiac diagnoses
649	Chest pain	Acute cardiac diagnoses
650	Chest pain	Acute cardiac diagnoses
651	Chest pain	Acute cardiac diagnoses
652	Chest pain	Acute cardiac diagnoses
653	Chest pain	Acute cardiac diagnoses
654	Chest pain	Acute cardiac diagnoses
655	Chest pain	Acute cardiac diagnoses
656	Chest pain	Acute cardiac diagnoses
657	Chest pain	Acute cardiac diagnoses
658	Chest pain	Acute cardiac diagnoses
659	Chest pain	Acute cardiac diagnoses
660	Chest pain	Acute cardiac diagnoses
661	Chest pain	Acute cardiac diagnoses
662	Chest pain	Acute cardiac diagnoses
663	Chest pain	Acute cardiac diagnoses
664	Chest pain	Acute cardiac diagnoses
665	Chest pain	Acute cardiac diagnoses
666	Chest pain	Acute cardiac diagnoses
667	Chest pain	Acute cardiac diagnoses
668	Chest pain	Acute cardiac diagnoses
669	Chest pain	Acute cardiac diagnoses
670	Chest pain	Acute cardiac diagnoses
671	Chest pain	Acute cardiac diagnoses
672	Chest pain	Acute cardiac diagnoses
673	Chest pain	Acute cardiac diagnoses
674	Chest pain	Acute cardiac diagnoses
675	Chest pain	Acute cardiac diagnoses
676	Chest pain	Acute cardiac diagnoses
677	Chest pain	Acute cardiac diagnoses
678	Chest pain	Acute cardiac diagnoses
679	Chest pain	Acute cardiac diagnoses
680	Chest pain	Acute cardiac diagnoses
681	Chest pain	Acute cardiac diagnoses
682	Chest pain	Acute cardiac diagnoses
683	Chest pain	Acute cardiac diagnoses
684	Chest pain	Acute cardiac diagnoses
685	Chest pain	Acute cardiac diagnoses
686	Chest pain	Acute cardiac diagnoses
687	Chest pain	Acute cardiac diagnoses
688	Chest pain	Acute cardiac diagnoses
689	Chest pain	Acute cardiac diagnoses
690	Chest pain	Acute cardiac diagnoses
691	Chest pain	Acute cardiac diagnoses
692	Chest pain	Acute cardiac diagnoses
693	Chest pain	Acute cardiac diagnoses
694	Chest pain	Acute cardiac diagnoses
695	Chest pain	Acute cardiac diagnoses
696	Chest pain	Acute cardiac diagnoses
697	Chest pain	Acute cardiac diagnoses
698	Chest pain	Acute cardiac diagnoses
699	Chest pain	Acute cardiac diagnoses
700	Chest pain	Acute cardiac diagnoses
701	Chest pain	Acute cardiac diagnoses
702	Chest pain	Acute cardiac diagnoses
703	Chest pain	Acute cardiac diagnoses
704	Chest pain	Acute cardiac diagnoses
705	Chest pain	Acute cardiac diagnoses
706	Chest pain	Acute cardiac diagnoses
707	Chest pain	Acute cardiac diagnoses
708	Chest pain	Acute cardiac diagnoses
709	Chest pain	Acute cardiac diagnoses
710	Chest pain	Acute cardiac diagnoses
711	Chest pain	Acute cardiac diagnoses
712	Chest pain	Acute cardiac diagnoses
713	Chest pain	Acute cardiac diagnoses
714	Chest pain	Acute cardiac diagnoses
715	Chest pain	Acute cardiac diagnoses
716	Chest pain	Acute cardiac diagnoses
717	Chest pain	Acute cardiac diagnoses
718	Chest pain	Acute cardiac diagnoses
719	Chest pain	Acute cardiac diagnoses
720	Chest pain	Acute cardiac diagnoses
721	Chest pain	Acute cardiac diagnoses
722	Chest pain	Acute cardiac diagnoses
723	Chest pain	Acute cardiac diagnoses
724	Chest pain	Acute cardiac diagnoses
725	Chest pain	Acute cardiac diagnoses
726	Chest pain	Acute cardiac diagnoses
727	Chest pain	Acute cardiac diagnoses
728	Chest pain	Acute cardiac diagnoses
729	Chest pain	Acute cardiac diagnoses
730	Chest pain	Acute cardiac diagnoses
731	Chest pain	Acute cardiac diagnoses
732	Chest pain	Acute cardiac diagnoses
733	Chest pain	Acute cardiac diagnoses
734	Chest pain	Acute cardiac diagnoses
735	Chest pain	Acute cardiac diagnoses
736	Chest pain	Acute cardiac diagnoses
737	Chest pain	Acute cardiac diagnoses
738	Chest pain	Acute cardiac diagnoses
739	Chest pain	Acute cardiac diagnoses
740	Chest pain	Acute cardiac diagnoses
741	Chest pain	Acute cardiac diagnoses
742	Chest pain	Acute cardiac diagnoses
743	Chest pain	Acute cardiac diagnoses
744	Chest pain	Acute cardiac diagnoses
745	Chest pain	Acute cardiac diagnoses
746	Chest pain	Acute cardiac diagnoses
747	Chest pain	Acute cardiac diagnoses
748	Chest pain	Acute cardiac diagnoses
749	Chest pain	Acute cardiac diagnoses
750	Chest pain	Acute cardiac diagnoses
751	Chest pain	Acute cardiac diagnoses
752	Chest pain	Acute cardiac diagnoses
753	Chest pain	Acute cardiac diagnoses
754	Chest pain	Acute cardiac diagnoses
755	Chest pain	Acute cardiac diagnoses
756	Chest pain	Acute cardiac diagnoses
757	Chest pain	Acute cardiac diagnoses
758	Chest pain	Acute cardiac diagnoses
759	Chest pain	Acute cardiac diagnoses
760	Chest pain	Acute cardiac diagnoses
761	Chest pain	Acute cardiac diagnoses
762	Chest pain	Acute cardiac diagnoses
763	Chest pain	Acute cardiac diagnoses
764	Chest pain	Acute cardiac diagnoses
765	Chest pain	Acute cardiac diagnoses
766	Chest pain	Acute cardiac diagnoses
767	Chest pain	Acute cardiac diagnoses
768	Chest pain	Acute cardiac diagnoses
769	Chest pain	Acute cardiac diagnoses
770	Chest pain	Acute cardiac diagnoses
771	Chest pain	Acute cardiac diagnoses
772	Chest pain	Acute cardiac diagnoses
773	Chest pain	Acute cardiac diagnoses
774	Chest pain	Acute cardiac diagnoses
775	Chest pain	Acute cardiac diagnoses
776	Chest pain	Acute cardiac diagnoses
777	Chest pain	Acute cardiac diagnoses
778	Chest pain	Acute cardiac diagnoses
779	Chest pain	Acute cardiac diagnoses
780	Chest pain	Acute cardiac diagnoses
781	Chest pain	Acute cardiac diagnoses
782	Chest pain	Acute cardiac diagnoses
783	Chest pain	Acute cardiac diagnoses
784	Chest pain	Acute cardiac diagnoses
785	Chest pain	Acute cardiac diagnoses
786	Chest pain	Acute cardiac diagnoses
787	Chest pain	Acute cardiac diagnoses
788	Chest pain	Acute cardiac diagnoses
789	Chest pain	Acute cardiac diagnoses
790	Chest pain	Acute cardiac diagnoses
791	Chest pain	Acute cardiac diagnoses
792	Chest pain	Acute cardiac diagnoses
793	Chest pain	Acute cardiac diagnoses
794	Chest pain	Acute cardiac diagnoses
795	Chest pain	Acute cardiac diagnoses
796	Chest pain	Acute cardiac diagnoses
797	Chest pain	Acute cardiac diagnoses
798	Chest pain	Acute cardiac diagnoses
799	Chest pain	Acute cardiac diagnoses
800	Chest pain	Acute cardiac diagnoses
801	Chest pain	Acute cardiac diagnoses
802	Chest pain	Acute cardiac diagnoses
803	Chest pain	Acute cardiac diagnoses
804	Chest pain	Acute cardiac diagnoses
805	Chest pain	Acute cardiac diagnoses
806	Chest pain	Acute cardiac diagnoses
807	Chest pain	Acute cardiac diagnoses
808	Chest pain	Acute cardiac diagnoses
809	Chest pain	Acute cardiac diagnoses
810	Chest pain	Acute cardiac diagnoses
811	Chest pain	Acute cardiac diagnoses
812	Chest pain	Acute cardiac diagnoses
813	Chest pain	Acute cardiac diagnoses
814	Chest pain	Acute cardiac diagnoses
815	Chest pain	Acute cardiac diagnoses
816	Chest pain	Acute cardiac diagnoses
817	Chest pain	Acute cardiac diagnoses
818	Chest pain	Acute cardiac diagnoses
819	Chest pain	Acute cardiac diagnoses
820	Chest pain	Acute cardiac diagnoses
821	Chest pain	Acute cardiac diagnoses
822	Chest pain	Acute cardiac diagnoses
823	Chest pain	Acute cardiac diagnoses
824	Chest pain	Acute cardiac diagnoses
825	Chest pain	Acute cardiac diagnoses
826	Chest pain	Acute cardiac diagnoses
827	Chest pain	Acute cardiac diagnoses
828	Chest pain	Acute cardiac diagnoses
829	Chest pain	Acute cardiac diagnoses
830	Chest pain	Acute cardiac diagnoses
831	Chest pain	Acute cardiac diagnoses
832	Chest pain	Acute cardiac diagnoses
833	Chest pain	Acute cardiac diagnoses
834	Chest pain	Acute cardiac diagnoses
835	Chest pain	Acute cardiac diagnoses
836	Chest pain	Acute cardiac diagnoses
837	Chest pain	Acute cardiac diagnoses
838	Chest pain	Acute cardiac diagnoses
839	Chest pain	Acute cardiac diagnoses
840	Chest pain	Acute cardiac diagnoses
841	Chest pain	Acute cardiac diagnoses
842	Chest pain	Acute cardiac diagnoses
843	Chest pain	Acute cardiac diagnoses
844	Chest pain	Acute cardiac diagnoses
845	Chest pain	Acute cardiac diagnoses
846	Chest pain	Acute cardiac diagnoses
847	Chest pain	Acute cardiac diagnoses
848	Chest pain	Acute cardiac diagnoses
849	Chest pain	Acute cardiac diagnoses
850	Chest pain	Acute cardiac diagnoses
851	Chest pain	Acute cardiac diagnoses
852	Chest pain	Acute cardiac diagnoses
853	Chest pain	Acute cardiac diagnoses
854	Chest pain	Acute cardiac diagnoses
855	Chest pain	Acute cardiac diagnoses
856	Chest pain	Acute cardiac diagnoses
857	Chest pain	Acute cardiac diagnoses
858	Chest pain	Acute cardiac diagnoses
859	Chest pain	Acute cardiac diagnoses
860	Chest pain	Acute cardiac diagnoses
861	Chest pain	Acute cardiac diagnoses
862	Chest pain	Acute cardiac diagnoses
863	Chest pain	Acute cardiac diagnoses
864	Chest pain	Acute cardiac diagnoses
865	Chest pain	Acute cardiac diagnoses
866	Chest pain	Acute cardiac diagnoses
867	Chest pain	Acute cardiac diagnoses
868	Chest pain	Acute cardiac diagnoses
869	Chest pain	Acute cardiac diagnoses
870	Chest pain	Acute cardiac diagnoses
871	Chest pain	Acute cardiac diagnoses
872	Chest pain	Acute cardiac diagnoses
873	Chest pain	Acute cardiac diagnoses
874	Chest pain	Acute cardiac diagnoses
875	Chest pain	Acute cardiac diagnoses
876	Chest pain	Acute cardiac diagnoses
877	Chest pain	Acute cardiac diagnoses
878	Chest pain	Acute cardiac diagnoses
879	Chest pain	Acute cardiac diagnoses
880	Chest pain	Acute cardiac diagnoses
881	Chest pain	Acute cardiac diagnoses
882	Chest pain	Acute cardiac diagnoses
883	Chest pain	Acute cardiac diagnoses
884	Chest pain	Acute cardiac diagnoses
885	Chest pain	Acute cardiac diagnoses
886	Chest pain	Acute cardiac diagnoses
887	Chest pain	Acute cardiac diagnoses
888	Chest pain	Acute cardiac diagnoses
889	Chest pain	Acute cardiac diagnoses
890	Chest pain	Acute cardiac diagnoses
891	Chest pain	Acute cardiac diagnoses
892	Chest pain	Acute cardiac diagnoses
893	Chest pain	Acute cardiac diagnoses
894	Chest pain	Acute cardiac diagnoses
895	Chest pain	Acute cardiac diagnoses
896	Chest pain	Acute cardiac diagnoses
897	Chest pain	Acute cardiac diagnoses
898	Chest pain	Acute cardiac diagnoses
899	Chest pain	Acute cardiac diagnoses
900	Chest pain	Acute cardiac diagnoses
901	Chest pain	Acute cardiac diagnoses
902	Chest pain	Acute cardiac diagnoses
903	Chest pain	Acute cardiac diagnoses
904	Chest pain	Acute cardiac diagnoses
905	Chest pain	Acute cardiac diagnoses
906	Chest pain	Acute cardiac diagnoses
907	Chest pain	Acute cardiac diagnoses
908	Chest pain	Acute cardiac diagnoses
909	Chest pain	Acute cardiac diagnoses
910	Chest pain	Acute cardiac diagnoses
911	Chest pain	Acute cardiac diagnoses
912	Chest pain	Acute cardiac diagnoses
913	Chest pain	Acute cardiac diagnoses
914	Chest pain	Acute cardiac diagnoses
915	Chest pain	Acute cardiac diagnoses
916	Chest pain	Acute cardiac diagnoses
917	Chest pain	Acute cardiac diagnoses
918	Chest pain	Acute cardiac diagnoses
919	Chest pain	Acute cardiac diagnoses
920	Chest pain	Acute cardiac diagnoses
921	Chest pain	Acute cardiac diagnoses
922	Chest pain	Acute cardiac diagnoses
923	Chest pain	Acute cardiac diagnoses
924	Chest pain	Acute cardiac diagnoses
925	Chest pain	Acute cardiac diagnoses
926	Chest pain	Acute cardiac diagnoses
927	Chest pain	Acute cardiac diagnoses
928	Chest pain	Acute cardiac diagnoses
929	Chest pain	Acute cardiac diagnoses
930	Chest pain	Acute cardiac diagnoses
931	Chest pain	Acute cardiac diagnoses
932	Chest pain	Acute cardiac diagnoses
933	Chest pain	Acute cardiac diagnoses
934	Chest pain	Acute cardiac diagnoses
935	Chest pain	Acute cardiac diagnoses
936	Chest pain	Acute cardiac diagnoses
937	Chest pain	Acute cardiac diagnoses
938	Chest pain	Acute cardiac diagnoses
939	Chest pain	Acute cardiac diagnoses
940	Chest pain	Acute cardiac diagnoses
941	Chest pain	Acute cardiac diagnoses
942	Chest pain	Acute cardiac diagnoses
943	Chest pain	Acute cardiac diagnoses
944	Chest pain	Acute cardiac diagnoses
945	Chest pain	Acute cardiac diagnoses
946	Chest pain	Acute cardiac diagnoses
947	Chest pain	Acute cardiac diagnoses
948	Chest pain	Acute cardiac diagnoses
949	Chest pain	Acute cardiac diagnoses
950	Chest pain	Acute cardiac diagnoses
951	Chest pain	Acute cardiac diagnoses
952	Chest pain	Acute cardiac diagnoses
953	Chest pain	Acute cardiac diagnoses
954	Chest pain	Acute cardiac diagnoses
955	Chest pain	Acute cardiac diagnoses
956	Chest pain	Acute cardiac diagnoses
957	Chest pain	Acute cardiac diagnoses
958	Chest pain	Acute cardiac diagnoses
959	Chest pain	Acute cardiac diagnoses
960	Chest pain	Acute cardiac diagnoses
961	Chest pain	Acute cardiac diagnoses
962	Chest pain	Acute cardiac diagnoses
963	Chest pain	Acute cardiac diagnoses
964	Chest pain	Acute cardiac diagnoses
965	Chest pain	Acute cardiac diagnoses
966	Chest pain	Acute cardiac diagnoses
967	Chest pain	Acute cardiac diagnoses
968	Chest pain	Acute cardiac diagnoses
969	Chest pain	Acute cardiac diagnoses
970	Chest pain	Acute cardiac diagnoses
971	Chest pain	Acute cardiac diagnoses
972	Chest pain	Acute cardiac diagnoses
973	Chest pain	Acute cardiac diagnoses
974	Chest pain	Acute cardiac diagnoses
975	Chest pain	Acute cardiac diagnoses
976	Chest pain	Acute cardiac diagnoses
977	Chest pain	Acute cardiac diagnoses
978	Chest pain	Acute cardiac diagnoses
979	Chest pain	Acute cardiac diagnoses
980	Chest pain	Acute cardiac diagnoses
981	Chest pain	Acute cardiac diagnoses
982	Chest pain	Acute cardiac diagnoses
983	Chest pain	Acute cardiac diagnoses
984	Chest pain	Acute cardiac diagnoses
985	Chest pain	Acute cardiac diagnoses
986	Chest pain	Acute cardiac diagnoses
987	Chest pain	Acute cardiac diagnoses
988	Chest pain	Acute cardiac diagnoses
989	Chest pain	Acute cardiac diagnoses
990	Chest pain	Acute cardiac diagnoses
991	Chest pain	Acute cardiac diagnoses
992	Chest pain	Acute cardiac diagnoses
993	Chest pain	Acute cardiac diagnoses
994	Chest pain	Acute cardiac diagnoses
995	Chest pain	Acute cardiac diagnoses
996	Chest pain	Acute cardiac diagnoses
997	Chest pain	Acute cardiac diagnoses
998	Chest pain	Acute cardiac diagnoses
999	Chest pain	Acute cardiac diagnoses
1000	Chest pain	Acute cardiac diagnoses
1001	Chest pain	Acute cardiac diagnoses
1002	Chest pain	Acute cardiac diagnoses
1003	Chest pain	Acute cardiac diagnoses
1004	Chest pain	Acute cardiac diagnoses
1005	Chest pain	Acute cardiac diagnoses
1006	Chest pain	Acute cardiac diagnoses
1007	Chest pain	Acute cardiac diagnoses
1008	Chest pain	Acute cardiac diagnoses
1009	Chest pain	Acute cardiac diagnoses
1010	Chest pain	Acute cardiac diagnoses
1011	Chest pain	Acute cardiac diagnoses
1012	Chest pain	Acute cardiac diagnoses
1013	Chest pain	Acute cardiac diagnoses
1014	Chest pain	Acute cardiac diagnoses
1015	Chest pain	Acute cardiac diagnoses
1016	Chest pain	Acute cardiac diagnoses
1017	Chest pain	Acute cardiac diagnoses
1018	Chest pain	Acute cardiac diagnoses
1019	Chest pain	Acute cardiac diagnoses
1020	Chest pain	Acute cardiac diagnoses
1021	Chest pain	Acute cardiac diagnoses
1022	Chest pain	Acute cardiac diagnoses
1023	Chest pain	Acute cardiac diagnoses
1024	Chest pain	Acute cardiac diagnoses
1025	Chest pain	Acute cardiac diagnoses
1026	Chest pain	Acute cardiac diagnoses
1027	Chest pain	Acute cardiac diagnoses
1028	Chest pain	Acute cardiac diagnoses
1029	Chest pain	Acute cardiac diagnoses
1030	Chest pain	Acute cardiac diagnoses
1031	Chest pain	Acute cardiac diagnoses
1032	Chest pain	Acute cardiac diagnoses
1033	Chest pain	Acute cardiac diagnoses
1034	Chest pain	Acute cardiac diagnoses
1035	Chest pain	Acute cardiac diagnoses
1036	Chest pain	Acute cardiac diagnoses
1037	Chest pain	Acute cardiac diagnoses
1038	Chest pain	Acute cardiac diagnoses
1039	Chest pain	Acute cardiac diagnoses
1040	Chest pain	Acute cardiac diagnoses
1041	Chest pain	Acute cardiac diagnoses
1042	Chest pain	Acute cardiac diagnoses
1043	Chest pain	Acute cardiac diagnoses
1044	Chest pain	Acute cardiac diagnoses
1045	Chest pain	Acute cardiac diagnoses
1046	Chest pain	Acute cardiac diagnoses
1047	Chest pain	Acute cardiac diagnoses
1048	Chest pain	Acute cardiac diagnoses
1049	Chest pain	Acute cardiac diagnoses
1050	Chest pain	Acute cardiac diagnoses
1051	Chest pain	Acute cardiac diagnoses
1052	Chest pain	Acute cardiac diagnoses
1053	Chest pain	Acute cardiac diagnoses
1054	Chest pain	Acute cardiac diagnoses
1055	Chest pain	Acute cardiac diagnoses
1056	Chest pain	Acute cardiac diagnoses
1057	Chest pain	Acute cardiac diagnoses
1058	Chest pain	Acute cardiac diagnoses
1059	Chest pain	Acute cardiac diagnoses
1060	Chest pain	Acute cardiac diagnoses
1061	Chest pain	Acute cardiac diagnoses
1062	Chest pain	Acute cardiac diagnoses
1063	Chest pain	Acute cardiac diagnoses
1064	Chest pain	Acute cardiac diagnoses
1065	Chest pain	Acute cardiac diagnoses
1066	Chest pain	Acute cardiac diagnoses
1067	Chest pain	Acute cardiac diagnoses
1068	Chest pain	Acute cardiac diagnoses
1069	Chest pain	Acute cardiac diagnoses
1070	Chest pain	Acute cardiac diagnoses
1071	Chest pain	Acute cardiac diagnoses
1072	Chest pain	Acute cardiac diagnoses
1073	Chest pain	Acute cardiac diagnoses
1074	Chest pain	Acute cardiac diagnoses
1075	Chest pain	Acute cardiac diagnoses
1076	Chest pain	Acute cardiac diagnoses
1077	Chest pain	Acute cardiac diagnoses
1078	Chest pain	Acute cardiac diagnoses
1079	Chest pain	Acute cardiac diagnoses
1080	Chest pain	Acute cardiac diagnoses
1081	Chest pain	Acute cardiac diagnoses
1082	Chest pain	Acute cardiac diagnoses
1083	Chest pain	Acute cardiac diagnoses
1084	Chest pain	Acute cardiac diagnoses
1085	Chest pain	Acute cardiac diagnoses
1086	Chest pain	Acute cardiac diagnoses
1087	Chest pain	Acute cardiac diagnoses
1088	Chest pain	Acute cardiac diagnoses
1089	Chest pain	Acute cardiac diagnoses
1090	Chest pain	Acute cardiac diagnoses
1091	Chest pain	Acute cardiac diagnoses
1092	Chest pain	Acute cardiac diagnoses
1093	Chest pain	Acute cardiac diagnoses
1094	Chest pain	Acute cardiac diagnoses
1095	Chest pain	Acute cardiac diagnoses
1096	Chest pain	Acute cardiac diagnoses
1097	Chest pain	Acute cardiac diagnoses
1098	Chest pain	Acute cardiac diagnoses
1099	Chest pain	Acute cardiac diagnoses
1100	Chest pain	Acute cardiac diagnoses
1101	Chest pain	Acute cardiac diagnoses
1102	Chest pain	Acute cardiac diagnoses
1103	Chest pain	Acute cardiac diagnoses
1104	Chest pain	Acute cardiac diagnoses
1105	Chest pain	Acute cardiac diagnoses
1106	Chest pain	Acute cardiac diagnoses
1107	Chest pain	Acute cardiac diagnoses
1108	Chest pain	Acute cardiac diagnoses
1109	Chest pain	Acute cardiac diagnoses
1110	Chest pain	Acute cardiac diagnoses
1111	Chest pain	Acute cardiac diagnoses
1112	Chest pain	Acute cardiac diagnoses
1113	Chest pain	Acute cardiac diagnoses
1114	Chest pain	Acute cardiac diagnoses
1115	Chest pain	Acute cardiac diagnoses
1116	Chest pain	Acute cardiac diagnoses
1117	Chest pain	Acute cardiac diagnoses
1118	Chest pain	Acute cardiac diagnoses
1119	Chest pain	Acute cardiac diagnoses
1120	Chest pain	Acute cardiac diagnoses
1121	Chest pain	Acute cardiac diagnoses
1122	Chest pain	Acute cardiac diagnoses
1123	Chest pain	Acute cardiac diagnoses
1124	Chest pain	Acute cardiac diagnoses
1125	Chest pain	Acute cardiac diagnoses
1126	Chest pain	Acute cardiac diagnoses
1127	Chest pain	Acute cardiac diagnoses
1128	Chest pain	Acute cardiac diagnoses
1129	Chest pain	Acute cardiac diagnoses
1130	Chest pain	Acute cardiac diagnoses
1131	Chest pain	Acute cardiac diagnoses
1132	Chest pain	Acute cardiac diagnoses
1133	Chest pain	Acute cardiac diagnoses
1134	Chest pain	Acute cardiac diagnoses
1135	Chest pain	Acute cardiac diagnoses
1136	Chest pain	Acute cardiac diagnoses
1137	Chest pain	Acute cardiac diagnoses
1138	Chest pain	Acute cardiac diagnoses
1139	Chest pain	Acute cardiac diagnoses
1140	Chest pain	Acute cardiac diagnoses
1141	Chest pain	Acute cardiac diagnoses
1142	Chest pain	Acute cardiac diagnoses
1143	Chest pain	Acute cardiac diagnoses
1144	Chest pain	Acute cardiac diagnoses
1145	Chest pain	Acute cardiac diagnoses
1146	Chest pain	Acute cardiac diagnoses
1147	Chest pain	Acute cardiac diagnoses
1148	Chest pain	Acute cardiac diagnoses
1149	Chest pain	Acute cardiac diagnoses
1150	Chest pain	Acute cardiac diagnoses
1151	Chest pain	Acute cardiac diagnoses
1152	Chest pain	Acute cardiac diagnoses
1153	Chest pain	Acute cardiac diagnoses
1154	Chest pain	Acute cardiac diagnoses
1155	Chest pain	Acute cardiac diagnoses
1156	Chest pain	Acute cardiac diagnoses
1157	Chest pain	Acute cardiac diagnoses
1158	Chest pain	Acute cardiac diagnoses
1159	Chest pain	Acute cardiac diagnoses
1160	Chest pain	Acute cardiac diagnoses
1161	Chest pain	Acute cardiac diagnoses
1162	Chest pain	Acute cardiac diagnoses
1163	Chest pain	Acute cardiac diagnoses
1164	Chest pain	Acute cardiac diagnoses
1165	Chest pain	Acute cardiac diagnoses
1166	Chest pain	Acute cardiac diagnoses
1167	Chest pain	Acute cardiac diagnoses
1168	Chest pain	Acute cardiac diagnoses
1169	Chest pain	Acute cardiac diagnoses
1170	Chest pain	Acute cardiac diagnoses
1171	Chest pain	Acute cardiac diagnoses
1172	Chest pain	Acute cardiac diagnoses
1173	Chest pain	Acute cardiac diagnoses
1174	Chest pain	Acute cardiac diagnoses
1175	Chest pain	Acute cardiac diagnoses
1176	Chest pain	Acute cardiac diagnoses
1177	Chest pain	Acute cardiac diagnoses
1178	Chest pain	Acute cardiac diagnoses
1179	Chest pain	Acute cardiac diagnoses
1180	Chest pain	Acute cardiac diagnoses
1181	Chest pain	Acute cardiac diagnoses
1182	Chest pain	Acute cardiac diagnoses
1183	Chest pain	Acute cardiac diagnoses
1184	Chest pain	Acute cardiac diagnoses
1185	Chest pain	Acute cardiac diagnoses
1186	Chest pain	Acute cardiac diagnoses
1187	Chest pain	Acute cardiac diagnoses
1188	Chest pain	Acute cardiac diagnoses
1189	Chest pain	Acute cardiac diagnoses
1190	Chest pain	Acute cardiac diagnoses
1191	Chest pain	Acute cardiac diagnoses
1192	Chest pain	Acute cardiac diagnoses
1193	Chest pain	Acute cardiac diagnoses
1194	Chest pain	Acute cardiac diagnoses
1195	Chest pain	Acute cardiac diagnoses
1196	Chest pain	Acute cardiac diagnoses
1197	Chest pain	Acute cardiac diagnoses
1198	Chest pain	Acute cardiac diagnoses
1199	Chest pain	Acute cardiac diagnoses
1200	Chest pain	Acute cardiac diagnoses
1201	Chest pain	Acute cardiac diagnoses
1202	Chest pain	Acute cardiac diagnoses
1203	Chest pain	Acute cardiac diagnoses
1204	Chest pain	Acute cardiac diagnoses
1205	Chest pain	Acute cardiac diagnoses
1206	Chest pain	Acute cardiac diagnoses
1207	Chest pain	Acute cardiac diagnoses
1208	Chest pain	Acute cardiac diagnoses
1209	Chest pain	Acute cardiac diagnoses
1210	Chest pain	Acute cardiac diagnoses
1211	Chest pain	Acute cardiac diagnoses
1212	Chest pain	Acute cardiac diagnoses
1213	Chest pain	Acute cardiac diagnoses
1214	Chest pain	Acute cardiac diagnoses
1215	Chest pain	Acute cardiac diagnoses
1216	Chest pain	Acute cardiac diagnoses
1217	Chest pain	Acute cardiac diagnoses
1218	Chest pain	Acute cardiac diagnoses
1219	Chest pain	Acute cardiac diagnoses
1220	Chest pain	Acute cardiac diagnoses
1221	Chest pain	Acute cardiac diagnoses
1222	Chest pain	Acute cardiac diagnoses
1223	Chest pain	Acute cardiac diagnoses
1224	Chest pain	Acute cardiac diagnoses
1225	Chest pain	Acute cardiac diagnoses
1226	Chest pain	Acute cardiac diagnoses
1227	Chest pain	Acute cardiac diagnoses
1228	Chest pain	Acute cardiac diagnoses
1229	Chest pain	Acute cardiac diagnoses
1230	Chest pain	Acute cardiac diagnoses
1231	Chest pain	Acute cardiac diagnoses
1232	Chest pain	Acute cardiac diagnoses
1233	Chest pain	Acute cardiac diagnoses
1234	Chest pain	Acute cardiac diagnoses
1235	Chest pain	Acute cardiac diagnoses
1236	Chest pain	Acute cardiac diagnoses
1237	Chest pain	Acute cardiac diagnoses
1238	Chest pain	Acute cardiac diagnoses
1239	Chest pain	Acute cardiac diagnoses
1240	Chest pain	Acute cardiac diagnoses
1241	Chest pain	Acute cardiac diagnoses
1242	Chest pain	Acute cardiac diagnoses
1243	Chest pain	Acute cardiac diagnoses
1244	Chest pain	Acute cardiac diagnoses
1245	Chest pain	Acute cardiac diagnoses
1246	Chest pain	Acute cardiac diagnoses
1247	Chest pain	Acute cardiac diagnoses
1248	Chest pain	Acute cardiac diagnoses
1249	Chest pain	Acute cardiac diagnoses
1250	Chest pain	Acute cardiac diagnoses
1251	Chest pain	Acute cardiac diagnoses
1252	Chest pain	Acute cardiac diagnoses
1253	Chest pain	Acute cardiac diagnoses
1254	Chest pain	Acute cardiac diagnoses
1255	Chest pain	Acute cardiac diagnoses
1256	Chest pain	Acute cardiac diagnoses
1257	Chest pain	Acute cardiac diagnoses
1258	Chest pain	Acute cardiac diagnoses
1259	Chest pain	Acute cardiac diagnoses
1260	Chest pain	Acute cardiac diagnoses
1261	Chest pain	Acute cardiac diagnoses
1262	Chest pain	Acute cardiac diagnoses
1263	Chest pain	Acute cardiac diagnoses
1264	Chest pain	Acute cardiac diagnoses
1265	Chest pain	Acute cardiac diagnoses
1266	Chest pain	Acute cardiac diagnoses
1267	Chest pain	Acute cardiac diagnoses
1268	Chest pain	Acute cardiac diagnoses
1269	Chest pain	Acute cardiac diagnoses
1270	Chest pain	Acute cardiac diagnoses
1271	Chest pain	Acute cardiac diagnoses
1272	Chest pain	Acute cardiac diagnoses
1273	Chest pain	Acute cardiac diagnoses
1274	Chest pain	Acute cardiac diagnoses
1275	Chest pain	Acute cardiac diagnoses
1276	Chest pain	Acute cardiac diagnoses
1277	Chest pain	Acute cardiac diagnoses
1278	Chest pain	Acute cardiac diagnoses
1279	Chest pain	Acute cardiac diagnoses
1280	Chest pain	Acute cardiac diagnoses
1281	Chest pain	Acute cardiac diagnoses
1282	Chest pain	Acute cardiac diagnoses
1283	Chest pain	Acute cardiac diagnoses
1284	Chest pain	Acute cardiac diagnoses
1285	Chest pain	Acute cardiac diagnoses
1286	Chest pain	Acute cardiac diagnoses
1287	Chest pain	Acute cardiac diagnoses
1288	Chest pain	Acute cardiac diagnoses
1289	Chest pain	Acute cardiac diagnoses
1290	Chest pain	Acute cardiac diagnoses
1291	Chest pain	Acute cardiac diagnoses
1292	Chest pain	Acute cardiac diagnoses
1293	Chest pain	Acute cardiac diagnoses
1294	Chest pain	Acute cardiac diagnoses
1295	Chest pain	Acute cardiac diagnoses
1296	Chest pain	Acute cardiac diagnoses
1297	Chest pain	Acute cardiac diagnoses
1298	Chest pain	Acute cardiac diagnoses
1299	Chest pain	Acute cardiac diagnoses
1300	Chest pain	Acute cardiac diagnoses
1301	Chest pain	Acute cardiac diagnoses
1302	Chest pain	Acute cardiac diagnoses
1303	Chest pain	Acute cardiac diagnoses
1304	Chest pain	Acute cardiac diagnoses
1305	Chest pain	Acute cardiac diagnoses
1306	Chest pain	Acute cardiac diagnoses
1307	Chest pain	Acute cardiac diagnoses
1308	Chest pain	Acute cardiac diagnoses
1309	Chest pain	Acute cardiac diagnoses
1310	Chest pain	Acute cardiac diagnoses
1311	Chest pain	Acute cardiac diagnoses
1312	Chest pain	Acute cardiac diagnoses
1313	Chest pain	Acute cardiac diagnoses
1314	Chest pain	Acute cardiac diagnoses
1315	Chest pain	Acute cardiac diagnoses
1316	Chest pain	Acute cardiac diagnoses
1317	Chest pain	Acute cardiac diagnoses
1318	Chest pain	Acute cardiac diagnoses
1319	Chest pain	Other diagnoses
1320	Chest pain	Other diagnoses
1321	Chest pain	Other diagnoses
1322	Chest pain	Other diagnoses
1323	Chest pain	Other diagnoses
1324	Chest pain	Other diagnoses
1325	Chest pain	Other diagnoses
1326	Chest pain	Other diagnoses
1327	Chest pain	Other diagnoses
1328	Chest pain	Other diagnoses
1329	Chest pain	Other diagnoses
1330	Chest pain	Other diagnoses
1331	Chest pain	Other diagnoses
1332	Chest pain	Other diagnoses
1333	Chest pain	Other diagnoses
1334	Chest pain	Other diagnoses
1335	Chest pain	Other diagnoses
1336	Chest pain	Other diagnoses
1337	Chest pain	Other diagnoses
1338	Chest pain	Other diagnoses
1339	Chest pain	Other diagnoses
1340	Chest pain	Other diagnoses
1341	Chest pain	Other diagnoses
1342	Chest pain	Other diagnoses
1343	Chest pain	Other diagnoses
1344	Chest pain	Other diagnoses
1345	Chest pain	Other diagnoses
1346	Chest pain	Other diagnoses
1347	Chest pain	Other diagnoses
1348	Chest pain	Other diagnoses
1349	Chest pain	Other diagnoses
1350	Chest pain	Other diagnoses
1351	Chest pain	Other diagnoses
1352	Chest pain	Other diagnoses
1353	Chest pain	Other diagnoses
1354	Chest pain	Other diagnoses
1355	Chest pain	Other diagnoses
1356	Chest pain	Other diagnoses
1357	Chest pain	Other diagnoses
1358	Chest pain	Other diagnoses
1359	Chest pain	Other diagnoses
1360	Chest pain	Other diagnoses
1361	Chest pain	Other diagnoses
1362	Chest pain	Other diagnoses
1363	Chest pain	Other diagnoses
1364	Chest pain	Other diagnoses
1365	Chest pain	Other diagnoses
1366	Chest pain	Other diagnoses
1367	Chest pain	Other diagnoses
1368	Chest pain	Other diagnoses
1369	Chest pain	Other diagnoses
1370	Chest pain	Other diagnoses
1371	Chest pain	Other diagnoses
1372	Chest pain	Other diagnoses
1373	Chest pain	Other diagnoses
1374	Chest pain	Other diagnoses
1375	Chest pain	Other diagnoses
1376	Chest pain	Other diagnoses
1377	Chest pain	Other diagnoses
1378	Chest pain	Other diagnoses
1379	Chest pain	Other diagnoses
1380	Chest pain	Other diagnoses
1381	Chest pain	Other diagnoses
1382	Chest pain	Other diagnoses
1383	Chest pain	Other diagnoses
1384	Chest pain	Other diagnoses
1385	Chest pain	Other diagnoses
1386	Chest pain	Other diagnoses
1387	Chest pain	Other diagnoses
1388	Chest pain	Other diagnoses
1389	Chest pain	Other diagnoses
1390	Chest pain	Other diagnoses
1391	Chest pain	Other diagnoses
1392	Chest pain	Other diagnoses
1393	Chest pain	Other diagnoses
1394	Chest pain	Other diagnoses
1395	Chest pain	Other diagnoses
1396	Chest pain	Other diagnoses
1397	Chest pain	Other diagnoses
1398	Chest pain	Other diagnoses
1399	Chest pain	Other diagnoses
1400	Chest pain	Other diagnoses
1401	Chest pain	Other diagnoses
1402	Chest pain	Other diagnoses
1403	Chest pain	Other diagnoses
1404	Chest pain	Other diagnoses
1405	Chest pain	Other diagnoses
1406	Chest pain	Other diagnoses
1407	Chest pain	Other diagnoses
1408	Chest pain	Other diagnoses
1409	Chest pain	Other diagnoses
1410	Chest pain	Other diagnoses
1411	Chest pain	Other diagnoses
1412	Chest pain	Other diagnoses
1413	Chest pain	Other diagnoses
1414	Chest pain	Other diagnoses
1415	Chest pain	Other diagnoses
1416	Chest pain	Other diagnoses
1417	Chest pain	Other diagnoses
1418	Chest pain	Other diagnoses
1419	Chest pain	Other diagnoses
1420	Chest pain	Other diagnoses
1421	Chest pain	Other diagnoses
1422	Chest pain	Other diagnoses
1423	Chest pain	Other diagnoses
1424	Chest pain	Other diagnoses
1425	Chest pain	Other diagnoses
1426	Chest pain	Other diagnoses
1427	Chest pain	Other diagnoses
1428	Chest pain	Other diagnoses
1429	Chest pain	Other diagnoses
1430	Chest pain	Other diagnoses
1431	Chest pain	Other diagnoses
1432	Chest pain	Other diagnoses
1433	Chest pain	Other diagnoses
1434	Chest pain	Other diagnoses
1435	Chest pain	Other diagnoses
1436	Chest pain	Other diagnoses
1437	Chest pain	Other diagnoses
1438	Chest pain	Other diagnoses
1439	Chest pain	Other diagnoses
1440	Chest pain	Other diagnoses
1441	Chest pain	Other diagnoses
1442	Chest pain	Other diagnoses
1443	Chest pain	Other diagnoses
1444	Chest pain	Other diagnoses
1445	Chest pain	Other diagnoses
1446	Chest pain	Other diagnoses
1447	Chest pain	Other diagnoses
1448	Chest pain	Other diagnoses
1449	Chest pain	Other diagnoses
1450	Chest pain	Other diagnoses
1451	Chest pain	Other diagnoses
1452	Chest pain	Other diagnoses
1453	Chest pain	Other diagnoses
1454	Chest pain	Other diagnoses
1455	Chest pain	Other diagnoses
1456	Chest pain	Other diagnoses
1457	Chest pain	Other diagnoses
1458	Chest pain	Other diagnoses
1459	Chest pain	Other diagnoses
1460	Chest pain	Other diagnoses
1461	Chest pain	Other diagnoses
1462	Chest pain	Other diagnoses
1463	Chest pain	Other diagnoses
1464	Chest pain	Other diagnoses
1465	Chest pain	Other diagnoses
1466	Chest pain	Other diagnoses
1467	Chest pain	Other diagnoses
1468	Chest pain	Other diagnoses
1469	Chest pain	Other diagnoses
1470	Chest pain	Other diagnoses
1471	Chest pain	Other diagnoses
1472	Chest pain	Other diagnoses
1473	Chest pain	Other diagnoses
1474	Chest pain	Other diagnoses
1475	Chest pain	Other diagnoses
1476	Chest pain	Other diagnoses
1477	Chest pain	Other diagnoses
1478	Chest pain	Other diagnoses
1479	Chest pain	Other diagnoses
1480	Chest pain	Other diagnoses
1481	Chest pain	Other diagnoses
1482	Chest pain	Other diagnoses
1483	Chest pain	Other diagnoses
1484	Chest pain	Other diagnoses
1485	Chest pain	Other diagnoses
1486	Chest pain	Other diagnoses
1487	Chest pain	Other diagnoses
1488	Chest pain	Other diagnoses
1489	Chest pain	Other diagnoses
1490	Chest pain	Other diagnoses
1491	Chest pain	Other diagnoses
1492	Chest pain	Other diagnoses
1493	Chest pain	Other diagnoses
1494	Chest pain	Other diagnoses
1495	Chest pain	Other diagnoses
1496	Chest pain	Other diagnoses
1497	Chest pain	Other diagnoses
1498	Chest pain	Other diagnoses
1499	Chest pain	Other diagnoses
1500	Chest pain	Other diagnoses
1501	Chest pain	Other diagnoses
1502	Chest pain	Other diagnoses
1503	Chest pain	Other diagnoses
1504	Chest pain	Other diagnoses
1505	Chest pain	Other diagnoses
1506	Chest pain	Other diagnoses
1507	Chest pain	Other diagnoses
1508	Chest pain	Other diagnoses
1509	Chest pain	Other diagnoses
1510	Chest pain	Other diagnoses
1511	Chest pain	Other diagnoses
1512	Chest pain	Other diagnoses
1513	Chest pain	Other diagnoses
1514	Chest pain	Other diagnoses
1515	Chest pain	Other diagnoses
1516	Chest pain	Other diagnoses
1517	Chest pain	Other diagnoses
1518	Chest pain	Other diagnoses
1519	Chest pain	Other diagnoses
1520	Chest pain	Other diagnoses
1521	Chest pain	Other diagnoses
1522	Chest pain	Other diagnoses
1523	Chest pain	Other diagnoses
1524	Chest pain	Other diagnoses
1525	Chest pain	Other diagnoses
1526	Chest pain	Other diagnoses
1527	Chest pain	Other diagnoses
1528	Chest pain	Other diagnoses
1529	Chest pain	Other diagnoses
1530	Chest pain	Other diagnoses
1531	Chest pain	Other diagnoses
1532	Chest pain	Other diagnoses
1533	Chest pain	Other diagnoses
1534	Chest pain	Other diagnoses
1535	Chest pain	Other diagnoses
1536	Chest pain	Other diagnoses
1537	Chest pain	Other diagnoses
1538	Chest pain	Other diagnoses
1539	Chest pain	Other diagnoses
1540	Chest pain	Other diagnoses
1541	Chest pain	Other diagnoses
1542	Chest pain	Other diagnoses
1543	Chest pain	Other diagnoses
1544	Chest pain	Other diagnoses
1545	Chest pain	Other diagnoses
1546	Chest pain	Other diagnoses
1547	Chest pain	Other diagnoses
1548	Chest pain	Other diagnoses
1549	Chest pain	Other diagnoses
1550	Chest pain	Other diagnoses
1551	Chest pain	Other diagnoses
1552	Chest pain	Other diagnoses
1553	Chest pain	Other diagnoses
1554	Chest pain	Other diagnoses
1555	Chest pain	Other diagnoses
1556	Chest pain	Other diagnoses
1557	Chest pain	Other diagnoses
1558	Chest pain	Other diagnoses
1559	Chest pain	Other diagnoses
1560	Chest pain	Other diagnoses
1561	Chest pain	Other diagnoses
1562	Chest pain	Other diagnoses
1563	Chest pain	Other diagnoses
1564	Chest pain	Other diagnoses
1565	Chest pain	Other diagnoses
1566	Chest pain	Other diagnoses
1567	Chest pain	Other diagnoses
1568	Chest pain	Other diagnoses
1569	Chest pain	Other diagnoses
1570	Chest pain	Other diagnoses
1571	Chest pain	Other diagnoses
1572	Chest pain	Other diagnoses
1573	Chest pain	Other diagnoses
1574	Chest pain	Other diagnoses
1575	Chest pain	Other diagnoses
1576	Chest pain	Other diagnoses
1577	Chest pain	Other diagnoses
1578	Chest pain	Other diagnoses
1579	Chest pain	Other diagnoses
1580	Chest pain	Other diagnoses
1581	Chest pain	Other diagnoses
1582	Chest pain	Other diagnoses
1583	Chest pain	Other diagnoses
1584	Chest pain	Other diagnoses
1585	Chest pain	Other diagnoses
1586	Chest pain	Other diagnoses
1587	Chest pain	Other diagnoses
1588	Chest pain	Other diagnoses
1589	Chest pain	Other diagnoses
1590	Chest pain	Other diagnoses
1591	Chest pain	Other diagnoses
1592	Chest pain	Other diagnoses
1593	Chest pain	Other diagnoses
1594	Chest pain	Other diagnoses
1595	Chest pain	Other diagnoses
1596	Chest pain	Other diagnoses
1597	Chest pain	Other diagnoses
1598	Chest pain	Other diagnoses
1599	Chest pain	Other diagnoses
1600	Chest pain	Other diagnoses
1601	Chest pain	Other diagnoses
1602	Chest pain	Other diagnoses
1603	Chest pain	Other diagnoses
1604	Chest pain	Other diagnoses
1605	Chest pain	Other diagnoses
1606	Chest pain	Other diagnoses
1607	Chest pain	Other diagnoses
1608	Chest pain	Other diagnoses
1609	Chest pain	Other diagnoses
1610	Chest pain	Other diagnoses
1611	Chest pain	Other diagnoses
1612	Chest pain	Other diagnoses
1613	Chest pain	Other diagnoses
1614	Chest pain	Other diagnoses
1615	Chest pain	Other diagnoses
1616	Chest pain	Other diagnoses
1617	Chest pain	Other diagnoses
1618	Chest pain	Other diagnoses
1619	Chest pain	Other diagnoses
1620	Chest pain	Other diagnoses
1621	Chest pain	Other diagnoses
1622	Chest pain	Other diagnoses
1623	Chest pain	Other diagnoses
1624	Chest pain	Other diagnoses
1625	Chest pain	Other diagnoses
1626	Chest pain	Other diagnoses
1627	Chest pain	Other diagnoses
1628	Chest pain	Other diagnoses
1629	Chest pain	Other diagnoses
1630	Chest pain	Other diagnoses
1631	Chest pain	Other diagnoses
1632	Chest pain	Other diagnoses
1633	Chest pain	Other diagnoses
1634	Chest pain	Other diagnoses
1635	Chest pain	Other diagnoses
1636	Chest pain	Other diagnoses
1637	Chest pain	Other diagnoses
1638	Chest pain	Other diagnoses
1639	Chest pain	Other diagnoses
1640	Chest pain	Other diagnoses
1641	Chest pain	Other diagnoses
1642	Chest pain	Other diagnoses
1643	Chest pain	Other diagnoses
1644	Chest pain	Other diagnoses
1645	Chest pain	Other diagnoses
1646	Chest pain	Other diagnoses
1647	Chest pain	Other diagnoses
1648	Chest pain	Other diagnoses
1649	Chest pain	Other diagnoses
1650	Chest pain	Other diagnoses
1651	Chest pain	Other diagnoses
1652	Chest pain	Other diagnoses
1653	Chest pain	Other diagnoses
1654	Chest pain	Other diagnoses
1655	Chest pain	Other diagnoses
1656	Chest pain	Other diagnoses
1657	Chest pain	Other diagnoses
1658	Chest pain	Other diagnoses
1659	Chest pain	Other diagnoses
1660	Chest pain	Other diagnoses
1661	Chest pain	Other diagnoses
1662	Chest pain	Other diagnoses
1663	Chest pain	Other diagnoses
1664	Chest pain	Other diagnoses
1665	Chest pain	Other diagnoses
1666	Chest pain	Other diagnoses
1667	Chest pain	Other diagnoses
1668	Chest pain	Other diagnoses
1669	Chest pain	Other diagnoses
1670	Chest pain	Other diagnoses
1671	Chest pain	Other diagnoses
1672	Chest pain	Other diagnoses
1673	Chest pain	Other diagnoses
1674	Chest pain	Other diagnoses
1675	Chest pain	Other diagnoses
1676	Chest pain	Other diagnoses
1677	Chest pain	Other diagnoses
1678	Chest pain	Other diagnoses
1679	Chest pain	Other diagnoses
1680	Chest pain	Other diagnoses
1681	Chest pain	Other diagnoses
1682	Chest pain	Other diagnoses
1683	Chest pain	Other diagnoses
1684	Chest pain	Other diagnoses
1685	Chest pain	Other diagnoses
1686	Chest pain	Other diagnoses
1687	Chest pain	Other diagnoses
1688	Chest pain	Other diagnoses
1689	Chest pain	Other diagnoses
1690	Chest pain	Other diagnoses
1691	Chest pain	Other diagnoses
1692	Chest pain	Other diagnoses
1693	Chest pain	Other diagnoses
1694	Chest pain	Other diagnoses
1695	Chest pain	Other diagnoses
1696	Chest pain	Other diagnoses
1697	Chest pain	Other diagnoses
1698	Chest pain	Other diagnoses
1699	Chest pain	Other diagnoses
1700	Chest pain	Other diagnoses
1701	Chest pain	Other diagnoses
1702	Chest pain	Other diagnoses
1703	Chest pain	Other diagnoses
1704	Chest pain	Other diagnoses
1705	Chest pain	Other diagnoses
1706	Chest pain	Other diagnoses
1707	Chest pain	Other diagnoses
1708	Chest pain	Other diagnoses
1709	Chest pain	Other diagnoses
1710	Chest pain	Other diagnoses
1711	Chest pain	Other diagnoses
1712	Chest pain	Other diagnoses
1713	Chest pain	Other diagnoses
1714	Chest pain	Other diagnoses
1715	Chest pain	Other diagnoses
1716	Chest pain	Other diagnoses
1717	Chest pain	Other diagnoses
1718	Chest pain	Other diagnoses
1719	Chest pain	Other diagnoses
1720	Chest pain	Other diagnoses
1721	Chest pain	Other diagnoses
1722	Chest pain	Other diagnoses
1723	Chest pain	Other diagnoses
1724	Chest pain	Other diagnoses
1725	Chest pain	Other diagnoses
1726	Chest pain	Other diagnoses
1727	Chest pain	Other diagnoses
1728	Chest pain	Other diagnoses
1729	Chest pain	Other diagnoses
1730	Chest pain	Other diagnoses
1731	Chest pain	Other diagnoses
1732	Chest pain	Other diagnoses
1733	Chest pain	Other diagnoses
1734	Chest pain	Other diagnoses
1735	Chest pain	Other diagnoses
1736	Chest pain	Other diagnoses
1737	Chest pain	Other diagnoses
1738	Chest pain	Other diagnoses
1739	Chest pain	Other diagnoses
1740	Chest pain	Other diagnoses
1741	Chest pain	Other diagnoses
1742	Chest pain	Other diagnoses
1743	Chest pain	Other diagnoses
1744	Chest pain	Other diagnoses
1745	Chest pain	Other diagnoses
1746	Chest pain	Other diagnoses
1747	Chest pain	Other diagnoses
1748	Chest pain	Other diagnoses
1749	Chest pain	Other diagnoses
1750	Chest pain	Other diagnoses
1751	Chest pain	Other diagnoses
1752	Chest pain	Other diagnoses
1753	Chest pain	Other diagnoses
1754	Chest pain	Other diagnoses
1755	Chest pain	Other diagnoses
1756	Chest pain	Other diagnoses
1757	Chest pain	Other diagnoses
1758	Chest pain	Other diagnoses
1759	Chest pain	Other diagnoses
1760	Chest pain	Other diagnoses
1761	Chest pain	Other diagnoses
1762	Chest pain	Other diagnoses
1763	Chest pain	Other diagnoses
1764	Chest pain	Other diagnoses
1765	Chest pain	Other diagnoses
1766	Chest pain	Other diagnoses
1767	Chest pain	Other diagnoses
1768	Chest pain	Other diagnoses
1769	Chest pain	Other diagnoses
1770	Chest pain	Other diagnoses
1771	Chest pain	Other diagnoses
1772	Chest pain	Other diagnoses
1773	Chest pain	Other diagnoses
1774	Chest pain	Other diagnoses
1775	Chest pain	Other diagnoses
1776	Chest pain	Other diagnoses
1777	Chest pain	Other diagnoses
1778	Chest pain	Other diagnoses
1779	Chest pain	Other diagnoses
1780	Chest pain	Other diagnoses
1781	Chest pain	Other diagnoses
1782	Chest pain	Other diagnoses
1783	Chest pain	Other diagnoses
1784	Chest pain	Other diagnoses
1785	Chest pain	Other diagnoses
1786	Chest pain	Other diagnoses
1787	Chest pain	Other diagnoses
1788	Chest pain	Other diagnoses
1789	Chest pain	Other diagnoses
1790	Chest pain	Other diagnoses
1791	Chest pain	Other diagnoses
1792	Chest pain	Other diagnoses
1793	Chest pain	Other diagnoses
1794	Chest pain	Other diagnoses
1795	Chest pain	Other diagnoses
1796	Chest pain	Other diagnoses
1797	Chest pain	Other diagnoses
1798	Chest pain	Other diagnoses
1799	Chest pain	Other diagnoses
1800	Chest pain	Other diagnoses
1801	Chest pain	Other diagnoses
1802	Chest pain	Other diagnoses
1803	Chest pain	Other diagnoses
1804	Chest pain	Other diagnoses
1805	Chest pain	Other diagnoses
1806	Chest pain	Other diagnoses
1807	Chest pain	Other diagnoses
1808	Chest pain	Other diagnoses
1809	Chest pain	Other diagnoses
1810	Chest pain	Other diagnoses
1811	Chest pain	Other diagnoses
1812	Chest pain	Other diagnoses
1813	Chest pain	Other diagnoses
1814	Chest pain	Other diagnoses
1815	Chest pain	Other diagnoses
1816	Chest pain	Other diagnoses
1817	Chest pain	Other diagnoses
1818	Chest pain	Other diagnoses
1819	Chest pain	Other diagnoses
1820	Chest pain	Other diagnoses
1821	Chest pain	Other diagnoses
1822	Chest pain	Other diagnoses
1823	Chest pain	Other diagnoses
1824	Chest pain	Other diagnoses
1825	Chest pain	Other diagnoses
1826	Chest pain	Other diagnoses
1827	Chest pain	Other diagnoses
1828	Chest pain	Other diagnoses
1829	Chest pain	Other diagnoses
1830	Chest pain	Other diagnoses
1831	Chest pain	Other diagnoses
1832	Chest pain	Other diagnoses
1833	Chest pain	Other diagnoses
1834	Chest pain	Other diagnoses
1835	Chest pain	Other diagnoses
1836	Chest pain	Other diagnoses
1837	Chest pain	Other diagnoses
1838	Chest pain	Other diagnoses
1839	Chest pain	Other diagnoses
1840	Chest pain	Other diagnoses
1841	Chest pain	Other diagnoses
1842	Chest pain	Other diagnoses
1843	Chest pain	Other diagnoses
1844	Chest pain	Other diagnoses
1845	Chest pain	Other diagnoses
1846	Chest pain	Other diagnoses
1847	Chest pain	Other diagnoses
1848	Chest pain	Other diagnoses
1849	Chest pain	Other diagnoses
1850	Chest pain	Other diagnoses
1851	Chest pain	Other diagnoses
1852	Chest pain	Other diagnoses
1853	Chest pain	Other diagnoses
1854	Chest pain	Other diagnoses
1855	Chest pain	Other diagnoses
1856	Chest pain	Other diagnoses
1857	Chest pain	Other diagnoses
1858	Chest pain	Other diagnoses
1859	Chest pain	Other diagnoses
1860	Chest pain	Other diagnoses
1861	Chest pain	Other diagnoses
1862	Chest pain	Other diagnoses
1863	Chest pain	Other diagnoses
1864	Chest pain	Other diagnoses
1865	Chest pain	Other diagnoses
1866	Chest pain	Other diagnoses
1867	Chest pain	Other diagnoses
1868	Chest pain	Other diagnoses
1869	Chest pain	Other diagnoses
1870	Chest pain	Other diagnoses
1871	Chest pain	Other diagnoses
1872	Chest pain	Other diagnoses
1873	Chest pain	Other diagnoses
1874	Chest pain	Other diagnoses
1875	Chest pain	Other diagnoses
1876	Chest pain	Other diagnoses
1877	Chest pain	Other diagnoses
1878	Chest pain	Other diagnoses
1879	Chest pain	Other diagnoses
1880	Chest pain	Other diagnoses
1881	Chest pain	Other diagnoses
1882	Chest pain	Other diagnoses
1883	Chest pain	Other diagnoses
1884	Chest pain	Other diagnoses
1885	Chest pain	Other diagnoses
1886	Chest pain	Other diagnoses
1887	Chest pain	Other diagnoses
1888	Chest pain	Other diagnoses
1889	Chest pain	Other diagnoses
1890	Chest pain	Other diagnoses
1891	Chest pain	Other diagnoses
1892	Chest pain	Other diagnoses
1893	Chest pain	Other diagnoses
1894	Chest pain	Other diagnoses
1895	Chest pain	Other diagnoses
1896	Chest pain	Other diagnoses
1897	Chest pain	Other diagnoses
1898	Chest pain	Other diagnoses
1899	Chest pain	Other diagnoses
1900	Chest pain	Other diagnoses
1901	Chest pain	Other diagnoses
1902	Chest pain	Other diagnoses
1903	Chest pain	Other diagnoses
1904	Chest pain	Other diagnoses
1905	Chest pain	Other diagnoses
1906	Chest pain	Other diagnoses
1907	Chest pain	Other diagnoses
1908	Chest pain	Other diagnoses
1909	Chest pain	Other diagnoses
1910	Chest pain	Other diagnoses
1911	Chest pain	Other diagnoses
1912	Chest pain	Other diagnoses
1913	Chest pain	Other diagnoses
1914	Chest pain	Other diagnoses
1915	Chest pain	Other diagnoses
1916	Chest pain	Other diagnoses
1917	Chest pain	Other diagnoses
1918	Chest pain	Other diagnoses
1919	Chest pain	Other diagnoses
1920	Chest pain	Other diagnoses
1921	Chest pain	Other diagnoses
1922	Chest pain	Other diagnoses
1923	Chest pain	Other diagnoses
1924	Chest pain	Other diagnoses
1925	Chest pain	Other diagnoses
1926	Chest pain	Other diagnoses
1927	Chest pain	Other diagnoses
1928	Chest pain	Other diagnoses
1929	Chest pain	Other diagnoses
1930	Chest pain	Other diagnoses
1931	Chest pain	Other diagnoses
1932	Chest pain	Other diagnoses
1933	Chest pain	Other diagnoses
1934	Chest pain	Other diagnoses
1935	Chest pain	Other diagnoses
1936	Chest pain	Other diagnoses
1937	Chest pain	Other diagnoses
1938	Chest pain	Other diagnoses
1939	Chest pain	Other diagnoses
1940	Chest pain	Other diagnoses
1941	Chest pain	Other diagnoses
1942	Chest pain	Other diagnoses
1943	Chest pain	Other diagnoses
1944	Chest pain	Other diagnoses
1945	Chest pain	Other diagnoses
1946	Chest pain	Other diagnoses
1947	Chest pain	Other diagnoses
1948	Chest pain	Other diagnoses
1949	Chest pain	Other diagnoses
1950	Chest pain	Other diagnoses
1951	Chest pain	Other diagnoses
1952	Chest pain	Other diagnoses
1953	Chest pain	Other diagnoses
1954	Chest pain	Other diagnoses
1955	Chest pain	Other diagnoses
1956	Chest pain	Other diagnoses
1957	Chest pain	Other diagnoses
1958	Chest pain	Other diagnoses
1959	Chest pain	Other diagnoses
1960	Chest pain	Other diagnoses
1961	Chest pain	Other diagnoses
1962	Chest pain	Other diagnoses
1963	Chest pain	Other diagnoses
1964	Chest pain	Other diagnoses
1965	Chest pain	Other diagnoses
1966	Chest pain	Other diagnoses
1967	Chest pain	Other diagnoses
1968	Chest pain	Other diagnoses
1969	Chest pain	Other diagnoses
1970	Chest pain	Other diagnoses
1971	Chest pain	Other diagnoses
1972	Chest pain	Other diagnoses
1973	Chest pain	Other diagnoses
1974	Chest pain	Other diagnoses
1975	Chest pain	Other diagnoses
1976	Chest pain	Other diagnoses
1977	Chest pain	Other diagnoses
1978	Chest pain	Other diagnoses
1979	Chest pain	Other diagnoses
1980	Chest pain	Other diagnoses
1981	Chest pain	Other diagnoses
1982	Chest pain	Other diagnoses
1983	Chest pain	Other diagnoses
1984	Chest pain	Other diagnoses
1985	Chest pain	Other diagnoses
1986	Chest pain	Other diagnoses
1987	Chest pain	Other diagnoses
1988	Chest pain	Other diagnoses
1989	Chest pain	Other diagnoses
1990	Chest pain	Other diagnoses
1991	Chest pain	Other diagnoses
1992	Chest pain	Other diagnoses
1993	Chest pain	Other diagnoses
1994	Chest pain	Other diagnoses
1995	Chest pain	Other diagnoses
1996	Chest pain	Other diagnoses
1997	Chest pain	Other diagnoses
1998	Chest pain	Other diagnoses
1999	Chest pain	Other diagnoses
[truncated: 59,089 more rows]
